# Supplementary material for: Analysis of Expression Profiles of mRNA and lncRNA in Oviduct During Estrus Phase of Sheep (Ovis Aries) with Two Fecundity (FecB Gene) Genotypes
Source: Research Square preprint supplement (doi:10.21203/rs.3.rs-119198/v1), 2021-01-08
Supplement: Supplementary file 1 [file 347428dbff9b1e202f8cdd2a.xlsx]

## Sheet: MF vs ML lncRNA cis
gene list: cis-target genes of DE lncRNAs identified in MF vs. ML
GO_accession	Description	Term_type	Over_represented_pValue	Corrected_pValue	CAD_item	CAD_list	Bg_item	Bg_list	Gene_names
GO:0000786	nucleosome	cellular_component	5.6666e-05	0.1651	4	128	40	20361	1.01112e+35
GO:0032993	protein-DNA complex	cellular_component	9.9036e-05	0.1651	4	128	45	20361	1.01112e+35
GO:0000785	chromatin	cellular_component	0.00022532	0.1651	4	128	62	20361	1.01112e+35
GO:0006334	nucleosome assembly	biological_process	0.00022907	0.1651	4	128	62	20361	1.01106e+35
GO:0031497	chromatin assembly	biological_process	0.00022907	0.1651	4	128	62	20361	1.01112e+35
GO:0034728	nucleosome organization	biological_process	0.00022907	0.1651	4	128	62	20361	1.01112e+35
GO:0006352	DNA-dependent transcription, initiation	biological_process	0.00027304	0.1651	6	128	167	20361	1.01112e+53
GO:0006333	chromatin assembly or disassembly	biological_process	0.00029535	0.1651	4	128	66	20361	1.01106e+35
GO:0000045	autophagic vacuole assembly	biological_process	0.0012533	0.48611	2	128	10	20361	1.01107e+17
GO:0007033	vacuole organization	biological_process	0.0012533	0.48611	2	128	10	20361	1.01107e+17
GO:0016236	macroautophagy	biological_process	0.0012533	0.48611	2	128	10	20361	1.01107e+17
GO:0006323	DNA packaging	biological_process	0.0017003	0.48611	4	128	96	20361	1.01106e+35
GO:0065004	protein-DNA complex assembly	biological_process	0.0017939	0.48611	4	128	102	20361	1.01112e+35
GO:0071824	protein-DNA complex subunit organization	biological_process	0.0017939	0.48611	4	128	102	20361	1.01112e+35
GO:0005247	voltage-gated chloride channel activity	molecular_function	0.0019566	0.48611	2	128	11	20361	1.01111e+17
GO:0005254	chloride channel activity	molecular_function	0.0019566	0.48611	2	128	11	20361	1.01111e+17
GO:0008308	voltage-gated anion channel activity	molecular_function	0.0019566	0.48611	2	128	11	20361	1.00126e+17
GO:0015108	chloride transmembrane transporter activity	molecular_function	0.0019566	0.48611	2	128	11	20361	1.01111e+17
GO:0008408	3'-5' exonuclease activity	molecular_function	0.0020828	0.49022	3	128	40	20361	1.01115e+26
GO:0005253	anion channel activity	molecular_function	0.0023903	0.52218	2	128	12	20361	1.00126e+17
GO:0006996	organelle organization	biological_process	0.0026398	0.52218	13	128	915	20361	1.01112e+113
GO:0051640	organelle localization	biological_process	0.0026856	0.52218	2	128	12	20361	1.01115e+17
GO:0051656	establishment of organelle localization	biological_process	0.0026856	0.52218	2	128	12	20361	1.01113e+17
GO:0009267	cellular response to starvation	biological_process	0.0033791	0.55968	2	128	16	20361	1.0111e+17
GO:0031667	response to nutrient levels	biological_process	0.0033791	0.55968	2	128	16	20361	1.0111e+17
GO:0031669	cellular response to nutrient levels	biological_process	0.0033791	0.55968	2	128	16	20361	1.0111e+17
GO:0042594	response to starvation	biological_process	0.0033791	0.55968	2	128	16	20361	1.0111e+17
GO:0006821	chloride transport	biological_process	0.0036152	0.57741	2	128	15	20361	1.01111e+17
GO:0009405	pathogenesis	biological_process	0.0051267	0.79058	8	128	442	20361	1.01119e+71
GO:0006325	chromatin organization	biological_process	0.0059397	0.88541	4	128	129	20361	1.01114e+35
GO:0005576	extracellular region	cellular_component	0.0066679	0.91428	18	128	1623	20361	1.01105e+158
GO:0071103	DNA conformation change	biological_process	0.0068007	0.91428	4	128	137	20361	1.01112e+35
GO:0052636	arabinosyltransferase activity	molecular_function	0.0069511	0.91428	1	128	1	20361	101110286
GO:0071766	Actinobacterium-type cell wall biogenesis	biological_process	0.0069511	0.91428	1	128	1	20361	101110286
GO:0004553	hydrolase activity, hydrolyzing O-glycosyl compounds	molecular_function	0.0096502	1	5	128	214	20361	1.01104e+41
GO:0008200	ion channel inhibitor activity	molecular_function	0.0099725	1	4	128	136	20361	1.06991e+35
GO:0016248	channel inhibitor activity	molecular_function	0.0099725	1	4	128	136	20361	1.00535e+35
GO:0008509	anion transmembrane transporter activity	molecular_function	0.01025	1	4	128	140	20361	1.00126e+35
GO:0006790	sulfur compound metabolic process	biological_process	0.01208	1	3	128	76	20361	1.01102e+26
GO:0065003	macromolecular complex assembly	biological_process	0.01209	1	8	128	536	20361	1.01112e+71
GO:0005669	transcription factor TFIID complex	cellular_component	0.012355	1	2	128	37	20361	1.01114e+17
GO:0004555	alpha,alpha-trehalase activity	molecular_function	0.01273	1	1	128	2	20361	101103668
GO:0015927	trehalase activity	molecular_function	0.01273	1	1	128	2	20361	101103668
GO:0016247	channel regulator activity	molecular_function	0.013168	1	4	128	148	20361	1.06991e+35
GO:0004057	arginyltransferase activity	molecular_function	0.01384	1	1	128	2	20361	101110286
GO:0016598	protein arginylation	biological_process	0.01384	1	1	128	2	20361	101110286
GO:0004527	exonuclease activity	molecular_function	0.014388	1	4	128	154	20361	1.01115e+35
GO:0022607	cellular component assembly	biological_process	0.014875	1	10	128	791	20361	1.01112e+89
GO:0044085	cellular component biogenesis	biological_process	0.015154	1	11	128	917	20361	1.01114e+98
GO:0016798	hydrolase activity, acting on glycosyl bonds	molecular_function	0.016	1	5	128	243	20361	1.01104e+41
GO:0001503	ossification	biological_process	0.016071	1	2	128	32	20361	443058101105393
GO:0048284	organelle fusion	biological_process	0.016602	1	2	128	33	20361	1.01115e+17
GO:0009273	peptidoglycan-based cell wall biogenesis	biological_process	0.017088	1	1	128	3	20361	101110286
GO:0009987	cellular process	biological_process	0.017359	1	80	128	12236	20361	101113893,101118138,101103668,101112185,101111928,101112792,101123485,101115166,101112734,101118905,101123312,101103569,100190973,101102489,100125626,101113336,101123169,101119368,101114911,101122993,443058,443125,101104991,101114146,101115374,105615177,101107766,101123226,101111915,101107703,101112321,101110067,101123073,100302545,101115641,101112720,101113584,101107444,101106288,101107357,10111…
GO:0004308	exo-alpha-sialidase activity	molecular_function	0.017506	1	1	128	3	20361	100125626
GO:0016997	alpha-sialidase activity	molecular_function	0.017506	1	1	128	3	20361	100125626
GO:0043933	macromolecular complex subunit organization	biological_process	0.01843	1	8	128	583	20361	1.01114e+71
GO:0005991	trehalose metabolic process	biological_process	0.019549	1	1	128	3	20361	101103668
GO:0009967	positive regulation of signal transduction	biological_process	0.020184	1	2	128	40	20361	1.01106e+17
GO:0010647	positive regulation of cell communication	biological_process	0.020184	1	2	128	40	20361	1.01106e+17
GO:0023056	positive regulation of signaling	biological_process	0.020184	1	2	128	40	20361	1.01106e+17
GO:0071840	cellular component organization or biogenesis	biological_process	0.021053	1	17	128	1727	20361	1.01113e+149
GO:0015103	inorganic anion transmembrane transporter activity	molecular_function	0.021464	1	2	128	37	20361	1.00126e+17
GO:0017172	cysteine dioxygenase activity	molecular_function	0.021603	1	1	128	4	20361	101102489
GO:0046439	L-cysteine metabolic process	biological_process	0.021603	1	1	128	4	20361	101102489
GO:0016043	cellular component organization	biological_process	0.022256	1	16	128	1596	20361	1.0111e+140
GO:0034622	cellular macromolecular complex assembly	biological_process	0.022391	1	6	128	385	20361	1.01114e+53
GO:0005216	ion channel activity	molecular_function	0.025017	1	7	128	469	20361	1.01111e+62
GO:0022838	substrate-specific channel activity	molecular_function	0.025017	1	7	128	469	20361	1.01113e+62
GO:0006944	cellular membrane fusion	biological_process	0.02557	1	2	128	43	20361	1.01107e+17
GO:0015267	channel activity	molecular_function	0.025857	1	7	128	472	20361	1.01111e+62
GO:0022803	passive transmembrane transporter activity	molecular_function	0.025857	1	7	128	472	20361	1.01111e+62
GO:0009991	response to extracellular stimulus	biological_process	0.026609	1	2	128	46	20361	1.01107e+17
GO:0031668	cellular response to extracellular stimulus	biological_process	0.026609	1	2	128	46	20361	1.0111e+17
GO:0071496	cellular response to external stimulus	biological_process	0.026609	1	2	128	46	20361	1.0111e+17
GO:0004517	nitric-oxide synthase activity	molecular_function	0.026819	1	1	128	4	20361	443077
GO:0006809	nitric oxide biosynthetic process	biological_process	0.026819	1	1	128	4	20361	443077
GO:0046209	nitric oxide metabolic process	biological_process	0.026819	1	1	128	4	20361	443077
GO:0043086	negative regulation of catalytic activity	biological_process	0.027265	1	2	128	43	20361	1.0111e+17
GO:0044092	negative regulation of molecular function	biological_process	0.027265	1	2	128	43	20361	1.01112e+17
GO:0006534	cysteine metabolic process	biological_process	0.02743	1	1	128	5	20361	101102489
GO:0019748	secondary metabolic process	biological_process	0.028034	1	2	128	43	20361	443125101112972
GO:0005975	carbohydrate metabolic process	biological_process	0.028687	1	8	128	608	20361	1.01113e+68
GO:0060589	nucleoside-triphosphatase regulator activity	molecular_function	0.029049	1	5	128	278	20361	1.01112e+44
GO:0055085	transmembrane transport	biological_process	0.029353	1	11	128	946	20361	1.01103e+98
GO:0051179	localization	biological_process	0.030384	1	26	128	2998	20361	101118138,101114570,101114398,101103060,101107766,101103782,101111928,101113325,101123485,101112734,780443,101111082,101107444,101110067,101115166,101105242,101113062,101114641,101123169,101114652,101114911,101119275,101123312,101103569,101113305,100125626
GO:0006820	anion transport	biological_process	0.031146	1	4	128	198	20361	1.01111e+35
GO:0000281	mitotic cytokinesis	biological_process	0.031154	1	1	128	5	20361	101112734
GO:0040001	establishment of mitotic spindle localization	biological_process	0.031154	1	1	128	5	20361	101112734
GO:0051293	establishment of spindle localization	biological_process	0.031154	1	1	128	5	20361	101112734
GO:0051653	spindle localization	biological_process	0.031154	1	1	128	5	20361	101112734
GO:0007155	cell adhesion	biological_process	0.031316	1	6	128	388	20361	4.43058e+50
GO:0009186	deoxyribonucleoside diphosphate metabolic process	biological_process	0.032226	1	1	128	5	20361	101112185
GO:0006895	Golgi to endosome transport	biological_process	0.032503	1	1	128	5	20361	101114570
GO:0006903	vesicle targeting	biological_process	0.032503	1	1	128	5	20361	101114570
GO:0007162	negative regulation of cell adhesion	biological_process	0.032503	1	1	128	5	20361	101114570
GO:0010721	negative regulation of cell development	biological_process	0.032503	1	1	128	5	20361	101114570
GO:0010769	regulation of cell morphogenesis involved in differentiation	biological_process	0.032503	1	1	128	5	20361	101114570
GO:0010771	negative regulation of cell morphogenesis involved in differentiation	biological_process	0.032503	1	1	128	5	20361	101114570
GO:0010810	regulation of cell-substrate adhesion	biological_process	0.032503	1	1	128	5	20361	101114570
GO:0010812	negative regulation of cell-substrate adhesion	biological_process	0.032503	1	1	128	5	20361	101114570
GO:0034315	regulation of Arp2/3 complex-mediated actin nucleation	biological_process	0.032503	1	1	128	5	20361	101114570
GO:0034446	substrate adhesion-dependent cell spreading	biological_process	0.032503	1	1	128	5	20361	101114570
GO:0035650	AP-1 adaptor complex binding	molecular_function	0.032503	1	1	128	5	20361	101114570
GO:0045596	negative regulation of cell differentiation	biological_process	0.032503	1	1	128	5	20361	101114570
GO:0048199	vesicle targeting, to, from or within Golgi	biological_process	0.032503	1	1	128	5	20361	101114570
GO:0048203	vesicle targeting, trans-Golgi to endosome	biological_process	0.032503	1	1	128	5	20361	101114570
GO:0051093	negative regulation of developmental process	biological_process	0.032503	1	1	128	5	20361	101114570
GO:0051125	regulation of actin nucleation	biological_process	0.032503	1	1	128	5	20361	101114570
GO:0060284	regulation of cell development	biological_process	0.032503	1	1	128	5	20361	101114570
GO:1900024	regulation of substrate adhesion-dependent cell spreading	biological_process	0.032503	1	1	128	5	20361	101114570
GO:1900025	negative regulation of substrate adhesion-dependent cell spreading	biological_process	0.032503	1	1	128	5	20361	101114570
GO:0022610	biological adhesion	biological_process	0.033907	1	6	128	396	20361	1.01107e+50
GO:0051276	chromosome organization	biological_process	0.03594	1	4	128	218	20361	1.01106e+35
GO:0005199	structural constituent of cell wall	molecular_function	0.036341	1	1	128	7	20361	101113488
GO:0004357	glutamate-cysteine ligase activity	molecular_function	0.037288	1	1	128	6	20361	101123429
GO:0009251	glucan catabolic process	biological_process	0.037533	1	1	128	7	20361	101113336
GO:0030245	cellulose catabolic process	biological_process	0.037533	1	1	128	7	20361	101113336
GO:0044247	cellular polysaccharide catabolic process	biological_process	0.037533	1	1	128	7	20361	101113336
GO:0051275	beta-glucan catabolic process	biological_process	0.037533	1	1	128	7	20361	101113336
GO:0031503	protein complex localization	biological_process	0.037836	1	1	128	6	20361	101112734
GO:0044699	single-organism process	biological_process	0.039047	1	55	128	8130	20361	101111928,101112792,101123485,101113325,100534656,101113893,101118138,443004,101113305,101123312,101103569,100145880,100125626,101113062,101123169,101119275,101114911,101112972,101109809,101115166,101118905,101112734,780443,101104991,101114146,101115374,101107766,101110286,101103782,101103060,101122993,101104174,101114570,101113728,101114398,443058,443330,101106288,101107357,101114641,101114652,1…
GO:0001933	negative regulation of protein phosphorylation	biological_process	0.039588	1	1	128	6	20361	101109727
GO:0004862	cAMP-dependent protein kinase inhibitor activity	molecular_function	0.039588	1	1	128	6	20361	101109727
GO:0006469	negative regulation of protein kinase activity	biological_process	0.039588	1	1	128	6	20361	101109727
GO:0010563	negative regulation of phosphorus metabolic process	biological_process	0.039588	1	1	128	6	20361	101109727
GO:0031400	negative regulation of protein modification process	biological_process	0.039588	1	1	128	6	20361	101109727
GO:0033673	negative regulation of kinase activity	biological_process	0.039588	1	1	128	6	20361	101109727
GO:0042326	negative regulation of phosphorylation	biological_process	0.039588	1	1	128	6	20361	101109727
GO:0045936	negative regulation of phosphate metabolic process	biological_process	0.039588	1	1	128	6	20361	101109727
GO:0051348	negative regulation of transferase activity	biological_process	0.039588	1	1	128	6	20361	101109727
GO:0006906	vesicle fusion	biological_process	0.040488	1	1	128	6	20361	101107444
GO:0048280	vesicle fusion with Golgi apparatus	biological_process	0.040488	1	1	128	6	20361	101107444
GO:0008593	regulation of Notch signaling pathway	biological_process	0.040501	1	1	128	10	20361	101107703
GO:0045747	positive regulation of Notch signaling pathway	biological_process	0.040501	1	1	128	10	20361	101107703
GO:0040013	negative regulation of locomotion	biological_process	0.042671	1	1	128	7	20361	101114570
GO:0051271	negative regulation of cellular component movement	biological_process	0.042671	1	1	128	7	20361	101114570
GO:2000146	negative regulation of cell motility	biological_process	0.042671	1	1	128	7	20361	101114570
GO:0009057	macromolecule catabolic process	biological_process	0.045164	1	4	128	229	20361	1.01112e+35
GO:0030176	integral to endoplasmic reticulum membrane	cellular_component	0.045625	1	2	128	60	20361	1.01104e+17
GO:0031227	intrinsic to endoplasmic reticulum membrane	cellular_component	0.045625	1	2	128	60	20361	1.01115e+17
GO:0051648	vesicle localization	biological_process	0.046072	1	1	128	7	20361	101114570
GO:0051650	establishment of vesicle localization	biological_process	0.046072	1	1	128	7	20361	101114570
GO:0000139	Golgi membrane	cellular_component	0.046662	1	2	128	54	20361	101107444780443
GO:0005984	disaccharide metabolic process	biological_process	0.047034	1	1	128	8	20361	101103668
GO:0044262	cellular carbohydrate metabolic process	biological_process	0.047661	1	2	128	59	20361	1.01113e+17
GO:0048584	positive regulation of response to stimulus	biological_process	0.047742	1	2	128	64	20361	1.01108e+17
GO:0002115	store-operated calcium entry	biological_process	0.048353	1	1	128	8	20361	101103782
GO:0010959	regulation of metal ion transport	biological_process	0.048353	1	1	128	8	20361	101103782
GO:0043269	regulation of ion transport	biological_process	0.048353	1	1	128	8	20361	101103782
GO:0051924	regulation of calcium ion transport	biological_process	0.048353	1	1	128	8	20361	101103782
GO:2001256	regulation of store-operated calcium entry	biological_process	0.048353	1	1	128	8	20361	101103782
GO:0051234	establishment of localization	biological_process	0.049219	1	24	128	2845	20361	1.01123e+212
GO:0048870	cell motility	biological_process	0.04959	1	3	128	138	20361	1.01108e+26
GO:0051674	localization of cell	biological_process	0.04959	1	3	128	138	20361	1.01107e+26
GO:0032780	negative regulation of ATPase activity	biological_process	0.049944	1	1	128	9	20361	101111928
GO:0016286	small conductance calcium-activated potassium channel activity	molecular_function	0.050246	1	1	128	8	20361	101110067
GO:0072528	pyrimidine-containing compound biosynthetic process	biological_process	0.051286	1	2	128	61	20361	1.0111e+17
GO:0030695	GTPase regulator activity	molecular_function	0.05388	1	4	128	226	20361	1.01115e+35
GO:0006892	post-Golgi vesicle-mediated transport	biological_process	0.054518	1	1	128	9	20361	101114570
GO:0044765	single-organism transport	biological_process	0.05463	1	19	128	2155	20361	1.01113e+170
GO:0009966	regulation of signal transduction	biological_process	0.054852	1	4	128	231	20361	1.01106e+35
GO:0044763	single-organism cellular process	biological_process	0.054914	1	49	128	7273	20361	101113893,443004,101118138,101123485,101112792,101111928,100534656,101109809,101115166,101118905,101112734,780443,100125626,100145880,101103569,101123312,101119275,101114911,101123169,101103060,101104174,101122993,101113728,101114398,443058,443330,101114570,101115374,101114146,101104991,101110286,101107766,101112321,101107703,101105393,101113584,101107444,100302545,101111082,101107357,101106288,1…
GO:0042546	cell wall biogenesis	biological_process	0.055008	1	1	128	9	20361	101110286
GO:0005085	guanyl-nucleotide exchange factor activity	molecular_function	0.056572	1	3	128	134	20361	1.01115e+26
GO:0044275	cellular carbohydrate catabolic process	biological_process	0.057808	1	1	128	11	20361	101113336
GO:0055086	nucleobase-containing small molecule metabolic process	biological_process	0.058347	1	5	128	353	20361	1.0111e+44
GO:0009056	catabolic process	biological_process	0.058786	1	8	128	703	20361	1.01123e+71
GO:0009372	quorum sensing	biological_process	0.05955	1	1	128	9	20361	101115641
GO:0048872	homeostasis of number of cells	biological_process	0.05955	1	1	128	9	20361	101115641
GO:0048874	homeostasis of number of cells in a free-living population	biological_process	0.05955	1	1	128	9	20361	101115641
GO:0043231	intracellular membrane-bounded organelle	cellular_component	0.059775	1	24	128	2999	20361	7.80443e+212
GO:0004579	dolichyl-diphosphooligosaccharide-protein glycotransferase activity	molecular_function	0.059959	1	1	128	11	20361	101113018
GO:0043227	membrane-bounded organelle	cellular_component	0.06	1	24	128	3000	20361	1.01112e+212
GO:0005578	proteinaceous extracellular matrix	cellular_component	0.060983	1	3	128	147	20361	1.01108e+26
GO:0010646	regulation of cell communication	biological_process	0.061015	1	4	128	239	20361	1.01102e+35
GO:0023051	regulation of signaling	biological_process	0.06149	1	4	128	240	20361	1.01108e+35
GO:0007157	heterophilic cell-cell adhesion	biological_process	0.061528	1	1	128	11	20361	101106613
GO:0006353	DNA-dependent transcription, termination	biological_process	0.061571	1	1	128	11	20361	101122993
GO:0030243	cellulose metabolic process	biological_process	0.063152	1	1	128	12	20361	101113336
GO:0015698	inorganic anion transport	biological_process	0.063512	1	2	128	66	20361	1.00126e+17
GO:0030126	COPI vesicle coat	cellular_component	0.065651	1	1	128	10	20361	780443
GO:0030137	COPI-coated vesicle	cellular_component	0.065651	1	1	128	10	20361	780443
GO:0030663	COPI-coated vesicle membrane	cellular_component	0.065651	1	1	128	10	20361	780443
GO:0045595	regulation of cell differentiation	biological_process	0.066695	1	1	128	11	20361	101114570
GO:0030291	protein serine/threonine kinase inhibitor activity	molecular_function	0.067239	1	1	128	12	20361	101109727
GO:0044421	extracellular region part	cellular_component	0.068071	1	6	128	482	20361	1.01114e+53
GO:0061025	membrane fusion	biological_process	0.068672	1	2	128	73	20361	1.01115e+17
GO:0005667	transcription factor complex	cellular_component	0.068737	1	2	128	79	20361	1.01112e+17
GO:0006750	glutathione biosynthetic process	biological_process	0.069594	1	1	128	11	20361	101123429
GO:0019184	nonribosomal peptide biosynthetic process	biological_process	0.069594	1	1	128	11	20361	101123429
GO:0022604	regulation of cell morphogenesis	biological_process	0.070282	1	1	128	11	20361	101114570
GO:0072527	pyrimidine-containing compound metabolic process	biological_process	0.070386	1	2	128	75	20361	1.01108e+17
GO:0043462	regulation of ATPase activity	biological_process	0.070797	1	1	128	13	20361	101111928
GO:0014065	phosphatidylinositol 3-kinase cascade	biological_process	0.072541	1	1	128	14	20361	101106288
GO:0014066	regulation of phosphatidylinositol 3-kinase cascade	biological_process	0.072541	1	1	128	14	20361	101106288
GO:0014068	positive regulation of phosphatidylinositol 3-kinase cascade	biological_process	0.072541	1	1	128	14	20361	101106288
GO:0043548	phosphatidylinositol 3-kinase binding	molecular_function	0.072541	1	1	128	14	20361	101106288
GO:0048015	phosphatidylinositol-mediated signaling	biological_process	0.072541	1	1	128	14	20361	101106288
GO:0048017	inositol lipid-mediated signaling	biological_process	0.072541	1	1	128	14	20361	101106288
GO:0009069	serine family amino acid metabolic process	biological_process	0.073047	1	1	128	13	20361	101102489
GO:0008810	cellulase activity	molecular_function	0.073247	1	1	128	14	20361	101113336
GO:0016757	transferase activity, transferring glycosyl groups	molecular_function	0.074765	1	5	128	375	20361	1.01114e+44
GO:0004576	oligosaccharyl transferase activity	molecular_function	0.07608	1	1	128	14	20361	101113018
GO:0006810	transport	biological_process	0.077887	1	23	128	2839	20361	1.01119e+203
GO:0031589	cell-substrate adhesion	biological_process	0.078378	1	1	128	12	20361	101114570
GO:0030436	asexual sporulation	biological_process	0.078442	1	1	128	13	20361	101112972
GO:0044427	chromosomal part	cellular_component	0.080611	1	4	128	287	20361	1.01112e+35
GO:0051273	beta-glucan metabolic process	biological_process	0.081637	1	1	128	15	20361	101113336
GO:0000096	sulfur amino acid metabolic process	biological_process	0.081831	1	1	128	14	20361	101102489
GO:0019220	regulation of phosphate metabolic process	biological_process	0.083771	1	2	128	78	20361	1.01112e+17
GO:0051174	regulation of phosphorus metabolic process	biological_process	0.083771	1	2	128	78	20361	1.0111e+17
GO:0008641	small protein activating enzyme activity	molecular_function	0.085491	1	1	128	14	20361	101123226
GO:0009132	nucleoside diphosphate metabolic process	biological_process	0.086084	1	1	128	15	20361	101112185
GO:0022836	gated channel activity	molecular_function	0.087337	1	4	128	277	20361	1.01111e+35
GO:0022839	ion gated channel activity	molecular_function	0.087337	1	4	128	277	20361	1.01111e+35
GO:0004535	poly(A)-specific ribonuclease activity	molecular_function	0.087688	1	1	128	14	20361	101112185
GO:0043043	peptide biosynthetic process	biological_process	0.088733	1	1	128	15	20361	101123429
GO:0043549	regulation of kinase activity	biological_process	0.088963	1	1	128	15	20361	101109727
GO:0045859	regulation of protein kinase activity	biological_process	0.088963	1	1	128	15	20361	101109727
GO:0051338	regulation of transferase activity	biological_process	0.088963	1	1	128	15	20361	101109727
GO:0006811	ion transport	biological_process	0.090092	1	11	128	1163	20361	1.0111e+98
GO:0006206	pyrimidine nucleobase metabolic process	biological_process	0.090144	1	1	128	15	20361	101110067
GO:0019856	pyrimidine nucleobase biosynthetic process	biological_process	0.090144	1	1	128	15	20361	101110067
GO:0006749	glutathione metabolic process	biological_process	0.090783	1	1	128	15	20361	101123429
GO:0048583	regulation of response to stimulus	biological_process	0.091097	1	4	128	280	20361	1.01108e+35
GO:0006468	protein phosphorylation	biological_process	0.092778	1	7	128	617	20361	1.00191e+62
GO:0000175	3'-5'-exoribonuclease activity	molecular_function	0.093986	1	1	128	15	20361	101112185
GO:0004532	exoribonuclease activity	molecular_function	0.093986	1	1	128	15	20361	101112185
GO:0016896	exoribonuclease activity, producing 5'-phosphomonoesters	molecular_function	0.093986	1	1	128	15	20361	101112185
GO:0032269	negative regulation of cellular protein metabolic process	biological_process	0.094908	1	1	128	16	20361	101109727
GO:0051248	negative regulation of protein metabolic process	biological_process	0.094908	1	1	128	16	20361	101109727
GO:0044237	cellular metabolic process	biological_process	0.095012	1	49	128	7223	20361	101113018,101109809,101112606,101105290,101119368,101112972,101122739,101113336,100190973,100145880,101102489,100125626,101113369,101103668,101118138,101113893,101109363,100534656,105605576,101111928,101112792,101112185,101113749,101112720,100302545,101108969,101123073,101110067,101111915,101107703,101107579,101112356,101110402,101107357,101106288,101114398,101115129,443125,101114570,443077,10111…
GO:0000272	polysaccharide catabolic process	biological_process	0.095149	1	1	128	18	20361	101113336
GO:0008150	biological_process	biological_process	0.098546	1	92	128	15203	20361	101107357,101113807,101106288,101102739,101112356,101114652,101114641,101110067,101111915,101107703,101112321,101115641,100302545,101107444,101113584,101112720,101123073,101115374,101114146,101104991,101123226,101123195,105615177,101107766,101122993,443058,443125,101114321,100125626,100190973,101102489,101113336,101114008,101123312,101103569,101119368,101114911,101113062,101123169,101115166,10111…
GO:0009112	nucleobase metabolic process	biological_process	0.10022	1	1	128	17	20361	101110067
GO:0046112	nucleobase biosynthetic process	biological_process	0.10022	1	1	128	17	20361	101110067
GO:0016197	endosomal transport	biological_process	0.10107	1	1	128	16	20361	101114570
GO:0006753	nucleoside phosphate metabolic process	biological_process	0.10148	1	4	128	303	20361	1.01115e+35
GO:0044431	Golgi apparatus part	cellular_component	0.10328	1	2	128	89	20361	101107444780443
GO:0034655	nucleobase-containing compound catabolic process	biological_process	0.10346	1	2	128	87	20361	1.01112e+17
GO:0000103	sulfate assimilation	biological_process	0.10349	1	1	128	17	20361	101103060
GO:0004020	adenylylsulfate kinase activity	molecular_function	0.10349	1	1	128	17	20361	101103060
GO:0005086	ARF guanyl-nucleotide exchange factor activity	molecular_function	0.10514	1	1	128	17	20361	101102247
GO:0032011	ARF protein signal transduction	biological_process	0.10514	1	1	128	17	20361	101102247
GO:0032012	regulation of ARF protein signal transduction	biological_process	0.10514	1	1	128	17	20361	101102247
GO:0044380	protein localization to cytoskeleton	biological_process	0.1055	1	1	128	17	20361	101111928
GO:0071988	protein localization to spindle pole body	biological_process	0.1055	1	1	128	17	20361	101111928
GO:0007264	small GTPase mediated signal transduction	biological_process	0.10573	1	5	128	417	20361	1.00146e+44
GO:0005520	insulin-like growth factor binding	molecular_function	0.10884	1	1	128	21	20361	101106613
GO:0030838	positive regulation of actin filament polymerization	biological_process	0.10919	1	1	128	20	20361	101114570
GO:0031334	positive regulation of protein complex assembly	biological_process	0.10919	1	1	128	20	20361	101114570
GO:0032273	positive regulation of protein polymerization	biological_process	0.10919	1	1	128	20	20361	101114570
GO:0034314	Arp2/3 complex-mediated actin nucleation	biological_process	0.10919	1	1	128	20	20361	101114570
GO:0045010	actin nucleation	biological_process	0.10919	1	1	128	20	20361	101114570
GO:0031300	intrinsic to organelle membrane	cellular_component	0.11033	1	2	128	97	20361	1.01115e+17
GO:0031301	integral to organelle membrane	cellular_component	0.11033	1	2	128	97	20361	1.01115e+17
GO:0016591	DNA-directed RNA polymerase II, holoenzyme	cellular_component	0.11142	1	2	128	105	20361	1.01112e+17
GO:0007010	cytoskeleton organization	biological_process	0.11156	1	5	128	426	20361	1.01112e+41
GO:0001558	regulation of cell growth	biological_process	0.11223	1	1	128	22	20361	101106613
GO:0055036	virion membrane	cellular_component	0.11307	1	1	128	20	20361	100125626
GO:0019239	deaminase activity	molecular_function	0.1156	1	1	128	20	20361	101106352
GO:0042030	ATPase inhibitor activity	molecular_function	0.11589	1	1	128	21	20361	101111928
GO:0019838	growth factor binding	molecular_function	0.11618	1	1	128	23	20361	101106613
GO:0051641	cellular localization	biological_process	0.11971	1	9	128	958	20361	1.01115e+77
GO:0032879	regulation of localization	biological_process	0.12036	1	2	128	95	20361	1.01115e+17
GO:0030153	bacteriocin immunity	biological_process	0.12183	1	1	128	21	20361	443125
GO:1901575	organic substance catabolic process	biological_process	0.12195	1	5	128	440	20361	1.01113e+44
GO:0001932	regulation of protein phosphorylation	biological_process	0.12231	1	1	128	21	20361	101109727
GO:0042151	nematocyst	cellular_component	0.1229	1	1	128	21	20361	100534656
GO:0007265	Ras protein signal transduction	biological_process	0.1235	1	2	128	92	20361	1.01108e+17
GO:0046578	regulation of Ras protein signal transduction	biological_process	0.1235	1	2	128	92	20361	1.01108e+17
GO:0016049	cell growth	biological_process	0.12383	1	1	128	24	20361	101106613
GO:0005509	calcium ion binding	molecular_function	0.12447	1	6	128	554	20361	1.00303e+53
GO:0016709	oxidoreductase activity, acting on paired donors, with incorporation or reduction of molecular oxygen, NAD(P)H as one donor, and incorporation of one atom of oxygen	molecular_function	0.12472	1	1	128	20	20361	443077
GO:0003746	translation elongation factor activity	molecular_function	0.12497	1	1	128	28	20361	101114398
GO:0003854	3-beta-hydroxy-delta5-steroid dehydrogenase activity	molecular_function	0.12542	1	1	128	22	20361	101112792
GO:0016229	steroid dehydrogenase activity	molecular_function	0.12542	1	1	128	22	20361	101112792
GO:0033764	steroid dehydrogenase activity, acting on the CH-OH group of donors, NAD or NADP as acceptor	molecular_function	0.12542	1	1	128	22	20361	101112792
GO:0006073	cellular glucan metabolic process	biological_process	0.12658	1	1	128	23	20361	101113336
GO:0044042	glucan metabolic process	biological_process	0.12658	1	1	128	23	20361	101113336
GO:0005798	Golgi-associated vesicle	cellular_component	0.1268	1	1	128	21	20361	780443
GO:0030660	Golgi-associated vesicle membrane	cellular_component	0.1268	1	1	128	21	20361	780443
GO:0000428	DNA-directed RNA polymerase complex	cellular_component	0.1269	1	2	128	113	20361	1.01112e+17
GO:0030880	RNA polymerase complex	cellular_component	0.1269	1	2	128	113	20361	1.01114e+17
GO:0055029	nuclear DNA-directed RNA polymerase complex	cellular_component	0.1269	1	2	128	113	20361	1.01112e+17
GO:0044446	intracellular organelle part	cellular_component	0.12718	1	15	128	1890	20361	1.01107e+131
GO:0044248	cellular catabolic process	biological_process	0.12736	1	6	128	573	20361	1.0111e+53
GO:0009877	nodulation	biological_process	0.12941	1	1	128	23	20361	101115641
GO:0048468	cell development	biological_process	0.13029	1	2	128	104	20361	1.01105e+17
GO:0043604	amide biosynthetic process	biological_process	0.13046	1	1	128	23	20361	101123429
GO:0004616	phosphogluconate dehydrogenase (decarboxylating) activity	molecular_function	0.13055	1	1	128	22	20361	101112792
GO:0005694	chromosome	cellular_component	0.13056	1	4	128	338	20361	1.01112e+35
GO:0040008	regulation of growth	biological_process	0.13071	1	1	128	26	20361	101106613
GO:0044723	single-organism carbohydrate metabolic process	biological_process	0.13164	1	4	128	331	20361	1.01113e+35
GO:0044422	organelle part	cellular_component	0.13193	1	15	128	1902	20361	1.01112e+131
GO:0070925	organelle assembly	biological_process	0.134	1	2	128	111	20361	1.0111e+17
GO:0004181	metallocarboxypeptidase activity	molecular_function	0.13667	1	1	128	22	20361	101102739
GO:0030234	enzyme regulator activity	molecular_function	0.13717	1	6	128	588	20361	1.01108e+53
GO:0005083	small GTPase regulator activity	molecular_function	0.13904	1	2	128	101	20361	1.01102e+17
GO:0016310	phosphorylation	biological_process	0.13981	1	7	128	695	20361	1.00191e+62
GO:0030155	regulation of cell adhesion	biological_process	0.14116	1	1	128	24	20361	101114570
GO:0006486	protein glycosylation	biological_process	0.14182	1	2	128	111	20361	1.01113e+17
GO:0043413	macromolecule glycosylation	biological_process	0.14182	1	2	128	111	20361	1.01113e+17
GO:0051649	establishment of localization in cell	biological_process	0.14218	1	8	128	862	20361	1.01123e+68
GO:0016044	cellular membrane organization	biological_process	0.1433	1	2	128	112	20361	1.01107e+17
GO:0006414	translational elongation	biological_process	0.1434	1	1	128	32	20361	101114398
GO:0010181	FMN binding	molecular_function	0.14442	1	1	128	26	20361	443077
GO:0008053	mitochondrial fusion	biological_process	0.14513	1	1	128	27	20361	101114652
GO:0071554	cell wall organization or biogenesis	biological_process	0.14577	1	1	128	29	20361	101110286
GO:0070085	glycosylation	biological_process	0.14656	1	2	128	113	20361	1.01113e+17
GO:0012505	endomembrane system	cellular_component	0.14753	1	4	128	343	20361	7.80443e+32
GO:0006221	pyrimidine nucleotide biosynthetic process	biological_process	0.14831	1	1	128	29	20361	101107703
GO:0030474	spindle pole body duplication	biological_process	0.15063	1	1	128	26	20361	101111928
GO:0051300	spindle pole body organization	biological_process	0.15063	1	1	128	26	20361	101111928
GO:0051056	regulation of small GTPase mediated signal transduction	biological_process	0.15133	1	2	128	104	20361	1.01102e+17
GO:0031012	extracellular matrix	cellular_component	0.15169	1	3	128	220	20361	1.01112e+26
GO:0008235	metalloexopeptidase activity	molecular_function	0.15172	1	1	128	25	20361	101102739
GO:0016758	transferase activity, transferring hexosyl groups	molecular_function	0.15268	1	3	128	226	20361	1.01114e+26
GO:0016881	acid-amino acid ligase activity	molecular_function	0.15528	1	3	128	218	20361	1.01123e+26
GO:0009101	glycoprotein biosynthetic process	biological_process	0.15652	1	2	128	118	20361	1.01113e+17
GO:0031399	regulation of protein modification process	biological_process	0.15652	1	1	128	27	20361	101109727
GO:0050790	regulation of catalytic activity	biological_process	0.15881	1	2	128	116	20361	1.0111e+17
GO:0005244	voltage-gated ion channel activity	molecular_function	0.15943	1	2	128	120	20361	1.01111e+17
GO:0022832	voltage-gated channel activity	molecular_function	0.15943	1	2	128	120	20361	1.00126e+17
GO:0016337	cell-cell adhesion	biological_process	0.15964	1	2	128	122	20361	1.01107e+17
GO:0008237	metallopeptidase activity	molecular_function	0.16075	1	3	128	223	20361	4.43125e+23
GO:0005794	Golgi apparatus	cellular_component	0.16115	1	2	128	118	20361	101107444780443
GO:0009100	glycoprotein metabolic process	biological_process	0.16135	1	2	128	120	20361	1.01113e+17
GO:0016050	vesicle organization	biological_process	0.16141	1	1	128	29	20361	101107444
GO:0009404	toxin metabolic process	biological_process	0.1615	1	1	128	29	20361	443125
GO:0008378	galactosyltransferase activity	molecular_function	0.16186	1	1	128	31	20361	101107579
GO:0006796	phosphate-containing compound metabolic process	biological_process	0.16252	1	11	128	1287	20361	1.01115e+98
GO:0004860	protein kinase inhibitor activity	molecular_function	0.16307	1	1	128	30	20361	101109727
GO:0019210	kinase inhibitor activity	molecular_function	0.16307	1	1	128	30	20361	101109727
GO:0042325	regulation of phosphorylation	biological_process	0.16348	1	1	128	30	20361	101109727
GO:0001539	ciliary or bacterial-type flagellar motility	biological_process	0.16407	1	1	128	31	20361	101107766
GO:0071973	bacterial-type flagellar cell motility	biological_process	0.16407	1	1	128	31	20361	101107766
GO:0006694	steroid biosynthetic process	biological_process	0.16529	1	1	128	32	20361	101112792
GO:0043934	sporulation	biological_process	0.16594	1	1	128	29	20361	101112972
GO:0007219	Notch signaling pathway	biological_process	0.16624	1	1	128	35	20361	101107703
GO:0022603	regulation of anatomical structure morphogenesis	biological_process	0.16625	1	1	128	28	20361	101114570
GO:0022857	transmembrane transporter activity	molecular_function	0.16738	1	12	128	1455	20361	1.01105e+107
GO:0030163	protein catabolic process	biological_process	0.16967	1	2	128	132	20361	1.01123e+17
GO:0006793	phosphorus metabolic process	biological_process	0.17004	1	11	128	1299	20361	1.01109e+98
GO:0051015	actin filament binding	molecular_function	0.17131	1	1	128	29	20361	101119619
GO:0009605	response to external stimulus	biological_process	0.17147	1	2	128	125	20361	1.01107e+17
GO:0046907	intracellular transport	biological_process	0.17195	1	7	128	763	20361	1.01107e+59
GO:0022892	substrate-specific transporter activity	molecular_function	0.17265	1	11	128	1332	20361	1.01113e+98
GO:0003677	DNA binding	molecular_function	0.17327	1	18	128	2483	20361	1.01114e+161
GO:0015075	ion transmembrane transporter activity	molecular_function	0.17439	1	10	128	1191	20361	1.01111e+89
GO:0044270	cellular nitrogen compound catabolic process	biological_process	0.17548	1	2	128	123	20361	1.01112e+17
GO:0046700	heterocycle catabolic process	biological_process	0.17548	1	2	128	123	20361	1.01112e+17
GO:0051346	negative regulation of hydrolase activity	biological_process	0.17594	1	1	128	33	20361	101111928
GO:0004518	nuclease activity	molecular_function	0.17594	1	4	128	370	20361	1.01115e+35
GO:0065009	regulation of molecular function	biological_process	0.17782	1	2	128	125	20361	1.0111e+17
GO:0006402	mRNA catabolic process	biological_process	0.17933	1	1	128	31	20361	101112185
GO:0016796	exonuclease activity, active with either ribo- or deoxyribonucleic acids and producing 5'-phosphomonoesters	molecular_function	0.18008	1	2	128	128	20361	1.01114e+17
GO:0044264	cellular polysaccharide metabolic process	biological_process	0.18027	1	1	128	33	20361	101113336
GO:0033644	host cell membrane	cellular_component	0.18067	1	1	128	32	20361	100125626
GO:0044218	other organism cell membrane	cellular_component	0.18067	1	1	128	32	20361	100125626
GO:0044279	other organism membrane	cellular_component	0.18067	1	1	128	32	20361	100125626
GO:0051270	regulation of cellular component movement	biological_process	0.18157	1	1	128	32	20361	101114570
GO:2000145	regulation of cell motility	biological_process	0.18157	1	1	128	32	20361	101114570
GO:0006816	calcium ion transport	biological_process	0.18166	1	1	128	32	20361	101103782
GO:0016755	transferase activity, transferring amino-acyl groups	molecular_function	0.18169	1	1	128	33	20361	101110286
GO:0005227	calcium activated cation channel activity	molecular_function	0.18324	1	1	128	32	20361	101110067
GO:0015269	calcium-activated potassium channel activity	molecular_function	0.18324	1	1	128	32	20361	101110067
GO:0051495	positive regulation of cytoskeleton organization	biological_process	0.1835	1	1	128	33	20361	101114570
GO:0003676	nucleic acid binding	molecular_function	0.18371	1	26	128	3829	20361	101110067,101112606,101111915,101112856,100302545,101113108,101106288,101113369,101119368,101111669,101105290,101112356,101103060,101122993,101113893,101114398,101115129,101113632,101114146,105605576,101112185,101107846,101103918,101123429,100534656,101107766
GO:0006220	pyrimidine nucleotide metabolic process	biological_process	0.18633	1	1	128	39	20361	101107703
GO:0004180	carboxypeptidase activity	molecular_function	0.18719	1	1	128	31	20361	101102739
GO:0008064	regulation of actin polymerization or depolymerization	biological_process	0.18869	1	1	128	37	20361	101114570
GO:0008154	actin polymerization or depolymerization	biological_process	0.18869	1	1	128	37	20361	101114570
GO:0030041	actin filament polymerization	biological_process	0.18869	1	1	128	37	20361	101114570
GO:0030832	regulation of actin filament length	biological_process	0.18869	1	1	128	37	20361	101114570
GO:0030833	regulation of actin filament polymerization	biological_process	0.18869	1	1	128	37	20361	101114570
GO:0032271	regulation of protein polymerization	biological_process	0.18869	1	1	128	37	20361	101114570
GO:0032535	regulation of cellular component size	biological_process	0.18869	1	1	128	37	20361	101114570
GO:0032956	regulation of actin cytoskeleton organization	biological_process	0.18869	1	1	128	37	20361	101114570
GO:0032970	regulation of actin filament-based process	biological_process	0.18869	1	1	128	37	20361	101114570
GO:0043254	regulation of protein complex assembly	biological_process	0.18869	1	1	128	37	20361	101114570
GO:1901361	organic cyclic compound catabolic process	biological_process	0.18986	1	2	128	129	20361	1.01112e+17
GO:0040012	regulation of locomotion	biological_process	0.19059	1	1	128	34	20361	101114570
GO:0051258	protein polymerization	biological_process	0.19387	1	2	128	141	20361	1.01115e+17
GO:0019439	aromatic compound catabolic process	biological_process	0.19759	1	2	128	132	20361	1.01112e+17
GO:0005634	nucleus	cellular_component	0.1982	1	15	128	2025	20361	1.01123e+134
GO:0005801	cis-Golgi network	cellular_component	0.1982	1	1	128	38	20361	101123169
GO:0031023	microtubule organizing center organization	biological_process	0.19824	1	1	128	35	20361	101111928
GO:0006401	RNA catabolic process	biological_process	0.19955	1	1	128	35	20361	101112185
GO:0006140	regulation of nucleotide metabolic process	biological_process	0.20004	1	1	128	35	20361	101111928
GO:0009118	regulation of nucleoside metabolic process	biological_process	0.20004	1	1	128	35	20361	101111928
GO:0030811	regulation of nucleotide catabolic process	biological_process	0.20004	1	1	128	35	20361	101111928
GO:0033121	regulation of purine nucleotide catabolic process	biological_process	0.20004	1	1	128	35	20361	101111928
GO:1900542	regulation of purine nucleotide metabolic process	biological_process	0.20004	1	1	128	35	20361	101111928
GO:0006928	cellular component movement	biological_process	0.20076	1	3	128	250	20361	1.01108e+26
GO:0040011	locomotion	biological_process	0.20086	1	3	128	256	20361	1.01108e+26
GO:0006914	autophagy	biological_process	0.20316	1	3	128	261	20361	1.0111e+26
GO:0016773	phosphotransferase activity, alcohol group as acceptor	molecular_function	0.20469	1	8	128	914	20361	1.00191e+71
GO:0005215	transporter activity	molecular_function	0.20528	1	13	128	1668	20361	1.01113e+116
GO:0006195	purine nucleotide catabolic process	biological_process	0.20558	1	1	128	36	20361	101111928
GO:0072523	purine-containing compound catabolic process	biological_process	0.20558	1	1	128	36	20361	101111928
GO:0010638	positive regulation of organelle organization	biological_process	0.20626	1	1	128	38	20361	101114570
GO:0017080	sodium channel regulator activity	molecular_function	0.20748	1	1	128	38	20361	101107579
GO:0019871	sodium channel inhibitor activity	molecular_function	0.20748	1	1	128	38	20361	101107579
GO:0019887	protein kinase regulator activity	molecular_function	0.20749	1	1	128	42	20361	101109727
GO:0051704	multi-organism process	biological_process	0.20826	1	10	128	1257	20361	1.01119e+89
GO:0022891	substrate-specific transmembrane transporter activity	molecular_function	0.20944	1	10	128	1244	20361	1.0111e+89
GO:0005874	microtubule	cellular_component	0.21127	1	1	128	40	20361	101112734
GO:0005272	sodium channel activity	molecular_function	0.21297	1	1	128	39	20361	101113062
GO:0008202	steroid metabolic process	biological_process	0.2148	1	1	128	43	20361	101112792
GO:0009311	oligosaccharide metabolic process	biological_process	0.21641	1	1	128	42	20361	101103668
GO:0050776	regulation of immune response	biological_process	0.21653	1	1	128	45	20361	101106288
GO:0044281	small molecule metabolic process	biological_process	0.21722	1	8	128	890	20361	1.01102e+71
GO:0044767	single-organism developmental process	biological_process	0.21733	1	3	128	273	20361	1.01115e+26
GO:0006518	peptide metabolic process	biological_process	0.21856	1	1	128	41	20361	101123429
GO:0000904	cell morphogenesis involved in differentiation	biological_process	0.2198	1	1	128	39	20361	101114570
GO:0003779	actin binding	molecular_function	0.22003	1	3	128	271	20361	1.01123e+23
GO:0051130	positive regulation of cellular component organization	biological_process	0.22148	1	1	128	42	20361	101114570
GO:0016301	kinase activity	molecular_function	0.2216	1	9	128	1088	20361	1.01109e+80
GO:0016787	hydrolase activity	molecular_function	0.22382	1	24	128	3421	20361	1.01103e+206
GO:0000226	microtubule cytoskeleton organization	biological_process	0.22394	1	2	128	145	20361	1.01113e+17
GO:0061024	membrane organization	biological_process	0.2247	1	2	128	150	20361	1.01115e+17
GO:0044087	regulation of cellular component biogenesis	biological_process	0.2277	1	1	128	46	20361	101114570
GO:0016879	ligase activity, forming carbon-nitrogen bonds	molecular_function	0.23459	1	3	128	272	20361	1.01119e+26
GO:0043229	intracellular organelle	cellular_component	0.23507	1	27	128	4225	20361	101113632,101113893,101103782,101123226,101107766,100534656,101114146,101112792,101111928,101112185,101113018,101113749,101107444,780443,101112734,101112606,101111915,101105290,101114641,101123169,101114652,101112356,101110402,100125626,101107333,101113369,101106288
GO:0043226	organelle	cellular_component	0.23557	1	27	128	4226	20361	101112734,780443,101113749,101107444,101113018,101111915,101112606,101112356,101114641,101123169,101114652,101105290,101106288,101113369,100125626,101107333,101110402,101113632,101113893,100534656,101107766,101103782,101123226,101112185,101111928,101112792,101114146
GO:0051049	regulation of transport	biological_process	0.23713	1	1	128	42	20361	101103782
GO:0006464	cellular protein modification process	biological_process	0.2381	1	11	128	1419	20361	1.01109e+98
GO:0036211	protein modification process	biological_process	0.2381	1	11	128	1419	20361	1.01109e+98
GO:0044265	cellular macromolecule catabolic process	biological_process	0.23849	1	2	128	161	20361	1.01112e+17
GO:0048193	Golgi vesicle transport	biological_process	0.23906	1	2	128	160	20361	1.01107e+17
GO:0002682	regulation of immune system process	biological_process	0.24278	1	1	128	51	20361	101106288
GO:0034613	cellular protein localization	biological_process	0.24377	1	6	128	697	20361	1.01123e+50
GO:0070727	cellular macromolecule localization	biological_process	0.24377	1	6	128	697	20361	1.01123e+50
GO:0007015	actin filament organization	biological_process	0.24415	1	1	128	53	20361	101114570
GO:0005783	endoplasmic reticulum	cellular_component	0.24521	1	3	128	296	20361	1.01104e+26
GO:0009166	nucleotide catabolic process	biological_process	0.24581	1	1	128	45	20361	101111928
GO:0008104	protein localization	biological_process	0.24644	1	7	128	847	20361	1.01113e+59
GO:0044272	sulfur compound biosynthetic process	biological_process	0.24747	1	1	128	45	20361	101123429
GO:1901292	nucleoside phosphate catabolic process	biological_process	0.24866	1	1	128	46	20361	101111928
GO:1901363	heterocyclic compound binding	molecular_function	0.24886	1	37	128	5697	20361	101113584,101112720,101108969,100302545,101123073,101110067,101112856,101111915,101119786,101112356,101106288,101114398,101115129,443077,101113632,101103060,101122993,101103918,101107766,101123429,101114146,780508,101113108,101112606,101105290,101111669,101119368,101122739,100145880,100190973,101113369,101113893,101109363,101107846,100534656,105605576,101112185
GO:0097159	organic cyclic compound binding	molecular_function	0.24932	1	37	128	5698	20361	101113584,101112720,101108969,100302545,101123073,101110067,101112856,101111915,101119786,101112356,101106288,101114398,101115129,443077,101113632,101103060,101122993,101103918,101107766,101123429,101114146,780508,101113108,101112606,101105290,101111669,101119368,101122739,100190973,100145880,101113369,101113893,101109363,101107846,100534656,105605576,101112185
GO:0004190	aspartic-type endopeptidase activity	molecular_function	0.25015	1	2	128	169	20361	1.01113e+17
GO:0070001	aspartic-type peptidase activity	molecular_function	0.25015	1	2	128	169	20361	1.01123e+17
GO:0009117	nucleotide metabolic process	biological_process	0.25026	1	3	128	297	20361	1.01112e+26
GO:0033036	macromolecule localization	biological_process	0.25612	1	8	128	1008	20361	1.01123e+68
GO:0044724	single-organism carbohydrate catabolic process	biological_process	0.25802	1	1	128	51	20361	101113336
GO:0034641	cellular nitrogen compound metabolic process	biological_process	0.25877	1	29	128	4359	20361	101113893,101122993,443077,101114570,101113632,101115129,101112185,101111928,101112792,101114146,105605576,105615177,101123429,100534656,101123226,101112606,101111915,101107703,101110067,101123073,100302545,101113749,101106288,101113369,100145880,101110402,101112356,101119368,101105290
GO:0044238	primary metabolic process	biological_process	0.26212	1	48	128	7653	20361	101112792,101111928,101112185,105605576,100534656,101109363,101113893,101103668,101118389,101113369,101114008,101113336,101102489,100190973,100125626,101122739,101105290,101112972,101119368,101112606,101113018,101114146,105615177,101123429,101110286,101109727,101123226,101122993,101114570,101113632,101115129,443125,101114398,101106288,101110402,101113807,101112356,101107579,101102739,101107703,10…
GO:0060590	ATPase regulator activity	molecular_function	0.26263	1	1	128	53	20361	101111928
GO:0051128	regulation of cellular component organization	biological_process	0.26345	1	2	128	173	20361	1.01115e+17
GO:0044271	cellular nitrogen compound biosynthetic process	biological_process	0.26485	1	19	128	2780	20361	1.05606e+167
GO:0048522	positive regulation of cellular process	biological_process	0.26581	1	3	128	306	20361	1.01115e+26
GO:0016702	oxidoreductase activity, acting on single donors with incorporation of molecular oxygen, incorporation of two atoms of oxygen	molecular_function	0.26934	1	1	128	55	20361	101102489
GO:0051129	negative regulation of cellular component organization	biological_process	0.27419	1	1	128	56	20361	101114570
GO:0005976	polysaccharide metabolic process	biological_process	0.27603	1	1	128	54	20361	101113336
GO:0032268	regulation of cellular protein metabolic process	biological_process	0.27667	1	1	128	55	20361	101109727
GO:0016820	hydrolase activity, acting on acid anhydrides, catalyzing transmembrane movement of substances	molecular_function	0.27679	1	2	128	168	20361	1.01113e+17
GO:0019207	kinase regulator activity	molecular_function	0.27806	1	1	128	58	20361	101109727
GO:0006461	protein complex assembly	biological_process	0.27965	1	4	128	458	20361	1.01114e+35
GO:0005213	structural constituent of chorion	molecular_function	0.27988	1	1	128	57	20361	101104991
GO:0007292	female gamete generation	biological_process	0.27988	1	1	128	57	20361	101104991
GO:0007304	chorion-containing eggshell formation	biological_process	0.27988	1	1	128	57	20361	101104991
GO:0030703	eggshell formation	biological_process	0.27988	1	1	128	57	20361	101104991
GO:0030707	ovarian follicle cell development	biological_process	0.27988	1	1	128	57	20361	101104991
GO:0048477	oogenesis	biological_process	0.27988	1	1	128	57	20361	101104991
GO:1901564	organonitrogen compound metabolic process	biological_process	0.2801	1	8	128	967	20361	1.01108e+71
GO:0070271	protein complex biogenesis	biological_process	0.28079	1	4	128	459	20361	1.01115e+35
GO:0003333	amino acid transmembrane transport	biological_process	0.28114	1	1	128	59	20361	101105242
GO:0031090	organelle membrane	cellular_component	0.28199	1	5	128	615	20361	1.01107e+41
GO:0004672	protein kinase activity	molecular_function	0.2821	1	6	128	712	20361	1.00191e+53
GO:0015171	amino acid transmembrane transporter activity	molecular_function	0.28651	1	1	128	60	20361	101105242
GO:0042398	cellular modified amino acid biosynthetic process	biological_process	0.28745	1	1	128	50	20361	101123429
GO:0006886	intracellular protein transport	biological_process	0.28776	1	5	128	596	20361	1.01107e+41
GO:0051246	regulation of protein metabolic process	biological_process	0.28966	1	1	128	58	20361	101109727
GO:0033993	response to lipid	biological_process	0.29043	1	1	128	54	20361	100534656
GO:0043401	steroid hormone mediated signaling pathway	biological_process	0.29043	1	1	128	54	20361	100534656
GO:0048545	response to steroid hormone stimulus	biological_process	0.29043	1	1	128	54	20361	100534656
GO:0071383	cellular response to steroid hormone stimulus	biological_process	0.29043	1	1	128	54	20361	100534656
GO:0071396	cellular response to lipid	biological_process	0.29043	1	1	128	54	20361	100534656
GO:0071407	cellular response to organic cyclic compound	biological_process	0.29043	1	1	128	54	20361	100534656
GO:0004222	metalloendopeptidase activity	molecular_function	0.29051	1	2	128	176	20361	101107846443125
GO:0043603	cellular amide metabolic process	biological_process	0.29269	1	1	128	58	20361	101123429
GO:0004497	monooxygenase activity	molecular_function	0.29388	1	1	128	55	20361	443077
GO:0007218	neuropeptide signaling pathway	biological_process	0.29503	1	1	128	61	20361	101105242
GO:0016874	ligase activity	molecular_function	0.29678	1	4	128	409	20361	1.01119e+35
GO:0006139	nucleobase-containing compound metabolic process	biological_process	0.29743	1	27	128	4120	20361	101112356,101105290,101119368,101113369,101106288,101110402,101123073,101113749,100302545,101107703,101112606,101111915,101110067,105615177,100534656,101123429,101123226,101111928,101112792,101112185,105605576,101114146,101114570,101113632,101115129,101113893,101122993
GO:0006865	amino acid transport	biological_process	0.30038	1	1	128	64	20361	101105242
GO:0071704	organic substance metabolic process	biological_process	0.30564	1	49	128	7932	20361	105605576,101112185,101111928,101112792,101109363,100534656,101113893,101118389,101103668,100125626,100190973,100145880,101102489,101114008,101113336,101113369,101112972,101119368,101105290,101122739,101112606,101113018,101114146,101123226,101110286,101109727,105615177,101123429,101122993,101115129,101114398,443125,101113632,101114570,101113807,101110402,101106288,101107579,101102739,101112356,10…
GO:0031324	negative regulation of cellular metabolic process	biological_process	0.30603	1	1	128	61	20361	101109727
GO:0005654	nucleoplasm	cellular_component	0.30735	1	3	128	334	20361	1.01114e+26
GO:0044451	nucleoplasm part	cellular_component	0.30735	1	3	128	334	20361	1.0111e+26
GO:0050793	regulation of developmental process	biological_process	0.31076	1	1	128	58	20361	101114570
GO:0016567	protein ubiquitination	biological_process	0.31108	1	1	128	60	20361	101114398
GO:0006807	nitrogen compound metabolic process	biological_process	0.31161	1	30	128	4608	20361	100145880,101102489,101110402,101106288,101113369,101119368,101105290,101112356,101110067,101111915,101107703,101112606,100302545,101113749,101123073,105605576,101114146,101112185,101112792,101111928,101123226,101123429,105615177,100534656,101122993,101113893,101115129,443077,101114570,101113632
GO:0016052	carbohydrate catabolic process	biological_process	0.31222	1	1	128	64	20361	101113336
GO:0048518	positive regulation of biological process	biological_process	0.31323	1	3	128	337	20361	1.01115e+26
GO:0004842	ubiquitin-protein ligase activity	molecular_function	0.31376	1	2	128	182	20361	1.01114e+17
GO:0019787	small conjugating protein ligase activity	molecular_function	0.31376	1	2	128	182	20361	1.01114e+17
GO:0090066	regulation of anatomical structure size	biological_process	0.31388	1	1	128	64	20361	101114570
GO:0030120	vesicle coat	cellular_component	0.31859	1	1	128	63	20361	780443
GO:0030135	coated vesicle	cellular_component	0.31859	1	1	128	63	20361	780443
GO:0030662	coated vesicle membrane	cellular_component	0.31859	1	1	128	63	20361	780443
GO:0051260	protein homooligomerization	biological_process	0.32231	1	1	128	66	20361	101123485
GO:0030154	cell differentiation	biological_process	0.32349	1	2	128	199	20361	1.01115e+17
GO:0016701	oxidoreductase activity, acting on single donors with incorporation of molecular oxygen	molecular_function	0.32434	1	1	128	68	20361	101102489
GO:0030659	cytoplasmic vesicle membrane	cellular_component	0.32508	1	1	128	65	20361	780443
GO:0022412	cellular process involved in reproduction in multicellular organism	biological_process	0.32538	1	1	128	69	20361	101104991
GO:0009653	anatomical structure morphogenesis	biological_process	0.32629	1	2	128	197	20361	1.01115e+17
GO:0005789	endoplasmic reticulum membrane	cellular_component	0.32633	1	2	128	203	20361	1.01115e+17
GO:0010605	negative regulation of macromolecule metabolic process	biological_process	0.32728	1	1	128	66	20361	101109727
GO:0014070	response to organic cyclic compound	biological_process	0.32787	1	1	128	63	20361	100534656
GO:0043412	macromolecule modification	biological_process	0.32825	1	11	128	1547	20361	1.01113e+98
GO:0005615	extracellular space	cellular_component	0.32854	1	2	128	200	20361	1.01119e+17
GO:0012506	vesicle membrane	cellular_component	0.32976	1	1	128	66	20361	780443
GO:0009892	negative regulation of metabolic process	biological_process	0.33011	1	1	128	67	20361	101109727
GO:0009755	hormone-mediated signaling pathway	biological_process	0.33202	1	1	128	64	20361	100534656
GO:0032870	cellular response to hormone stimulus	biological_process	0.33202	1	1	128	64	20361	100534656
GO:0071495	cellular response to endogenous stimulus	biological_process	0.33202	1	1	128	64	20361	100534656
GO:0071822	protein complex subunit organization	biological_process	0.33394	1	4	128	504	20361	1.01114e+35
GO:0032446	protein modification by small protein conjugation	biological_process	0.33496	1	1	128	66	20361	101114398
GO:0044432	endoplasmic reticulum part	cellular_component	0.33635	1	2	128	208	20361	1.01104e+17
GO:0016788	hydrolase activity, acting on ester bonds	molecular_function	0.33895	1	7	128	926	20361	1.0111e+62
GO:0042175	nuclear outer membrane-endoplasmic reticulum membrane network	cellular_component	0.34079	1	2	128	209	20361	1.01115e+17
GO:0044424	intracellular part	cellular_component	0.3416	1	31	128	5082	20361	101112185,101112792,101111928,101114146,100534656,101107766,101123226,101103782,101113893,101113632,101106288,101113369,101107357,101107333,100125626,101110402,101112356,101114652,101123169,101114641,101119368,101105290,101112606,101111915,101109809,780443,101112734,101115641,101113018,101107444,101113749
GO:0048523	negative regulation of cellular process	biological_process	0.3469	1	2	128	210	20361	1.01115e+17
GO:0006163	purine nucleotide metabolic process	biological_process	0.34796	1	2	128	208	20361	1.01112e+17
GO:0046434	organophosphate catabolic process	biological_process	0.34841	1	1	128	69	20361	101111928
GO:0009116	nucleoside metabolic process	biological_process	0.35059	1	2	128	209	20361	1.01112e+17
GO:0071310	cellular response to organic substance	biological_process	0.35138	1	1	128	69	20361	100534656
GO:1901657	glycosyl compound metabolic process	biological_process	0.35181	1	2	128	210	20361	1.01115e+17
GO:0040007	growth	biological_process	0.35428	1	1	128	77	20361	101106613
GO:0005575	cellular_component	cellular_component	0.35437	1	68	128	11755	20361	101115166,101118905,101112734,101114008,100125626,101103569,101123312,101119368,101114911,101123169,101113062,101113893,101123485,101113325,101112792,101111928,101112185,101110067,101112321,101111915,101107703,101107444,100302545,101115641,101107357,101106288,101114652,101114641,101112356,101114321,101114146,101104991,101123195,101123226,101107766,101109809,101109470,101111957,101112606,101113018…
GO:0008219	cell death	biological_process	0.35513	1	2	128	210	20361	1.01119e+17
GO:0016265	death	biological_process	0.35513	1	2	128	210	20361	1.01114e+17
GO:0019637	organophosphate metabolic process	biological_process	0.35631	1	4	128	504	20361	1.01115e+35
GO:0018130	heterocycle biosynthetic process	biological_process	0.35713	1	18	128	2782	20361	1.05615e+161
GO:0035556	intracellular signal transduction	biological_process	0.35873	1	6	128	800	20361	1.01106e+53
GO:0034654	nucleobase-containing compound biosynthetic process	biological_process	0.35947	1	17	128	2626	20361	1.01123e+152
GO:0006576	cellular biogenic amine metabolic process	biological_process	0.36025	1	1	128	74	20361	100145880
GO:0044106	cellular amine metabolic process	biological_process	0.36025	1	1	128	74	20361	100145880
GO:0051336	regulation of hydrolase activity	biological_process	0.36197	1	1	128	73	20361	101111928
GO:0006575	cellular modified amino acid metabolic process	biological_process	0.36378	1	1	128	68	20361	101123429
GO:0072521	purine-containing compound metabolic process	biological_process	0.36386	1	2	128	216	20361	1.01115e+17
GO:0003006	developmental process involved in reproduction	biological_process	0.36604	1	1	128	79	20361	101104991
GO:0005342	organic acid transmembrane transporter activity	molecular_function	0.36647	1	1	128	78	20361	101105242
GO:0046943	carboxylic acid transmembrane transporter activity	molecular_function	0.36647	1	1	128	78	20361	101105242
GO:0015985	energy coupled proton transport, down electrochemical gradient	biological_process	0.36658	1	1	128	82	20361	101114570
GO:0015986	ATP synthesis coupled proton transport	biological_process	0.36658	1	1	128	82	20361	101114570
GO:0009165	nucleotide biosynthetic process	biological_process	0.36747	1	2	128	220	20361	1.01115e+17
GO:1901293	nucleoside phosphate biosynthetic process	biological_process	0.36747	1	2	128	220	20361	1.01115e+17
GO:0030029	actin filament-based process	biological_process	0.36907	1	1	128	80	20361	101114570
GO:0030036	actin cytoskeleton organization	biological_process	0.36907	1	1	128	80	20361	101114570
GO:0008514	organic anion transmembrane transporter activity	molecular_function	0.37522	1	1	128	80	20361	101105242
GO:0046483	heterocycle metabolic process	biological_process	0.37777	1	27	128	4278	20361	100302545,101113749,101123073,101110067,101111915,101107703,101112606,101119368,101105290,101112356,101110402,101106288,101113369,101115129,101113632,101114570,101122993,101113893,101123226,100534656,105615177,101123429,101114146,105605576,101112185,101111928,101112792
GO:1901362	organic cyclic compound biosynthetic process	biological_process	0.37888	1	18	128	2821	20361	1.01123e+161
GO:0032553	ribonucleotide binding	molecular_function	0.38046	1	14	128	2039	20361	1.01103e+119
GO:0051493	regulation of cytoskeleton organization	biological_process	0.38295	1	1	128	80	20361	101114570
GO:0006725	cellular aromatic compound metabolic process	biological_process	0.38298	1	27	128	4289	20361	101114570,101113632,101115129,101113893,101122993,105615177,100534656,101123429,101123226,101111928,101112792,101112185,101114146,105605576,101123073,101113749,100302545,101111915,101107703,101112606,101110067,101112356,101105290,101119368,101113369,101106288,101110402
GO:0070887	cellular response to chemical stimulus	biological_process	0.38371	1	1	128	77	20361	100534656
GO:0005525	GTP binding	molecular_function	0.38857	1	4	128	554	20361	1.00146e+32
GO:0042600	chorion	cellular_component	0.38991	1	1	128	86	20361	101104991
GO:0016763	transferase activity, transferring pentosyl groups	molecular_function	0.39197	1	1	128	84	20361	101110286
GO:0007266	Rho protein signal transduction	biological_process	0.39303	1	1	128	75	20361	101107579
GO:0035023	regulation of Rho protein signal transduction	biological_process	0.39303	1	1	128	75	20361	101107579
GO:0032561	guanyl ribonucleotide binding	molecular_function	0.3936	1	4	128	558	20361	1.01114e+32
GO:0044448	cell cortex part	cellular_component	0.39565	1	1	128	81	20361	100534656
GO:0005096	GTPase activator activity	molecular_function	0.39581	1	1	128	83	20361	101113584
GO:0019001	guanyl nucleotide binding	molecular_function	0.39673	1	4	128	560	20361	1.00146e+32
GO:0006754	ATP biosynthetic process	biological_process	0.39703	1	1	128	90	20361	101114570
GO:0008565	protein transporter activity	molecular_function	0.4006	1	1	128	85	20361	101107444
GO:1901566	organonitrogen compound biosynthetic process	biological_process	0.40513	1	4	128	516	20361	1.01115e+35
GO:0009725	response to hormone stimulus	biological_process	0.40661	1	1	128	84	20361	100534656
GO:1901360	organic cyclic compound metabolic process	biological_process	0.40697	1	27	128	4337	20361	101114570,101113632,101115129,101113893,101122993,105615177,100534656,101123429,101123226,101112792,101111928,101112185,101114146,105605576,101123073,101113749,100302545,101107703,101111915,101112606,101110067,101112356,101105290,101119368,101113369,101106288,101110402
GO:0003924	GTPase activity	molecular_function	0.40704	1	3	128	406	20361	1.00146e+23
GO:0005829	cytosol	cellular_component	0.40844	1	1	128	94	20361	101115641
GO:0006869	lipid transport	biological_process	0.40983	1	1	128	94	20361	101114398
GO:0044433	cytoplasmic vesicle part	cellular_component	0.41138	1	1	128	89	20361	780443
GO:0051213	dioxygenase activity	molecular_function	0.41175	1	1	128	87	20361	101102489
GO:0005088	Ras guanyl-nucleotide exchange factor activity	molecular_function	0.41211	1	1	128	81	20361	101107579
GO:0005089	Rho guanyl-nucleotide exchange factor activity	molecular_function	0.41211	1	1	128	81	20361	101107579
GO:0005929	cilium	cellular_component	0.41391	1	1	128	89	20361	101107444
GO:0031514	motile cilium	cellular_component	0.41391	1	1	128	89	20361	101107444
GO:0005741	mitochondrial outer membrane	cellular_component	0.41393	1	1	128	93	20361	101114652
GO:0031968	organelle outer membrane	cellular_component	0.41393	1	1	128	93	20361	101114652
GO:0005261	cation channel activity	molecular_function	0.41408	1	2	128	236	20361	1.0111e+17
GO:1901137	carbohydrate derivative biosynthetic process	biological_process	0.41499	1	3	128	390	20361	1.01108e+26
GO:0006351	transcription, DNA-dependent	biological_process	0.41563	1	15	128	2381	20361	1.00303e+134
GO:1901135	carbohydrate derivative metabolic process	biological_process	0.41832	1	4	128	548	20361	1.01112e+35
GO:0007017	microtubule-based process	biological_process	0.41934	1	2	128	231	20361	1.01112e+17
GO:0048646	anatomical structure formation involved in morphogenesis	biological_process	0.41959	1	1	128	92	20361	101104991
GO:0016192	vesicle-mediated transport	biological_process	0.42225	1	3	128	395	20361	1.01107e+23
GO:0022900	electron transport chain	biological_process	0.42685	1	1	128	96	20361	101118138
GO:0046034	ATP metabolic process	biological_process	0.42766	1	1	128	100	20361	101114570
GO:0004857	enzyme inhibitor activity	molecular_function	0.42805	1	2	128	253	20361	1.0111e+17
GO:0008135	translation factor activity, nucleic acid binding	molecular_function	0.42834	1	1	128	104	20361	101114398
GO:0009142	nucleoside triphosphate biosynthetic process	biological_process	0.43072	1	1	128	100	20361	101114570
GO:0009145	purine nucleoside triphosphate biosynthetic process	biological_process	0.43072	1	1	128	100	20361	101114570
GO:0009201	ribonucleoside triphosphate biosynthetic process	biological_process	0.43072	1	1	128	100	20361	101114570
GO:0009206	purine ribonucleoside triphosphate biosynthetic process	biological_process	0.43072	1	1	128	100	20361	101114570
GO:0032774	RNA biosynthetic process	biological_process	0.43166	1	15	128	2407	20361	1.01114e+134
GO:0007005	mitochondrion organization	biological_process	0.43547	1	1	128	98	20361	101114652
GO:0005739	mitochondrion	cellular_component	0.43559	1	3	128	431	20361	1.01112e+26
GO:0006511	ubiquitin-dependent protein catabolic process	biological_process	0.43728	1	1	128	99	20361	101110286
GO:0009719	response to endogenous stimulus	biological_process	0.43796	1	1	128	93	20361	100534656
GO:0044260	cellular macromolecule metabolic process	biological_process	0.43929	1	35	128	5916	20361	101114146,101123429,105615177,101109727,101110286,101123226,101122993,101113632,101114398,101106288,101110402,101112356,101107579,101111915,101123073,101113749,101112720,101108969,100302545,101112792,101112185,105605576,100534656,101109363,101113893,101113369,101113336,100125626,100190973,101122739,101105290,101119368,101112972,101112606,101113018
GO:0019941	modification-dependent protein catabolic process	biological_process	0.44015	1	1	128	100	20361	101110286
GO:0043632	modification-dependent macromolecule catabolic process	biological_process	0.44015	1	1	128	100	20361	101110286
GO:0019438	aromatic compound biosynthetic process	biological_process	0.44063	1	17	128	2755	20361	1.01114e+152
GO:0005622	intracellular	cellular_component	0.44075	1	32	128	5450	20361	100534656,101112792,101111928,101112185,101113893,101123169,101105290,101119368,101113369,101107333,100125626,780443,101112734,101113018,101112606,101109809,101107766,101103782,101123226,101114146,101113632,101114398,101114641,101114652,101112356,101106288,101110402,101107357,101107444,101113749,101115641,101111915
GO:0048519	negative regulation of biological process	biological_process	0.44159	1	2	128	253	20361	1.0111e+17
GO:0048869	cellular developmental process	biological_process	0.44161	1	2	128	258	20361	1.01105e+17
GO:0000902	cell morphogenesis	biological_process	0.44211	1	1	128	98	20361	101114570
GO:0032989	cellular component morphogenesis	biological_process	0.44211	1	1	128	98	20361	101114570
GO:0006520	cellular amino acid metabolic process	biological_process	0.44516	1	3	128	335	20361	1.01102e+26
GO:0005938	cell cortex	cellular_component	0.44584	1	1	128	94	20361	100534656
GO:0006814	sodium ion transport	biological_process	0.44584	1	1	128	95	20361	101113062
GO:0009308	amine metabolic process	biological_process	0.44625	1	1	128	100	20361	100145880
GO:0008152	metabolic process	biological_process	0.44628	1	55	128	9284	20361	105605576,101112185,101111928,101112792,101109363,100534656,101113893,101118138,101118389,101103668,100125626,100190973,100145880,101102489,101114008,101113336,101113369,101112972,101119368,101105290,101122739,101109809,101112606,101113018,101114146,101123226,101123195,101110286,101109727,105615177,101123429,101103060,101122993,101115129,443125,101114398,443077,101113632,101114570,101113807,10110…
GO:0019954	asexual reproduction	biological_process	0.45249	1	1	128	104	20361	101112972
GO:0005577	fibrinogen complex	cellular_component	0.45317	1	1	128	104	20361	101114398
GO:0030168	platelet activation	biological_process	0.45317	1	1	128	104	20361	101114398
GO:0000166	nucleotide binding	molecular_function	0.45362	1	15	128	2299	20361	1.01114e+128
GO:1901265	nucleoside phosphate binding	molecular_function	0.45362	1	15	128	2299	20361	1.0111e+128
GO:0005230	extracellular ligand-gated ion channel activity	molecular_function	0.45433	1	1	128	96	20361	101113305
GO:0019031	viral envelope	cellular_component	0.45442	1	2	128	265	20361	780443101112792
GO:0036338	viral membrane	cellular_component	0.45442	1	2	128	265	20361	101112792780443
GO:0007156	homophilic cell adhesion	biological_process	0.45658	1	1	128	102	20361	101104991
GO:0008047	enzyme activator activity	molecular_function	0.46086	1	1	128	105	20361	101113584
GO:0006508	proteolysis	biological_process	0.46469	1	5	128	769	20361	1.01113e+41
GO:0007276	gamete generation	biological_process	0.46715	1	1	128	110	20361	101104991
GO:0016020	membrane	cellular_component	0.46776	1	38	128	6737	20361	101112792,101123485,101113325,780443,780508,101113018,101111957,101109470,101115166,101113488,101113062,101123169,101112972,101114911,101119275,101103569,101123312,101113305,100125626,101114008,443330,101105539,101104174,101103060,101107766,101103782,101104991,101111082,101115641,101107444,101110067,101122766,101105242,101114652,101114641,101107579,101106613,101106288
GO:0035639	purine ribonucleoside triphosphate binding	molecular_function	0.47304	1	13	128	2006	20361	1.01123e+113
GO:0010033	response to organic substance	biological_process	0.47334	1	1	128	104	20361	100534656
GO:0016023	cytoplasmic membrane-bounded vesicle	cellular_component	0.47355	1	1	128	108	20361	780443
GO:0001883	purine nucleoside binding	molecular_function	0.47537	1	13	128	2009	20361	7.80508e+113
GO:0032549	ribonucleoside binding	molecular_function	0.47537	1	13	128	2009	20361	1.00191e+113
GO:0032550	purine ribonucleoside binding	molecular_function	0.47537	1	13	128	2009	20361	1.01123e+113
GO:0071702	organic substance transport	biological_process	0.47655	1	7	128	1093	20361	1.01123e+59
GO:0015672	monovalent inorganic cation transport	biological_process	0.47688	1	3	128	430	20361	1.01113e+26
GO:0031988	membrane-bounded vesicle	cellular_component	0.47721	1	1	128	109	20361	780443
GO:0032555	purine ribonucleotide binding	molecular_function	0.47804	1	13	128	2013	20361	1.01123e+113
GO:0015031	protein transport	biological_process	0.47855	1	5	128	758	20361	1.01123e+41
GO:0000910	cytokinesis	biological_process	0.48186	1	1	128	113	20361	101112734
GO:0008855	exodeoxyribonuclease VII activity	molecular_function	0.483	1	1	128	110	20361	101114398
GO:0045184	establishment of protein localization	biological_process	0.48306	1	5	128	762	20361	1.01123e+41
GO:0001882	nucleoside binding	molecular_function	0.48363	1	13	128	2020	20361	1.01103e+113
GO:0036094	small molecule binding	molecular_function	0.4846	1	15	128	2343	20361	1.01103e+128
GO:0044257	cellular protein catabolic process	biological_process	0.4861	1	1	128	119	20361	101110286
GO:0051603	proteolysis involved in cellular protein catabolic process	biological_process	0.4861	1	1	128	119	20361	101110286
GO:0015849	organic acid transport	biological_process	0.48632	1	1	128	115	20361	101105242
GO:0046942	carboxylic acid transport	biological_process	0.48632	1	1	128	115	20361	101105242
GO:0005819	spindle	cellular_component	0.49054	1	1	128	114	20361	101112734
GO:0004529	exodeoxyribonuclease activity	molecular_function	0.49137	1	1	128	113	20361	101114398
GO:0016895	exodeoxyribonuclease activity, producing 5'-phosphomonoesters	molecular_function	0.49137	1	1	128	113	20361	101114398
GO:0001775	cell activation	biological_process	0.49232	1	1	128	118	20361	101114398
GO:0010876	lipid localization	biological_process	0.4924	1	1	128	119	20361	101114398
GO:0016746	transferase activity, transferring acyl groups	molecular_function	0.4928	1	2	128	274	20361	1.0111e+17
GO:0015711	organic anion transport	biological_process	0.49342	1	1	128	117	20361	101105242
GO:0042995	cell projection	cellular_component	0.49555	1	1	128	116	20361	101107444
GO:0016887	ATPase activity	molecular_function	0.49582	1	3	128	432	20361	1.00146e+23
GO:0006955	immune response	biological_process	0.49668	1	2	128	322	20361	1.01106e+17
GO:0017076	purine nucleotide binding	molecular_function	0.49846	1	13	128	2043	20361	1.01114e+113
GO:0015081	sodium ion transmembrane transporter activity	molecular_function	0.49954	1	1	128	110	20361	101113062
GO:0004540	ribonuclease activity	molecular_function	0.49987	1	1	128	122	20361	101112185
GO:0000152	nuclear ubiquitin ligase complex	cellular_component	0.50012	1	1	128	116	20361	101107333
GO:0005680	anaphase-promoting complex	cellular_component	0.50012	1	1	128	116	20361	101107333
GO:0031461	cullin-RING ubiquitin ligase complex	cellular_component	0.50012	1	1	128	116	20361	101107333
GO:0008289	lipid binding	molecular_function	0.50623	1	2	128	279	20361	1.01114e+17
GO:0000151	ubiquitin ligase complex	cellular_component	0.50705	1	1	128	118	20361	101107333
GO:0005524	ATP binding	molecular_function	0.50862	1	11	128	1695	20361	1.00146e+95
GO:0042451	purine nucleoside biosynthetic process	biological_process	0.51092	1	1	128	125	20361	101114570
GO:0046129	purine ribonucleoside biosynthetic process	biological_process	0.51092	1	1	128	125	20361	101114570
GO:0005267	potassium channel activity	molecular_function	0.51106	1	1	128	118	20361	101110067
GO:0032559	adenyl ribonucleotide binding	molecular_function	0.5111	1	11	128	1698	20361	7.80508e+95
GO:0048856	anatomical structure development	biological_process	0.51448	1	2	128	297	20361	1.01115e+17
GO:0005737	cytoplasm	cellular_component	0.51772	1	15	128	2679	20361	1.0111e+131
GO:1901565	organonitrogen compound catabolic process	biological_process	0.51787	1	1	128	119	20361	101111928
GO:0030674	protein binding, bridging	molecular_function	0.51824	1	1	128	124	20361	101114398
GO:0060090	binding, bridging	molecular_function	0.51824	1	1	128	124	20361	101114398
GO:0004812	aminoacyl-tRNA ligase activity	molecular_function	0.51926	1	1	128	75	20361	101123073
GO:0031981	nuclear lumen	cellular_component	0.51948	1	3	128	470	20361	1.0111e+26
GO:0051259	protein oligomerization	biological_process	0.52211	1	1	128	125	20361	101123485
GO:0030312	external encapsulating structure	cellular_component	0.52222	1	1	128	126	20361	101104991
GO:0006418	tRNA aminoacylation for protein translation	biological_process	0.52291	1	1	128	76	20361	101123073
GO:0048609	multicellular organismal reproductive process	biological_process	0.52329	1	1	128	127	20361	101104991
GO:0044249	cellular biosynthetic process	biological_process	0.52536	1	25	128	4365	20361	1.01105e+221
GO:0042626	ATPase activity, coupled to transmembrane movement of substances	molecular_function	0.52637	1	1	128	121	20361	101103060
GO:0043492	ATPase activity, coupled to movement of substances	molecular_function	0.52637	1	1	128	121	20361	101103060
GO:0050662	coenzyme binding	molecular_function	0.52901	1	2	128	289	20361	101112792443077
GO:0070838	divalent metal ion transport	biological_process	0.53057	1	1	128	128	20361	101103782
GO:0043623	cellular protein complex assembly	biological_process	0.53079	1	2	128	305	20361	1.01115e+17
GO:0030554	adenyl nucleotide binding	molecular_function	0.53194	1	11	128	1727	20361	1.00535e+95
GO:0033043	regulation of organelle organization	biological_process	0.53256	1	1	128	129	20361	101114570
GO:0007596	blood coagulation	biological_process	0.535	1	1	128	130	20361	101114398
GO:0009144	purine nucleoside triphosphate metabolic process	biological_process	0.53514	1	1	128	132	20361	101114570
GO:0009199	ribonucleoside triphosphate metabolic process	biological_process	0.53514	1	1	128	132	20361	101114570
GO:0009205	purine ribonucleoside triphosphate metabolic process	biological_process	0.53514	1	1	128	132	20361	101114570
GO:0051082	unfolded protein binding	molecular_function	0.53569	1	1	128	136	20361	101108969
GO:0032403	protein complex binding	molecular_function	0.5378	1	1	128	141	20361	101114570
GO:0009163	nucleoside biosynthetic process	biological_process	0.53987	1	1	128	134	20361	101114570
GO:0042455	ribonucleoside biosynthetic process	biological_process	0.53987	1	1	128	134	20361	101114570
GO:1901659	glycosyl compound biosynthetic process	biological_process	0.54143	1	1	128	135	20361	101114570
GO:0005623	cell	cellular_component	0.54382	1	33	128	5839	20361	101115641,101113749,101107444,101111915,101112356,101114641,101114652,101107357,101110402,101106288,101114398,101113632,101103782,101123226,101107766,101114146,101104991,101113018,101112734,780443,101109809,101112606,101119368,101105290,101123169,101107333,100125626,101113369,101113893,100534656,101112185,101112792,101111928
GO:0044464	cell part	cellular_component	0.54382	1	33	128	5839	20361	101113893,100534656,101112185,101112792,101111928,101112734,780443,101113018,101112606,101109809,101123169,101119368,101105290,101113369,101107333,100125626,101113632,101114398,101107766,101103782,101123226,101104991,101114146,101115641,101113749,101107444,101111915,101112356,101114652,101114641,101106288,101107357,101110402
GO:0032504	multicellular organism reproduction	biological_process	0.54711	1	1	128	137	20361	101104991
GO:0034645	cellular macromolecule biosynthetic process	biological_process	0.54731	1	21	128	3755	20361	1.0111e+188
GO:0015399	primary active transmembrane transporter activity	molecular_function	0.54893	1	1	128	129	20361	101103060
GO:0015405	P-P-bond-hydrolysis-driven transmembrane transporter activity	molecular_function	0.54893	1	1	128	129	20361	101103060
GO:0016791	phosphatase activity	molecular_function	0.54921	1	2	128	295	20361	1.01123e+17
GO:0016875	ligase activity, forming carbon-oxygen bonds	molecular_function	0.54976	1	1	128	87	20361	101123073
GO:0016876	ligase activity, forming aminoacyl-tRNA and related compounds	molecular_function	0.54976	1	1	128	87	20361	101123073
GO:0016616	oxidoreductase activity, acting on the CH-OH group of donors, NAD or NADP as acceptor	molecular_function	0.55046	1	1	128	130	20361	101112792
GO:0015079	potassium ion transmembrane transporter activity	molecular_function	0.55142	1	1	128	132	20361	101110067
GO:0044702	single organism reproductive process	biological_process	0.55167	1	1	128	138	20361	101104991
GO:0031329	regulation of cellular catabolic process	biological_process	0.55329	1	1	128	130	20361	101111928
GO:0006813	potassium ion transport	biological_process	0.55338	1	1	128	132	20361	101110067
GO:0033643	host cell part	cellular_component	0.55341	1	1	128	135	20361	100125626
GO:0001076	RNA polymerase II transcription factor binding transcription factor activity	molecular_function	0.55472	1	1	128	135	20361	101110402
GO:0001104	RNA polymerase II transcription cofactor activity	molecular_function	0.55472	1	1	128	135	20361	101110402
GO:0043233	organelle lumen	cellular_component	0.55484	1	3	128	497	20361	1.01112e+26
GO:0070013	intracellular organelle lumen	cellular_component	0.55484	1	3	128	497	20361	1.01114e+26
GO:0000278	mitotic cell cycle	biological_process	0.5553	1	1	128	142	20361	101112734
GO:0009141	nucleoside triphosphate metabolic process	biological_process	0.55599	1	1	128	142	20361	101114570
GO:0002376	immune system process	biological_process	0.55793	1	2	128	357	20361	1.01106e+17
GO:0016592	mediator complex	cellular_component	0.55968	1	1	128	137	20361	101110402
GO:0070647	protein modification by small protein conjugation or removal	biological_process	0.5602	1	1	128	132	20361	101114398
GO:0008238	exopeptidase activity	molecular_function	0.56124	1	1	128	130	20361	101102739
GO:0009894	regulation of catabolic process	biological_process	0.56135	1	1	128	133	20361	101111928
GO:0031974	membrane-enclosed lumen	cellular_component	0.56274	1	3	128	504	20361	1.01114e+26
GO:0018995	host	cellular_component	0.56296	1	1	128	139	20361	100125626
GO:0043245	extraorganismal space	cellular_component	0.56296	1	1	128	139	20361	100125626
GO:0043657	host cell	cellular_component	0.56296	1	1	128	139	20361	100125626
GO:0044215	other organism	cellular_component	0.56296	1	1	128	139	20361	100125626
GO:0044216	other organism cell	cellular_component	0.56296	1	1	128	139	20361	100125626
GO:0044217	other organism part	cellular_component	0.56296	1	1	128	139	20361	100125626
GO:0019953	sexual reproduction	biological_process	0.56318	1	1	128	143	20361	101104991
GO:0043038	amino acid activation	biological_process	0.56398	1	1	128	92	20361	101123073
GO:0043039	tRNA aminoacylation	biological_process	0.56398	1	1	128	92	20361	101123073
GO:0031410	cytoplasmic vesicle	cellular_component	0.56677	1	1	128	142	20361	780443
GO:0044428	nuclear part	cellular_component	0.56832	1	4	128	677	20361	1.01114e+35
GO:0031982	vesicle	cellular_component	0.56978	1	1	128	143	20361	780443
GO:0009059	macromolecule biosynthetic process	biological_process	0.56981	1	21	128	3795	20361	1.01113e+188
GO:0090304	nucleic acid metabolic process	biological_process	0.57035	1	22	128	3796	20361	1.01114e+197
GO:0051301	cell division	biological_process	0.57337	1	1	128	145	20361	101112734
GO:0072511	divalent inorganic cation transport	biological_process	0.57463	1	1	128	143	20361	101103782
GO:0044444	cytoplasmic part	cellular_component	0.57698	1	11	128	2124	20361	1.01112e+95
GO:0008233	peptidase activity	molecular_function	0.58276	1	6	128	1044	20361	1.01123e+50
GO:0007049	cell cycle	biological_process	0.58458	1	3	128	523	20361	1.01112e+26
GO:0034220	ion transmembrane transport	biological_process	0.58695	1	2	128	336	20361	1.01115e+17
GO:0030001	metal ion transport	biological_process	0.58713	1	3	128	504	20361	1.01113e+26
GO:0008092	cytoskeletal protein binding	molecular_function	0.58743	1	3	128	502	20361	4.43004e+23
GO:0043565	sequence-specific DNA binding	molecular_function	0.58798	1	3	128	520	20361	1.00535e+26
GO:0022402	cell cycle process	biological_process	0.58981	1	2	128	339	20361	1.01113e+17
GO:0009152	purine ribonucleotide biosynthetic process	biological_process	0.59144	1	1	128	152	20361	101114570
GO:0007599	hemostasis	biological_process	0.59156	1	1	128	153	20361	101114398
GO:0050817	coagulation	biological_process	0.59156	1	1	128	153	20361	101114398
GO:0050878	regulation of body fluid levels	biological_process	0.59156	1	1	128	153	20361	101114398
GO:0016614	oxidoreductase activity, acting on CH-OH group of donors	molecular_function	0.59287	1	1	128	145	20361	101112792
GO:0003824	catalytic activity	molecular_function	0.5939	1	45	128	7631	20361	101123429,101110286,101123195,101123226,443077,443125,101115129,101114398,101122993,101103060,101114652,101102739,101107579,101110402,101113807,101123073,443344,101122969,101112720,101115641,101108969,101107703,101103314,101110067,100534656,101109363,101107846,101111928,101112792,101112185,101113325,101103668,101118138,101106352,101122739,101119368,101112972,101113336,101114008,100145880,10019097…
GO:0090407	organophosphate biosynthetic process	biological_process	0.59741	1	2	128	336	20361	1.01108e+17
GO:0009260	ribonucleotide biosynthetic process	biological_process	0.60004	1	1	128	155	20361	101114570
GO:0046390	ribose phosphate biosynthetic process	biological_process	0.60004	1	1	128	155	20361	101114570
GO:0016021	integral to membrane	cellular_component	0.60265	1	21	128	4128	20361	1.01112e+185
GO:0030117	membrane coat	cellular_component	0.60583	1	1	128	149	20361	780443
GO:0048475	coated membrane	cellular_component	0.60583	1	1	128	149	20361	780443
GO:0006164	purine nucleotide biosynthetic process	biological_process	0.60703	1	1	128	159	20361	101114570
GO:0042278	purine nucleoside metabolic process	biological_process	0.60834	1	1	128	160	20361	101114570
GO:0046128	purine ribonucleoside metabolic process	biological_process	0.60834	1	1	128	160	20361	101114570
GO:0007154	cell communication	biological_process	0.60836	1	18	128	3632	20361	1.01108e+158
GO:0015077	monovalent inorganic cation transmembrane transporter activity	molecular_function	0.60882	1	3	128	527	20361	1.0111e+26
GO:0019752	carboxylic acid metabolic process	biological_process	0.60926	1	3	128	446	20361	1.01123e+26
GO:0015276	ligand-gated ion channel activity	molecular_function	0.60949	1	1	128	154	20361	101113305
GO:0022834	ligand-gated channel activity	molecular_function	0.60949	1	1	128	154	20361	101113305
GO:0044710	single-organism metabolic process	biological_process	0.61141	1	14	128	2382	20361	1.0111e+119
GO:0004536	deoxyribonuclease activity	molecular_function	0.61198	1	1	128	155	20361	101114398
GO:0043170	macromolecule metabolic process	biological_process	0.61293	1	37	128	6637	20361	101112356,101107579,101102739,101106288,101110402,101123073,100302545,101108969,101113749,101112720,101111915,101123429,105615177,101123226,101110286,101109727,101114146,101113632,101114398,443125,101122993,101122739,101119368,101112972,101105290,101113369,100190973,100125626,101113336,101113018,101112606,100534656,101109363,101112185,101112792,105605576,101113893
GO:0031224	intrinsic to membrane	cellular_component	0.61343	1	21	128	4149	20361	1.01115e+185
GO:0043168	anion binding	molecular_function	0.61559	1	14	128	2371	20361	1.01103e+119
GO:0043228	non-membrane-bounded organelle	cellular_component	0.62012	1	8	128	1654	20361	1.01114e+71
GO:0043232	intracellular non-membrane-bounded organelle	cellular_component	0.62012	1	8	128	1654	20361	1.01114e+71
GO:0072522	purine-containing compound biosynthetic process	biological_process	0.62413	1	1	128	167	20361	101114570
GO:0009058	biosynthetic process	biological_process	0.62577	1	25	128	4556	20361	1.01113e+221
GO:0009055	electron carrier activity	molecular_function	0.62679	1	1	128	181	20361	101113325
GO:0042060	wound healing	biological_process	0.62708	1	1	128	170	20361	101114398
GO:0016070	RNA metabolic process	biological_process	0.62718	1	17	128	3020	20361	1.05615e+152
GO:0043436	oxoacid metabolic process	biological_process	0.6315	1	3	128	463	20361	1.01102e+26
GO:0006357	regulation of transcription from RNA polymerase II promoter	biological_process	0.63187	1	1	128	169	20361	101110402
GO:0009119	ribonucleoside metabolic process	biological_process	0.63379	1	1	128	170	20361	101114570
GO:0006082	organic acid metabolic process	biological_process	0.63975	1	3	128	470	20361	1.01102e+26
GO:0005882	intermediate filament	cellular_component	0.643	1	1	128	193	20361	101107766
GO:0045111	intermediate filament cytoskeleton	cellular_component	0.643	1	1	128	193	20361	101107766
GO:0016651	oxidoreductase activity, acting on NAD(P)H	molecular_function	0.64488	1	1	128	174	20361	101118138
GO:0048037	cofactor binding	molecular_function	0.65207	1	2	128	363	20361	443077101112792
GO:0032502	developmental process	biological_process	0.65368	1	3	128	579	20361	1.01105e+26
GO:1901576	organic substance biosynthetic process	biological_process	0.65574	1	24	128	4447	20361	1.01113e+215
GO:1901605	alpha-amino acid metabolic process	biological_process	0.65868	1	1	128	156	20361	101102489
GO:0008652	cellular amino acid biosynthetic process	biological_process	0.65914	1	1	128	153	20361	101123429
GO:0004175	endopeptidase activity	molecular_function	0.66175	1	4	128	775	20361	1.01123e+32
GO:0022414	reproductive process	biological_process	0.66229	1	1	128	184	20361	101104991
GO:0071705	nitrogen compound transport	biological_process	0.66566	1	1	128	183	20361	101105242
GO:0007165	signal transduction	biological_process	0.66819	1	17	128	3563	20361	1.00146e+149
GO:0009611	response to wounding	biological_process	0.67257	1	1	128	193	20361	101114398
GO:0009150	purine ribonucleotide metabolic process	biological_process	0.67522	1	1	128	188	20361	101114570
GO:0042592	homeostatic process	biological_process	0.67767	1	1	128	205	20361	101115641
GO:0044700	single organism signaling	biological_process	0.67982	1	17	128	3585	20361	1.00535e+149
GO:0009259	ribonucleotide metabolic process	biological_process	0.68206	1	1	128	191	20361	101114570
GO:0019693	ribose phosphate metabolic process	biological_process	0.68206	1	1	128	191	20361	101114570
GO:0006812	cation transport	biological_process	0.68286	1	4	128	773	20361	1.01115e+35
GO:0023052	signaling	biological_process	0.68345	1	17	128	3591	20361	1.01113e+149
GO:0016772	transferase activity, transferring phosphorus-containing groups	molecular_function	0.68503	1	9	128	1663	20361	1.01123e+80
GO:0070011	peptidase activity, acting on L-amino acid peptides	molecular_function	0.68615	1	5	128	977	20361	1.01113e+41
GO:0042578	phosphoric ester hydrolase activity	molecular_function	0.68869	1	2	128	377	20361	1.01123e+17
GO:0000989	transcription factor binding transcription factor activity	molecular_function	0.68921	1	1	128	195	20361	101110402
GO:0003712	transcription cofactor activity	molecular_function	0.68921	1	1	128	195	20361	101110402
GO:0016740	transferase activity	molecular_function	0.68946	1	15	128	2738	20361	1.01114e+134
GO:0019867	outer membrane	cellular_component	0.69274	1	1	128	201	20361	101114652
GO:0044403	symbiosis, encompassing mutualism through parasitism	biological_process	0.69595	1	3	128	611	20361	1.01116e+26
GO:0044423	virion part	cellular_component	0.6969	1	3	128	617	20361	1.01113e+23
GO:0006818	hydrogen transport	biological_process	0.70035	1	1	128	206	20361	101114570
GO:0015992	proton transport	biological_process	0.70035	1	1	128	206	20361	101114570
GO:0044419	interspecies interaction between organisms	biological_process	0.70095	1	3	128	615	20361	1.01116e+26
GO:0044764	multi-organism cellular process	biological_process	0.70223	1	3	128	620	20361	1.01113e+26
GO:0042623	ATPase activity, coupled	molecular_function	0.70288	1	1	128	199	20361	101103060
GO:0015630	microtubule cytoskeleton	cellular_component	0.70895	1	1	128	204	20361	101112734
GO:0065008	regulation of biological quality	biological_process	0.70957	1	3	128	631	20361	1.01114e+26
GO:0005506	iron ion binding	molecular_function	0.71678	1	1	128	224	20361	101102489
GO:0016071	mRNA metabolic process	biological_process	0.72271	1	1	128	214	20361	101112185
GO:0019538	protein metabolic process	biological_process	0.72404	1	17	128	3359	20361	4.43125e+149
GO:0044267	cellular protein metabolic process	biological_process	0.72503	1	13	128	2633	20361	1.00191e+116
GO:0006091	generation of precursor metabolites and energy	biological_process	0.7297	1	1	128	222	20361	101118138
GO:0000003	reproduction	biological_process	0.73793	1	2	128	453	20361	1.01113e+17
GO:0008610	lipid biosynthetic process	biological_process	0.73839	1	1	128	223	20361	101112792
GO:0019012	virion	cellular_component	0.74334	1	3	128	663	20361	1.01113e+23
GO:0016053	organic acid biosynthetic process	biological_process	0.74355	1	1	128	201	20361	101123429
GO:0046394	carboxylic acid biosynthetic process	biological_process	0.74355	1	1	128	201	20361	101123429
GO:0016705	oxidoreductase activity, acting on paired donors, with incorporation or reduction of molecular oxygen	molecular_function	0.74523	1	1	128	217	20361	443077
GO:0000988	protein binding transcription factor activity	molecular_function	0.74993	1	1	128	230	20361	101110402
GO:0031966	mitochondrial membrane	cellular_component	0.75551	1	1	128	251	20361	101114652
GO:0044430	cytoskeletal part	cellular_component	0.75816	1	2	128	469	20361	1.01113e+17
GO:0032501	multicellular organismal process	biological_process	0.76113	1	4	128	907	20361	1.01105e+32
GO:0033365	protein localization to organelle	biological_process	0.77436	1	1	128	253	20361	101111928
GO:0006605	protein targeting	biological_process	0.77751	1	1	128	255	20361	101123312
GO:0022804	active transmembrane transporter activity	molecular_function	0.77807	1	1	128	241	20361	101103060
GO:0043167	ion binding	molecular_function	0.7828	1	30	128	5471	20361	101103060,101122993,101114398,494431,443077,101104991,101112185,101109363,101103918,101123195,101107766,100534656,101108437,101112321,101107703,101105140,101113584,101112720,101108969,100302545,101123073,780508,100190973,101102489,100145880,101103569,101123312,101102739,101119786,101122739
GO:0048610	cellular process involved in reproduction	biological_process	0.78517	1	1	128	265	20361	101104991
GO:0006366	transcription from RNA polymerase II promoter	biological_process	0.78873	1	1	128	262	20361	101110402
GO:0005740	mitochondrial envelope	cellular_component	0.78876	1	1	128	280	20361	101114652
GO:0016817	hydrolase activity, acting on acid anhydrides	molecular_function	0.79233	1	5	128	1097	20361	1.01103e+41
GO:0017111	nucleoside-triphosphatase activity	molecular_function	0.80342	1	4	128	918	20361	1.01103e+32
GO:0005856	cytoskeleton	cellular_component	0.80415	1	2	128	517	20361	1.01108e+17
GO:0042221	response to chemical stimulus	biological_process	0.80431	1	1	128	261	20361	100534656
GO:0005179	hormone activity	molecular_function	0.80562	1	1	128	245	20361	493773
GO:0051716	cellular response to stimulus	biological_process	0.80588	1	18	128	4042	20361	1.00146e+158
GO:0006629	lipid metabolic process	biological_process	0.80801	1	2	128	499	20361	1.01118e+17
GO:0022890	inorganic cation transmembrane transporter activity	molecular_function	0.81212	1	3	128	733	20361	1.0111e+26
GO:0008270	zinc ion binding	molecular_function	0.8122	1	8	128	1672	20361	1.01123e+68
GO:0016462	pyrophosphatase activity	molecular_function	0.81435	1	4	128	934	20361	1.00146e+32
GO:0046873	metal ion transmembrane transporter activity	molecular_function	0.81577	1	2	128	514	20361	1.0111e+17
GO:0044429	mitochondrial part	cellular_component	0.81621	1	1	128	305	20361	101114652
GO:0044283	small molecule biosynthetic process	biological_process	0.81728	1	1	128	256	20361	101123429
GO:0044425	membrane part	cellular_component	0.81986	1	22	128	4795	20361	1.01115e+191
GO:0044707	single-multicellular organism process	biological_process	0.82009	1	3	128	776	20361	4.43058e+23
GO:0080090	regulation of primary metabolic process	biological_process	0.82023	1	10	128	2135	20361	1.05606e+89
GO:0010467	gene expression	biological_process	0.82029	1	18	128	3802	20361	1.01105e+161
GO:0015078	hydrogen ion transmembrane transporter activity	molecular_function	0.82408	1	1	128	297	20361	101114570
GO:0003723	RNA binding	molecular_function	0.82454	1	3	128	782	20361	1.01123e+26
GO:0031967	organelle envelope	cellular_component	0.82899	1	1	128	313	20361	101114652
GO:0005102	receptor binding	molecular_function	0.83113	1	3	128	759	20361	4.93773e+23
GO:0006399	tRNA metabolic process	biological_process	0.83178	1	1	128	249	20361	101123073
GO:0044711	single-organism biosynthetic process	biological_process	0.83199	1	1	128	270	20361	101123429
GO:0032991	macromolecular complex	cellular_component	0.84022	1	13	128	2979	20361	1.01106e+113
GO:0050789	regulation of biological process	biological_process	0.84213	1	28	128	5952	20361	100302545,101113584,101107703,101112321,101109809,101122766,101105242,101119368,101107579,101102247,101106613,101106288,100145880,101110402,101114570,443330,101114398,101104174,105615177,100534656,101123429,101103782,101123226,101109727,101111928,101112792,105605576,101115374
GO:0016482	cytoplasmic transport	biological_process	0.84228	1	1	128	316	20361	101114570
GO:0016032	viral process	biological_process	0.84493	1	2	128	567	20361	1.01113e+17
GO:0006259	DNA metabolic process	biological_process	0.84729	1	5	128	1226	20361	1.01114e+44
GO:0016818	hydrolase activity, acting on acid anhydrides, in phosphorus-containing anhydrides	molecular_function	0.84812	1	4	128	989	20361	1.00146e+32
GO:0046872	metal ion binding	molecular_function	0.85026	1	17	128	3438	20361	1.01108e+149
GO:0031323	regulation of cellular metabolic process	biological_process	0.85137	1	10	128	2209	20361	1.05615e+89
GO:0050794	regulation of cellular process	biological_process	0.85195	1	27	128	5809	20361	101106288,101110402,100145880,101105242,101122766,101102247,101107579,101106613,101119368,101112321,101107703,101109809,101113584,100302545,101112792,101111928,101115374,105605576,105615177,101123429,100534656,101109727,101123226,101104174,101114570,101114398,443330
GO:0031975	envelope	cellular_component	0.85338	1	1	128	338	20361	101114652
GO:0065007	biological regulation	biological_process	0.85525	1	29	128	6189	20361	101122766,101105242,101119368,101107579,101102247,101106613,101106288,100145880,101110402,100302545,101115641,101113584,101107703,101112321,101109809,100534656,105615177,101123429,101103782,101123226,101109727,101111928,101112792,101115374,105605576,101114570,443330,101114398,101104174
GO:0033554	cellular response to stress	biological_process	0.85549	1	2	128	581	20361	1.0111e+17
GO:0043169	cation binding	molecular_function	0.8563	1	17	128	3456	20361	1.01108e+149
GO:0001071	nucleic acid binding transcription factor activity	molecular_function	0.85773	1	3	128	804	20361	1.01113e+26
GO:0003700	sequence-specific DNA binding transcription factor activity	molecular_function	0.85773	1	3	128	804	20361	1.00535e+26
GO:0071944	cell periphery	cellular_component	0.86221	1	2	128	587	20361	1.01105e+17
GO:0005198	structural molecule activity	molecular_function	0.86469	1	5	128	1453	20361	7.80443e+41
GO:0019219	regulation of nucleobase-containing compound metabolic process	biological_process	0.87301	1	9	128	2073	20361	1.05606e+80
GO:0051171	regulation of nitrogen compound metabolic process	biological_process	0.87301	1	9	128	2073	20361	1.01123e+80
GO:0046914	transition metal ion binding	molecular_function	0.87761	1	9	128	2042	20361	1.01103e+77
GO:0006412	translation	biological_process	0.87798	1	3	128	1001	20361	1.00126e+26
GO:0019222	regulation of metabolic process	biological_process	0.88346	1	10	128	2300	20361	1.05606e+89
GO:0060255	regulation of macromolecule metabolic process	biological_process	0.8892	1	9	128	2125	20361	1.01113e+80
GO:0008324	cation transmembrane transporter activity	molecular_function	0.8906	1	3	128	863	20361	1.0111e+26
GO:0055114	oxidation-reduction process	biological_process	0.89283	1	5	128	1273	20361	1.01102e+41
GO:0034660	ncRNA metabolic process	biological_process	0.89516	1	1	128	331	20361	101123073
GO:0006355	regulation of transcription, DNA-dependent	biological_process	0.91778	1	8	128	2018	20361	1.01119e+71
GO:0043234	protein complex	cellular_component	0.91828	1	8	128	2052	20361	1.01114e+68
GO:2001141	regulation of RNA biosynthetic process	biological_process	0.9187	1	8	128	2022	20361	1.01119e+71
GO:0051252	regulation of RNA metabolic process	biological_process	0.91931	1	8	128	2025	20361	1.01113e+71
GO:0016491	oxidoreductase activity	molecular_function	0.92641	1	5	128	1379	20361	4.43077e+41
GO:2000112	regulation of cellular macromolecule biosynthetic process	biological_process	0.92763	1	8	128	2061	20361	1.0111e+71
GO:0010556	regulation of macromolecule biosynthetic process	biological_process	0.92845	1	8	128	2065	20361	1.01123e+71
GO:0031326	regulation of cellular biosynthetic process	biological_process	0.92845	1	8	128	2065	20361	1.05615e+71
GO:0009889	regulation of biosynthetic process	biological_process	0.92862	1	8	128	2066	20361	1.01123e+71
GO:0006260	DNA replication	biological_process	0.93102	1	1	128	447	20361	101113749
GO:0010468	regulation of gene expression	biological_process	0.93122	1	8	128	2079	20361	1.01123e+71
GO:0003674	molecular_function	molecular_function	0.95357	1	96	128	17899	20361	101105290,101112972,101113488,101122739,100145880,101113369,101113305,101113018,780508,780443,101113108,101109809,101112606,101109363,101107846,100534656,101103420,105605576,443004,101102247,101107579,101119786,101106613,101105242,101122766,101110402,101108969,443344,101111082,101103314,101112856,101109727,101110286,101103918,101123429,493773,101115129,101114398,101123511,443330,101114570,443077,…
GO:0050896	response to stimulus	biological_process	0.95561	1	19	128	4900	20361	1.01114e+167
GO:0006950	response to stress	biological_process	0.96966	1	3	128	1179	20361	1.01114e+26
GO:0005488	binding	molecular_function	0.97061	1	61	128	11924	20361	101113108,780508,101104839,101112606,101109809,101122739,101111669,101119368,101105290,101123312,101103569,101113369,101102489,100190973,100145880,101118138,443004,101113893,100534656,101107846,101109363,101112185,101112792,105605576,101103420,101123073,100302545,101108969,101112720,101113584,101107703,101105140,101111915,101112856,101112321,101110067,101103560,101108437,101112356,101102739,10110…
GO:0007166	cell surface receptor signaling pathway	biological_process	0.97676	1	5	128	2211	20361	4.4333e+41
GO:0003735	structural constituent of ribosome	molecular_function	0.97721	1	1	128	831	20361	100125626
GO:0005840	ribosome	cellular_component	0.97865	1	1	128	840	20361	100125626
GO:0007186	G-protein coupled receptor signaling pathway	biological_process	0.98002	1	4	128	2007	20361	4.4333e+32
GO:0004930	G-protein coupled receptor activity	molecular_function	0.98419	1	3	128	1789	20361	1.01123e+23
GO:0030529	ribonucleoprotein complex	cellular_component	0.99035	1	1	128	972	20361	100125626
GO:0004871	signal transducer activity	molecular_function	0.99231	1	4	128	2206	20361	1.01113e+32
GO:0060089	molecular transducer activity	molecular_function	0.99231	1	4	128	2206	20361	4.4333e+32
GO:0004888	transmembrane signaling receptor activity	molecular_function	0.99298	1	3	128	1947	20361	1.01123e+23
GO:0038023	signaling receptor activity	molecular_function	0.99466	1	3	128	2000	20361	1.01104e+23
GO:0005515	protein binding	molecular_function	0.99658	1	24	128	6046	20361	1.01123e+209
GO:0004872	receptor activity	molecular_function	0.9967	1	3	128	2090	20361	1.01104e+23

## Sheet: MF vs ML lncRNA trans
gene list: trans-target genes of DE lncRNAs identified in MF vs. ML
GO_accession	Description	Term_type	Over_represented_pValue	Corrected_pValue	CAD_item	CAD_list	Bg_item	Bg_list	Gene_names
GO:0050789	regulation of biological process	biological_process	6.5361e-05	0.15722	231	702	5952	20361	101110030,100169935,101117609,101105642,101103746,101109946,101118816,101109713,101118032,443189,100147707,101102681,101120749,101123644,101122496,101107985,101110972,101112083,101106329,101107691,101103126,101107476,101118500,100170317,101109979,101119694,101107196,101115361,100135699,101108973,100820740,101114027,101119515,101107891,101114883,101102897,101121309,100135687,101120630,101113586,10…
GO:0050794	regulation of cellular process	biological_process	7.169e-05	0.15722	225	702	5809	20361	101108256,101116194,101104131,101114918,101112579,101109515,101108667,101122281,101119564,100642179,101113223,101122913,101107789,101110298,101109099,101118166,101121620,101109245,101114282,101112233,101116328,101111845,101104135,101102074,554257,105605100,101119298,101115254,101103795,101106544,101107495,101123633,101117084,101109277,101107660,101116580,101111207,101104175,101113454,101110686,10…
GO:0065007	biological regulation	biological_process	0.00010547	0.15722	238	702	6189	20361	101114883,101102897,101121309,100135687,101120630,101102729,100135699,101115361,100820740,101108973,101119515,101114027,101107891,101113240,101115623,101119602,101109781,101122265,101107275,101116876,101113586,101109328,101114912,101108320,101115611,101109946,101105642,101103746,101118816,101109713,443189,101118032,100147707,101102681,101110030,101120031,101117609,100169935,101106329,101107691,10…
GO:0005576	extracellular region	cellular_component	0.00028061	0.28497	82	702	1623	20361	101111828,101107324,101121788,101102729,101121916,101121914,101113767,101108973,101115785,101115490,101115211,101112056,101104244,101120756,101113806,101102623,101101882,101116876,101120495,101113693,101123469,101111919,101122523,105612572,101113586,106991784,101114682,101105473,101108320,101110470,101114730,101123195,443189,101113126,101106812,101120031,101119694,101118500,101107127,101109289,10…
GO:0005575	cellular_component	cellular_component	0.00031862	0.28497	421	702	11755	20361	101113357,101104867,101115539,101102401,101107425,101103292,101105030,101109737,101104227,101112662,101106824,101111545,101123485,101123125,101111507,443053,101102133,101106703,101108844,101118356,101105756,101115229,101102920,101108200,101106623,100037702,101108762,443056,101123350,101106631,101104943,101104056,101106538,101110060,101102395,101105693,105606632,101110673,101112093,101122358,10111…
GO:0080090	regulation of primary metabolic process	biological_process	0.00071027	0.3617	104	702	2135	20361	100125358,101113261,101116062,101102402,101111609,101103292,443513,105615177,101108670,101117299,101119170,101104486,101112046,101117084,105602103,101107495,101106341,101104902,101110686,101122961,101117436,101106824,101111545,101123350,101121620,101122806,101106986,101103984,101104304,101103795,443262,101119298,101115254,105605100,101102074,101108317,101111845,101116328,101104131,101120429,10110…
GO:0019219	regulation of nucleobase-containing compound metabolic process	biological_process	0.00079825	0.3617	101	702	2073	20361	101108256,101116194,101115197,101104131,101105452,101120429,101108012,101122358,101104647,101113223,100642179,101104380,101122913,101109515,101116201,101123350,101103984,101121620,101122806,101106986,443262,101115254,101119298,101104304,101103795,101108317,101111845,101116328,105605100,101102074,105602103,101112046,101117084,101107495,101104902,101110686,101122961,101117436,101111545,101106824,10…
GO:0051171	regulation of nitrogen compound metabolic process	biological_process	0.00079825	0.3617	101	702	2073	20361	101120429,101105452,101104131,101115197,101108256,101116194,101122358,101108012,101122913,101104380,100642179,101113223,101104647,101116201,101109515,101123350,101106986,101122806,101121620,101103984,101104304,101103795,101115254,101119298,443262,101102074,105605100,101111845,101116328,101108317,101117084,101112046,105602103,101107495,101117436,101122961,101110686,101104902,101106824,101111545,10…
GO:2001141	regulation of RNA biosynthetic process	biological_process	0.0010877	0.3617	98	702	2022	20361	101114771,101109781,101122265,101115623,101108320,101115611,101109328,101113586,101104912,101113487,100135687,101123504,101104434,101110051,101114883,101107891,101110276,101121532,100820740,101112408,443412,100653388,100135699,100217409,101115490,101115361,101121782,101107196,101101895,101115273,101103126,101105239,101115163,101106329,101111386,101122496,101123644,443189,101101949,101109713,10111…
GO:0060255	regulation of macromolecule metabolic process	biological_process	0.0010931	0.3617	102	702	2125	20361	101114883,101110051,101104434,101123504,100135687,101115490,101115361,101121782,100217409,100135699,100653388,101112408,100820740,443412,101121532,101110276,101107891,101115623,101122265,101109781,101114771,101104912,101113586,101113487,101109328,101115611,101108320,101108379,101115695,101109713,101101949,443189,101117106,101111501,100169935,101117609,101112580,101114392,101118475,101106329,10111…
GO:0051252	regulation of RNA metabolic process	biological_process	0.0011172	0.3617	98	702	2025	20361	100642179,101104647,101113223,101122913,101104380,101116201,101109515,101115197,101116194,101108256,101105452,101104131,101122358,101108012,101115254,101119298,443262,101104304,101103795,101111845,101116328,101108317,101102074,105605100,101123350,101103984,101106986,101121620,101122806,101122961,101110686,101117436,101104902,101111545,101106824,105602103,101117084,101112046,101107495,101108670,10…
GO:0010556	regulation of macromolecule biosynthetic process	biological_process	0.0012824	0.3617	99	702	2065	20361	101123350,101103984,101121620,101122806,101106986,443262,101119298,101115254,101104304,101103795,101108317,101111845,101116328,105605100,101102074,101116194,101108256,101115197,101104131,101120429,101105452,101108012,101122358,101113223,101104647,100642179,101104380,101122913,101109515,101116201,101116062,101111609,101102402,100125358,443513,101103292,101108670,105615177,101104486,101119170,10560…
GO:0031326	regulation of cellular biosynthetic process	biological_process	0.0012824	0.3617	99	702	2065	20361	101122961,101117436,101110686,101104902,101111545,101106824,105602103,101117084,101112046,101107495,101108670,105615177,101104486,101119170,101102402,101116062,101111609,100125358,443513,101103292,100642179,101113223,101104647,101122913,101104380,101116201,101109515,101115197,101108256,101116194,101105452,101120429,101104131,101122358,101108012,101115254,101119298,443262,101104304,101103795,10111…
GO:0009889	regulation of biosynthetic process	biological_process	0.0012911	0.3617	99	702	2066	20361	101104902,101122961,101117436,101110686,101111545,101106824,105602103,101112046,101117084,101107495,101108670,105615177,101104486,101119170,101116062,101111609,101102402,100125358,443513,101103292,101113223,101104647,100642179,101104380,101122913,101109515,101116201,101116194,101108256,101115197,101104131,101120429,101105452,101108012,101122358,443262,101119298,101115254,101104304,101103795,10110…
GO:0006355	regulation of transcription, DNA-dependent	biological_process	0.0015186	0.3617	97	702	2018	20361	101103292,443513,100125358,101116062,101111609,101102402,101119170,101104486,105615177,101108670,101107495,101112046,101117084,105602103,101106824,101111545,101104902,101110686,101122961,101117436,101122806,101121620,101106986,101103984,101123350,105605100,101102074,101108317,101111845,101116328,101103795,101104304,443262,101119298,101108012,101122358,101104131,101105452,101116194,101108256,10111…
GO:0016020	membrane	cellular_component	0.0016029	0.3617	254	702	6737	20361	101120429,101110208,101113427,101101892,101110673,101111779,101122358,101112880,101103123,101116201,101111867,101109996,101121614,101113668,101106631,101111639,101122806,100037702,101103984,101118762,101108200,101106623,101108067,101114927,101115229,101105074,101118356,101102513,101110391,101119199,101104560,101116835,100294558,101119067,105605801,101122922,101114643,101123125,101108733,101123485…
GO:0031323	regulation of cellular metabolic process	biological_process	0.0017102	0.3617	105	702	2209	20361	100217409,100135699,100653388,101121782,101115361,101115490,100820740,101112408,443412,101121532,101110276,101107891,101110051,101104434,101114883,101123504,100135687,101104912,101113586,101113487,101109328,101108320,101115611,101115623,101109781,101122265,101114771,101111501,101117106,101112580,101117609,100169935,101118475,101114392,101108379,101109713,101115695,443189,101101949,101123644,10112…
GO:0009755	hormone-mediated signaling pathway	biological_process	0.0017276	0.3617	9	702	64	20361	1.01112e+74
GO:0032870	cellular response to hormone stimulus	biological_process	0.0017276	0.3617	9	702	64	20361	1.00653e+74
GO:0071495	cellular response to endogenous stimulus	biological_process	0.0017276	0.3617	9	702	64	20361	1.0111e+74
GO:0004888	transmembrane signaling receptor activity	molecular_function	0.0017376	0.3617	56	702	1947	20361	101112233,105616317,101109996,101110298,101109245,101111639,101108067,443273,443189,100147707,101113274,101104135,101109946,101118816,101109535,101110938,443271,101123028,101120749,101110673,101109271,100642179,101122472,443274,101112636,100170317,101111867,101107691,101101902,101114434,101111884,101119515,101104227,101105356,101104100,101114869,101104488,101102897,101115539,101119227,101121309,1…
GO:2000112	regulation of cellular macromolecule biosynthetic process	biological_process	0.0017794	0.3617	98	702	2061	20361	443189,101101949,101115695,101109713,101108379,101118475,101114392,101117609,100169935,101112580,101117106,101111501,101107196,101115273,101103126,101101895,101105239,101115163,101106329,101111386,101122496,101123644,100135687,101123504,101114883,101104434,101110051,101107891,101121532,101110276,443412,100820740,101112408,101121782,101115361,101115490,100135699,100653388,100217409,101114771,10112…
GO:0005231	excitatory extracellular ligand-gated ion channel activity	molecular_function	0.0018739	0.36436	6	702	28	20361	4.43273e+44
GO:0008942	nitrite reductase [NAD(P)H] activity	molecular_function	0.0021162	0.37774	2	702	4	20361	1.01118e+17
GO:0046857	oxidoreductase activity, acting on other nitrogenous compounds as donors, with NAD or NADP as acceptor	molecular_function	0.0021162	0.37774	2	702	4	20361	1.0017e+17
GO:0010468	regulation of gene expression	biological_process	0.0022484	0.37774	98	702	2079	20361	101108012,101122358,101108256,101116194,101115197,101104131,101105452,101109515,101116201,101104647,101113223,100642179,101104380,101122913,101103984,101121620,101122806,101106986,101123350,101108317,101111845,101116328,105605100,101102074,443262,101115254,101119298,101104304,101103795,101107495,105602103,101112046,101117084,101111545,101106824,101104902,101110686,101122961,101117436,443513,10110…
GO:0019222	regulation of metabolic process	biological_process	0.0022806	0.37774	108	702	2300	20361	101108379,101109713,101115695,101101949,443189,101102681,101117106,101111501,100169935,101117609,101112580,101118475,101114392,101106329,101115163,101105239,101115273,101103126,101101895,443274,101107196,101123644,101122496,101111386,101114883,101104434,101110051,101123504,100135687,101115361,101121782,101115490,100217409,100135699,100653388,100820740,101112408,443412,101110276,101121532,10110789…
GO:0032774	RNA biosynthetic process	biological_process	0.0024474	0.39088	110	702	2407	20361	101115695,101109713,101108379,443189,101101949,101117106,101111501,101114392,101118475,101117609,100169935,101112580,101105239,101116716,101106329,101115163,101107196,101115273,101103126,101107476,101101895,101105645,101123644,101109289,101111386,101122496,101123504,101109113,101114883,101110051,101104434,100135687,100820740,101112408,443412,101115361,101115490,101121782,100653388,100135699,10021…
GO:0071310	cellular response to organic substance	biological_process	0.0027742	0.39243	9	702	69	20361	4.43412e+74
GO:0018130	heterocycle biosynthetic process	biological_process	0.0028264	0.39243	125	702	2782	20361	101105239,101116716,101106329,101115163,101105618,101107196,100137069,101107476,101101895,101103126,101115273,101123644,101105203,101105645,101109289,101111386,101122150,101122496,101109713,101115695,101108379,101101949,443189,101111501,101117106,101118475,101114392,101112580,100169935,101117609,101121880,101103276,101109781,101122265,101115623,101114771,101104912,101113487,101113586,101108320,10…
GO:0044271	cellular nitrogen compound biosynthetic process	biological_process	0.0028314	0.39243	125	702	2780	20361	101114771,101122265,101109781,101115623,101115611,101114682,101108320,101109328,101122401,101104912,101113586,101113487,100135687,101109113,101123504,101114883,101118975,101110051,101104434,101107891,101121532,101110276,100820740,443412,101112408,101115490,101115361,101121782,100135699,101118837,100217409,100653388,100137069,101107196,101103126,101115273,101101895,101107476,101105239,101116716,10…
GO:0015276	ligand-gated ion channel activity	molecular_function	0.003002	0.39243	14	702	154	20361	4.43274e+116
GO:0022834	ligand-gated channel activity	molecular_function	0.003002	0.39243	14	702	154	20361	1.00913e+116
GO:0005234	extracellular-glutamate-gated ion channel activity	molecular_function	0.0031222	0.39243	5	702	19	20361	1.01104e+35
GO:0016070	RNA metabolic process	biological_process	0.0034521	0.39243	133	702	3020	20361	105602103,101119199,101112046,101111545,101119512,101106824,101117436,101122961,101104449,101103292,101111609,101116062,100125358,101104486,101108670,101116625,101122358,101112880,101108012,101115197,101105452,101105693,101116201,101104647,101104380,101103984,101106986,101122806,101123350,101108317,101107295,443262,101104304,101104912,101113487,101113270,101114771,101120495,100217409,100653388,10…
GO:0016661	oxidoreductase activity, acting on other nitrogenous compounds as donors	molecular_function	0.0035	0.39243	2	702	5	20361	1.0017e+17
GO:0002115	store-operated calcium entry	biological_process	0.0036832	0.39243	3	702	8	20361	1.01114e+26
GO:0010959	regulation of metal ion transport	biological_process	0.0036832	0.39243	3	702	8	20361	1.01114e+26
GO:0043269	regulation of ion transport	biological_process	0.0036832	0.39243	3	702	8	20361	1.01115e+26
GO:0051924	regulation of calcium ion transport	biological_process	0.0036832	0.39243	3	702	8	20361	1.01107e+26
GO:2001256	regulation of store-operated calcium entry	biological_process	0.0036832	0.39243	3	702	8	20361	1.01114e+26
GO:0038023	signaling receptor activity	molecular_function	0.0037613	0.39243	57	702	2000	20361	101105655,101106544,101113787,101114912,101104560,101107319,101115356,101118356,101103501,101121647,101104175,101107660,101113240,101107807,101104424,443412,101114869,101104227,101105356,101104100,101101902,101114434,101111884,101119515,101119227,101121309,101102897,101115539,101104488,101109271,101110673,101120749,443271,101123028,101107691,101111867,101122472,443274,101112636,100170317,10064217…
GO:0010033	response to organic substance	biological_process	0.0040349	0.39243	11	702	104	20361	4.43412e+92
GO:0034654	nucleobase-containing compound biosynthetic process	biological_process	0.0041306	0.39243	117	702	2626	20361	101112580,101117609,100169935,101103276,101114392,101118475,101111501,101117106,101101949,443189,101108379,101109713,101115695,101122496,101111386,101122150,101109289,101123644,101105645,101107476,101101895,101115273,101103126,101107196,101106329,101115163,101105618,101116716,101105239,101121532,101110276,101107891,100217409,100135699,100653388,101121782,101115361,101115490,101112408,100820740,44…
GO:0004872	receptor activity	molecular_function	0.0041715	0.39243	61	702	2090	20361	100642179,100170317,101116045,101122472,101112636,443274,101107691,101111867,101123028,443271,101120749,101109271,101110673,443189,101108067,443273,101108204,100147707,101109946,101104135,101113274,101118816,101109535,101110938,105616317,101112233,101109996,101110298,101111639,101109245,101104424,101107807,101113240,101107660,101104175,101121647,101115356,101118356,101103501,101113787,101107319,1…
GO:0004871	signal transducer activity	molecular_function	0.0041894	0.39243	65	702	2206	20361	101107691,100170317,101122472,101112636,443274,101120749,101112460,101109271,101123028,443271,101109946,101109535,101110938,101118816,443189,100147707,101121279,101113240,101104424,101107807,101113487,101105655,101103501,101115356,101107319,101113787,101114912,101123371,101102897,101121309,101119227,101114869,443412,101119515,101114434,101104100,101111867,100642179,101110673,101113274,101104135,1…
GO:0060089	molecular transducer activity	molecular_function	0.0041894	0.39243	65	702	2206	20361	101104227,101105356,101111884,101101902,101104488,101115539,101104560,101118356,101106544,101107438,101122961,101121647,101104175,101107660,101109996,101112233,105616317,101109245,101111639,101110298,443273,101108067,101102074,101104135,101114927,101113274,101110673,100642179,101111867,101104100,101114434,101119515,443412,101114869,101121309,101119227,101102897,101113787,101114912,101107319,10112…
GO:1901362	organic cyclic compound biosynthetic process	biological_process	0.0042122	0.39243	125	702	2821	20361	101115623,101109781,101122265,101114771,101113487,101104912,101113586,101109328,101122401,101108320,101114682,101115611,101118975,101110051,101104434,101114883,101109113,101123504,100135687,101118837,100217409,100135699,100653388,101115361,101115490,101121782,100820740,101112408,443412,101110276,101121532,101107891,101115163,101106329,101105618,101105239,101116716,101101895,101107476,101115273,10…
GO:0019438	aromatic compound biosynthetic process	biological_process	0.0045474	0.41502	122	702	2755	20361	101104380,101122655,101122913,101113223,101104647,100642179,101109515,101116201,101104131,101105452,101108256,101116194,101115197,101108012,101122358,101104304,101103795,443262,101115254,101119298,105605100,101102074,101108317,101111845,101116328,101123350,101122806,101121620,101106986,101107789,101103984,101104902,101122961,101107483,101110686,101117436,101106824,101111545,101112046,101117084,10…
GO:0014070	response to organic cyclic compound	biological_process	0.0048775	0.43436	8	702	63	20361	1.01102e+65
GO:0070887	cellular response to chemical stimulus	biological_process	0.0049536	0.43436	9	702	77	20361	1.00653e+74
GO:0009987	cellular process	biological_process	0.0052528	0.43872	435	702	12236	20361	101118097,101104488,101113687,101114511,101119282,101113935,101113261,101105356,101102402,101111884,101111717,101120976,101115833,101119369,101110686,101111207,101106781,101116580,101117084,443068,101110805,101104156,101106544,101107495,101102901,101116309,101119298,101115465,101102074,101105428,554257,101104135,105616317,101118166,101114282,101109245,101104002,101107789,101122913,101122606,10064…
GO:0007154	cell communication	biological_process	0.005532	0.43872	128	702	3632	20361	101111683,101111639,101118762,101103984,101109996,101111278,101117172,101114927,101106623,101110673,101115582,101115253,101123443,101115539,101104309,101114854,101104560,101110391,101118356,101108271,101121647,101122961,101106340,101114909,101119989,101121279,101109535,101110938,101101931,101116641,101109271,101112460,101109289,101114233,101123028,101116716,101101895,101104973,443412,101114869,10…
GO:0071941	nitrogen cycle metabolic process	biological_process	0.00556	0.43872	4	702	22	20361	1.01118e+35
GO:0042126	nitrate metabolic process	biological_process	0.0055919	0.43872	3	702	10	20361	1.01118e+26
GO:0042128	nitrate assimilation	biological_process	0.0055919	0.43872	3	702	10	20361	1.01118e+26
GO:2001057	reactive nitrogen species metabolic process	biological_process	0.0055919	0.43872	3	702	10	20361	1.01118e+26
GO:0009719	response to endogenous stimulus	biological_process	0.0057678	0.44472	10	702	93	20361	1.0111e+83
GO:0043169	cation binding	molecular_function	0.006303	0.4626	155	702	3456	20361	101108803,101109289,101111386,101114233,101123062,101104181,101115163,101104040,105615271,101111501,101119989,101109302,101104136,101106954,101115695,101111593,101108650,101103929,101114034,101123195,443010,101108444,101104912,101105027,101113943,101109559,101116855,101101882,101113270,101103679,101114169,101117026,101121916,443412,101115211,100653388,101105882,106991568,101105233,101118505,10112…
GO:0006351	transcription, DNA-dependent	biological_process	0.006625	0.4626	106	702	2381	20361	101116201,101109515,101122913,101104380,101122655,100642179,101113223,101104647,101122358,101108012,101105452,101104131,101115197,101108256,101116194,101102074,105605100,101116328,101111845,101108317,101103795,101104304,101119298,443262,101106986,101122806,101121620,101103984,101123350,101106824,101111545,101107483,101122961,101117436,101110686,101104902,101107495,101117084,101112046,105602103,44…
GO:0023052	signaling	biological_process	0.0066416	0.4626	126	702	3591	20361	101106544,101110391,101104560,101118356,101123633,101108271,101121647,101104175,101111207,101107660,101116580,101109277,101123183,101107438,101111988,101119369,101122961,101107483,101113454,101117137,443513,101114291,101113935,101111884,101117299,101115539,101104488,101104309,101114854,101110673,101115582,101116194,101108667,101112579,101114918,101115253,101123443,101122281,101109245,101114282,10…
GO:0000977	RNA polymerase II regulatory region sequence-specific DNA binding	molecular_function	0.0070055	0.4626	2	702	3	20361	1.01107e+17
GO:0000978	RNA polymerase II core promoter proximal region sequence-specific DNA binding	molecular_function	0.0070055	0.4626	2	702	3	20361	1.01116e+17
GO:0000982	RNA polymerase II core promoter proximal region sequence-specific DNA binding transcription factor activity	molecular_function	0.0070055	0.4626	2	702	3	20361	1.01116e+17
GO:0000987	core promoter proximal region sequence-specific DNA binding	molecular_function	0.0070055	0.4626	2	702	3	20361	1.01107e+17
GO:0001012	RNA polymerase II regulatory region DNA binding	molecular_function	0.0070055	0.4626	2	702	3	20361	1.01107e+17
GO:0001159	core promoter proximal region DNA binding	molecular_function	0.0070055	0.4626	2	702	3	20361	1.01116e+17
GO:0034593	phosphatidylinositol bisphosphate phosphatase activity	molecular_function	0.0075514	0.4626	3	702	11	20361	4.43513e+23
GO:0034596	phosphatidylinositol phosphate 4-phosphatase activity	molecular_function	0.0075514	0.4626	3	702	11	20361	1.0112e+23
GO:0034597	phosphatidylinositol-4,5-bisphosphate 4-phosphatase activity	molecular_function	0.0075514	0.4626	3	702	11	20361	4.43513e+23
GO:0046839	phospholipid dephosphorylation	biological_process	0.0075514	0.4626	3	702	11	20361	4.43513e+23
GO:0046856	phosphatidylinositol dephosphorylation	biological_process	0.0075514	0.4626	3	702	11	20361	1.0112e+23
GO:0052866	phosphatidylinositol phosphate phosphatase activity	molecular_function	0.0075514	0.4626	3	702	11	20361	1.01108e+23
GO:0005230	extracellular ligand-gated ion channel activity	molecular_function	0.0077271	0.46697	10	702	96	20361	1.01122e+80
GO:0044700	single organism signaling	biological_process	0.0079559	0.47438	125	702	3585	20361	101110673,101115582,101116194,101108667,101112579,101114918,101115253,101123443,101122281,101111683,101109245,101114282,101111639,101118166,101110298,101107789,101118762,101103984,101109996,101112233,554257,101102074,101104135,101114927,101111278,101117172,101111845,101106623,101106544,101104560,101110391,101118356,101123633,101121647,101108271,101104175,101111207,101107660,101109277,101116580,10…
GO:0007165	signal transduction	biological_process	0.008166	0.47614	124	702	3563	20361	101106544,101123633,101118356,101104560,101110391,101111207,101104175,101121647,101108271,101107660,101116580,101109277,101119369,101123183,101107438,101111988,101107483,101122961,101113454,101117137,101114291,443513,101113935,101111884,101117299,101115539,101104488,101104309,101114854,101115582,101110673,101116194,101112579,101108667,101115253,101114918,101122281,101123443,101118166,101111639,10…
GO:0044212	transcription regulatory region DNA binding	molecular_function	0.0087263	0.47614	3	702	10	20361	1.05605e+26
GO:0033993	response to lipid	biological_process	0.0088934	0.47614	7	702	54	20361	4.43513e+56
GO:0043401	steroid hormone mediated signaling pathway	biological_process	0.0088934	0.47614	7	702	54	20361	4.43412e+56
GO:0048545	response to steroid hormone stimulus	biological_process	0.0088934	0.47614	7	702	54	20361	4.43513e+56
GO:0071383	cellular response to steroid hormone stimulus	biological_process	0.0088934	0.47614	7	702	54	20361	1.00653e+56
GO:0071396	cellular response to lipid	biological_process	0.0088934	0.47614	7	702	54	20361	1.0017e+56
GO:0071407	cellular response to organic cyclic compound	biological_process	0.0088934	0.47614	7	702	54	20361	1.01102e+56
GO:0046872	metal ion binding	molecular_function	0.0089436	0.47614	153	702	3438	20361	101104040,105615271,101115163,101104181,101111386,101114233,101123062,101109289,101108803,443010,101103929,101114034,101123195,101111593,101108650,101115695,101106954,101104136,101109302,101119989,101113270,101103679,101117026,101114169,101101882,101116855,101113943,101109559,101105027,101104912,101108444,101120609,105613870,101121788,101118505,101105233,106991568,100653388,101115211,101105882,10…
GO:0044763	single-organism cellular process	biological_process	0.0095459	0.50223	267	702	7273	20361	101118762,101102193,101103984,101111683,101122806,101111639,101117032,101109996,101114927,101117172,101111278,101114112,101113497,101101892,101102973,101115253,101123443,101103123,101107863,100125358,101104486,101113095,101119972,101104309,101122922,105605801,101107392,101116835,101119199,101110391,101104560,101121829,101122279,101108271,101121647,101122961,101108960,101121279,101101931,101108379…
GO:0009725	response to hormone stimulus	biological_process	0.010132	0.52686	9	702	84	20361	1.01102e+74
GO:0004970	ionotropic glutamate receptor activity	molecular_function	0.010923	0.55511	6	702	40	20361	4.43273e+44
GO:0008066	glutamate receptor activity	molecular_function	0.010923	0.55511	6	702	40	20361	4.43273e+44
GO:0016791	phosphatase activity	molecular_function	0.011405	0.56852	22	702	295	20361	1.01119e+194
GO:0022857	transmembrane transporter activity	molecular_function	0.011442	0.56852	73	702	1455	20361	101105356,101102663,100125358,101101902,101103292,101111717,101102401,100913155,101113357,101113095,101119199,100294558,105605801,101109931,101120605,101104156,101106170,101123485,101106781,101104247,101121614,101111639,443273,101120429,101116194,101122358,101122655,101103123,100642179,101108667,101108467,101112056,101107891,101118505,101118936,101113767,101115361,101116928,101120904,101111828,10…
GO:0001071	nucleic acid binding transcription factor activity	molecular_function	0.013316	0.63925	42	702	804	20361	101108012,101105452,101116194,101116201,101107196,101121620,101123350,101118475,101114392,100169935,101115695,101109713,101111845,101116328,101104304,443189,101113586,101104912,101117084,101108320,101115611,101105027,105602103,101109328,101106824,101122265,101114771,101122961,101117436,101104902,443412,100653388,100217409,101115490,443513,100125358,101116062,101102402,101110276,101121532,10111005…
GO:0003700	sequence-specific DNA binding transcription factor activity	molecular_function	0.013316	0.63925	42	702	804	20361	100169935,101118475,101114392,101123350,101121620,443189,101104304,101111845,101116328,101109713,101115695,101116194,101105452,101108012,101107196,101116201,101110276,101121532,101116062,101102402,100125358,443513,101115490,100217409,100653388,443412,101110051,101104434,105602103,101109328,101115611,101105027,101117084,101108320,101113586,101104912,101104902,101117436,101122961,101114771,10112226…
GO:0042578	phosphoric ester hydrolase activity	molecular_function	0.013435	0.63925	27	702	377	20361	443513,101119989,101112408,100820740,101118505,101114027,101109302,101119906,101106954,101113174,101102003,101119972,101123195,101112333,101101909,101111299,101107646,101108803,101113628,101112093,101115582,101117580,101121483,101112759,101119265,101119369,101106001
GO:0006816	calcium ion transport	biological_process	0.013437	0.63925	5	702	32	20361	1.01107e+44
GO:0043531	ADP binding	molecular_function	0.013649	0.64252	6	702	47	20361	1.00148e+53
GO:0000775	chromosome, centromeric region	cellular_component	0.014277	0.66509	12	702	170	20361	1.01121e+107
GO:0008982	protein-N(PI)-phosphohistidine-sugar phosphotransferase activity	molecular_function	0.015699	0.72379	3	702	16	20361	1.01109e+26
GO:0005215	transporter activity	molecular_function	0.016042	0.73205	81	702	1668	20361	101108667,101122055,101122655,101103123,100642179,101122358,101120429,101116194,101116975,443273,101111639,100862656,101121614,101106781,101104247,101123485,101106170,100294558,101109931,101104156,105605801,101120605,101119199,101113095,101113357,100913155,101119972,101102401,101103292,101111717,100125358,101105356,101102663,101101902,101105618,101110415,101112636,443274,101119694,101112165,10111…
GO:0044699	single-organism process	biological_process	0.017658	0.79521	294	702	8130	20361	101101892,101113497,101123443,101103123,101115253,101102973,101117032,101109996,101121614,101102193,101103984,101118762,101111639,101111683,101122806,101114112,101117172,101114927,101111278,101110391,101119199,101104560,101121829,105605801,101122922,101116835,100294558,101107392,101122961,101122279,101121647,101104074,101108271,100125358,101107863,101119972,101104309,101104486,101113095,101106620…
GO:0000976	transcription regulatory region sequence-specific DNA binding	molecular_function	0.017782	0.79521	2	702	5	20361	1.01107e+17
GO:0050896	response to stimulus	biological_process	0.018733	0.81476	168	702	4900	20361	101107275,101116876,101113240,101115623,101108320,101114912,101120630,101102729,101110045,101119227,101121309,101102897,101107891,101119515,101114027,101108973,101111914,101118500,101109979,101119694,100170317,101107476,101107691,101110972,101112083,101107985,101122496,101120749,100147707,101102681,443189,101118816,101109713,101109946,101105642,101103746,101102610,100169935,101113126,101110030,10…
GO:0051716	cellular response to stimulus	biological_process	0.01893	0.81476	138	702	4042	20361	101119515,101114027,101107891,101108973,101120630,101102897,101121309,101114912,101108320,101107275,101116876,101113240,101115623,100169935,101102610,101110030,443189,101102681,100147707,101109946,101103746,101105642,101118816,101109713,101112083,101110972,101107985,101120749,101107476,101109979,101119694,100170317,101107691,101111884,101113935,101114291,443513,101117137,101104488,101117299,10112…
GO:0005216	ion channel activity	molecular_function	0.018948	0.81476	29	702	469	20361	100913155,443273,101111828,101105356,101102663,101112056,101121614,101120031,101101902,101111639,100233164,101102401,101115361,101118500,101119694,443274,101122655,101103123,101103126,101123485,101120429,443488,101105027,101103501,101107319,443271,101120605,101122358,101111919
GO:0022838	substrate-specific channel activity	molecular_function	0.018948	0.81476	29	702	469	20361	101115361,101102401,100233164,101111639,101101902,101120031,101112056,101121614,101102663,101105356,101111828,443273,100913155,101111919,101120605,101122358,101107319,443271,101103501,101105027,443488,101120429,101123485,101103126,101103123,101122655,443274,101119694,101118500
GO:0000390	spliceosomal complex disassembly	biological_process	0.019918	0.81648	1	702	1	20361	443068
GO:0005684	U2-type spliceosomal complex	cellular_component	0.019918	0.81648	1	702	1	20361	443068
GO:0032988	ribonucleoprotein complex disassembly	biological_process	0.019918	0.81648	1	702	1	20361	443068
GO:0071008	U2-type post-mRNA release spliceosomal complex	cellular_component	0.019918	0.81648	1	702	1	20361	443068
GO:0071014	post-mRNA release spliceosomal complex	cellular_component	0.019918	0.81648	1	702	1	20361	443068
GO:0042720	mitochondrial inner membrane peptidase complex	cellular_component	0.020157	0.81648	1	702	1	20361	101106329
GO:0015267	channel activity	molecular_function	0.020449	0.81648	29	702	472	20361	101103123,101103126,101123485,101119694,101118500,443274,101122655,101120605,101122358,101111919,101103501,101107319,443271,101120429,443488,101105027,101111828,443273,100913155,101115361,101111639,100233164,101102401,101120031,101101902,101105356,101102663,101112056,101121614
GO:0022803	passive transmembrane transporter activity	molecular_function	0.020449	0.81648	29	702	472	20361	101103123,101103126,101123485,101118500,101119694,101122655,443274,101103501,443271,101107319,101120429,443488,101105027,101120605,101122358,101111919,443273,100913155,101111828,101120031,101101902,101105356,101102663,101112056,101121614,101115361,101111639,100233164,101102401
GO:0033926	glycopeptide alpha-N-acetylgalactosaminidase activity	molecular_function	0.020842	0.82481	2	702	4	20361	1.01121e+17
GO:0019080	viral genome expression	biological_process	0.021903	0.85921	5	702	45	20361	1.01115e+44
GO:0030234	enzyme regulator activity	molecular_function	0.023823	0.92639	33	702	588	20361	101110972,101111386,101107985,101113888,443274,101122281,101121946,101121279,101111683,101110030,101112081,100147707,101102681,101116641,101102920,101111593,101113311,101102133,101106341,101113454,101108733,101112340,101102884,101112056,100125358,101118505,101105233,101104973,101106069,101120630,101104118,101115508,101118975
GO:0030111	regulation of Wnt receptor signaling pathway	biological_process	0.024464	0.94313	3	702	17	20361	1.01117e+26
GO:0030258	lipid modification	biological_process	0.026383	1	4	702	28	20361	1.01111e+32
GO:0043167	ion binding	molecular_function	0.026431	1	233	702	5471	20361	101119632,101118863,105616317,101123626,101122334,101107321,101110667,101107789,101109245,101115254,101102901,101116328,101111845,105605100,101105428,554257,101102074,101116194,101116956,101111299,101113628,101119564,101104285,101120982,101107106,101114918,101121946,101104860,105611834,101112579,101120651,101120845,101102402,443513,101114291,105615370,101114267,101117901,101108178,101118097,10110…
GO:0030865	cortical cytoskeleton organization	biological_process	0.028814	1	3	702	12	20361	1.01107e+26
GO:0030866	cortical actin cytoskeleton organization	biological_process	0.028814	1	3	702	12	20361	1.01118e+26
GO:0019049	evasion or tolerance of host defenses by virus	biological_process	0.029047	1	3	702	18	20361	1.01121e+26
GO:0002532	production of molecular mediator involved in inflammatory response	biological_process	0.029991	1	2	702	6	20361	1.00642e+17
GO:0004896	cytokine receptor activity	molecular_function	0.029991	1	2	702	6	20361	1.01113e+17
GO:0022836	gated channel activity	molecular_function	0.030228	1	18	702	277	20361	1.0112e+152
GO:0022839	ion gated channel activity	molecular_function	0.030228	1	18	702	277	20361	1.01115e+152
GO:0005158	insulin receptor binding	molecular_function	0.03023	1	3	702	19	20361	1.01102e+26
GO:0090304	nucleic acid metabolic process	biological_process	0.030311	1	154	702	3796	20361	101104912,101113487,101105473,101123503,101113270,101120495,101114771,443412,101112408,100653388,100217409,101121782,101115490,101110276,101121532,101110314,101123504,101111828,101121788,101104434,101110051,101112460,101105645,101109289,101111386,101116716,101105239,101115163,443274,101112636,101101895,101115273,101111501,101117106,101109302,101118475,101114392,101112580,101115695,101108379,10110…
GO:0008150	biological_process	biological_process	0.030798	1	521	702	15203	20361	101117758,101110030,101113126,101109663,100147707,101121019,101115777,101113598,101108411,101105792,101115891,101107166,101109979,101119694,101112165,100170317,101117488,101115361,100135699,101111914,100820740,101114027,101107891,101114883,101121309,101119227,100135687,101102729,101102311,101104199,101109328,768095,101105524,443488,101103590,101119602,101109781,101114282,101113311,101116975,10111…
GO:0006139	nucleobase-containing compound metabolic process	biological_process	0.031377	1	166	702	4120	20361	101108670,101116625,101104486,101107758,101111609,101116062,100125358,101103292,101122961,101117436,101104449,101111545,101119512,101106824,101108271,105602103,101119199,101112046,101109980,443262,443440,101104304,101114112,100913156,101108317,101107295,101123350,101108762,101103984,101106986,101122806,101104647,101104380,101105693,101116201,101115197,101105452,101120429,101122358,101112880,10110…
GO:0022891	substrate-specific transmembrane transporter activity	molecular_function	0.031448	1	60	702	1244	20361	443273,101108183,101114431,101120031,101109149,101121614,101106340,101111639,100233164,101103123,101103126,101109979,101118500,101119694,101122655,443274,101112636,101105618,101108667,101116194,101104181,443271,101120429,101122358,101120904,101116928,100913155,101122005,101113357,101113095,101111828,101101902,101118505,101102663,101108467,101105356,101107891,101112056,100125358,101115361,10111376…
GO:0008201	heparin binding	molecular_function	0.033074	1	3	702	16	20361	1.01112e+26
GO:0006954	inflammatory response	biological_process	0.03402	1	3	702	23	20361	1.00642e+26
GO:0070838	divalent metal ion transport	biological_process	0.034142	1	9	702	128	20361	1.01116e+80
GO:0005246	calcium channel regulator activity	molecular_function	0.034327	1	4	702	33	20361	1.01112e+35
GO:0005747	mitochondrial respiratory chain complex I	cellular_component	0.034487	1	4	702	32	20361	1.01113e+35
GO:0030964	NADH dehydrogenase complex	cellular_component	0.034487	1	4	702	32	20361	1.01112e+35
GO:0045271	respiratory chain complex I	cellular_component	0.034487	1	4	702	32	20361	1.01113e+35
GO:0072511	divalent inorganic cation transport	biological_process	0.034873	1	10	702	143	20361	1.01109e+89
GO:0046483	heterocycle metabolic process	biological_process	0.035441	1	172	702	4278	20361	101119170,101117299,101114511,101113687,101118097,105615177,443513,101120976,101102402,101110686,101107483,101104902,101106170,101106341,101104156,101107495,101112525,443068,101117084,101111845,101116328,101119906,101102074,101105428,105605100,101115254,101119298,101103795,101107789,101107321,101121620,101109515,100642179,101122281,101108732,101113223,101122913,101122655,101122606,101116194,10111…
GO:0051225	spindle assembly	biological_process	0.035533	1	2	702	10	20361	1.01102e+17
GO:0006338	chromatin remodeling	biological_process	0.036748	1	4	702	29	20361	1.01122e+35
GO:0060962	regulation of ribosomal protein gene transcription from RNA polymerase II promoter	biological_process	0.036951	1	1	702	2	20361	101116328
GO:0000975	regulatory region DNA binding	molecular_function	0.03701	1	3	702	23	20361	1.05605e+26
GO:0001067	regulatory region nucleic acid binding	molecular_function	0.03701	1	3	702	23	20361	1.01116e+26
GO:0019855	calcium channel inhibitor activity	molecular_function	0.037258	1	3	702	21	20361	1.01119e+26
GO:0008948	oxaloacetate decarboxylase activity	molecular_function	0.042123	1	4	702	30	20361	1.01113e+35
GO:0035725	sodium ion transmembrane transport	biological_process	0.042123	1	4	702	30	20361	1.01105e+35
GO:0071436	sodium ion export	biological_process	0.042123	1	4	702	30	20361	1.01105e+35
GO:0010324	membrane invagination	biological_process	0.045481	1	1	702	2	20361	101111207
GO:0016237	microautophagy	biological_process	0.045481	1	1	702	2	20361	101111207
GO:0034448	EGO complex	cellular_component	0.045481	1	1	702	2	20361	101111207
GO:0030683	evasion or tolerance by virus of host immune response	biological_process	0.046329	1	2	702	10	20361	1.01103e+17
GO:0003993	acid phosphatase activity	molecular_function	0.048099	1	11	702	118	20361	1.01113e+98
GO:0048306	calcium-dependent protein binding	molecular_function	0.04833	1	1	702	1	20361	101111609
GO:0034641	cellular nitrogen compound metabolic process	biological_process	0.049192	1	173	702	4359	20361	101115490,101121782,100217409,100653388,101112408,443412,101110276,101121532,101104544,101104434,101121788,101110051,101111828,101123504,101110314,101102003,101113487,101104912,101113635,101122401,101105473,101123503,101120495,101114771,101113270,101117106,101111501,101112580,101114392,101118475,101109302,101108379,101115695,101107739,101101949,101109405,101109289,101105645,101112460,101111386,10…
GO:0046983	protein dimerization activity	molecular_function	0.049719	1	18	702	348	20361	1.01109e+158
GO:0017046	peptide hormone binding	molecular_function	0.050345	1	1	702	3	20361	100217409
GO:0042562	hormone binding	molecular_function	0.050345	1	1	702	3	20361	100217409
GO:0051424	corticotropin-releasing hormone binding	molecular_function	0.050345	1	1	702	3	20361	100217409
GO:0005092	GDP-dissociation inhibitor activity	molecular_function	0.050885	1	1	702	3	20361	101106069
GO:0005094	Rho GDP-dissociation inhibitor activity	molecular_function	0.050885	1	1	702	3	20361	101106069
GO:0045132	meiotic chromosome segregation	biological_process	0.051124	1	2	702	10	20361	1.0111e+17
GO:0006814	sodium ion transport	biological_process	0.051805	1	8	702	95	20361	1.01103e+68
GO:1901360	organic cyclic compound metabolic process	biological_process	0.052303	1	172	702	4337	20361	101104434,101121788,101110051,101104544,101123504,101110314,101111828,101102003,100653388,100217409,101121782,101115490,443412,101112408,101121532,101110276,101123503,101113270,101114771,101120495,101113487,101104912,101122401,101105473,101108379,101115695,101109405,101101949,101107739,101111501,101117106,101112580,101109302,101118475,101114392,101115163,101105618,101105239,101116716,101101895,10…
GO:0004930	G-protein coupled receptor activity	molecular_function	0.052971	1	40	702	1789	20361	100170317,101112636,101107691,101123028,101120749,101110673,101109271,443189,101108067,100147707,101109946,101104135,101109535,101118816,101110938,101112233,101109996,101110298,101111639,101109245,101104424,101113240,101107660,101104175,101121647,101118356,101104560,101113787,101114912,101106544,101105655,101104488,101115539,101102897,101119227,101121309,101119515,101111884,101114434,101114869
GO:0070070	proton-transporting V-type ATPase complex assembly	biological_process	0.05363	1	2	702	13	20361	1.01111e+17
GO:0070072	vacuolar proton-transporting V-type ATPase complex assembly	biological_process	0.05363	1	2	702	13	20361	1.01111e+17
GO:0006725	cellular aromatic compound metabolic process	biological_process	0.05379	1	170	702	4289	20361	101102681,443189,101109713,101109663,101102610,101117609,101121880,100169935,101103276,100233164,101107166,101107196,101118500,101103126,101107476,101119442,101106329,101122150,101122496,101105203,101123644,101108755,100135687,101109113,101114883,101118975,101107891,100820740,101115361,101118837,100135699,101122265,101109781,101115623,101115611,101108320,101114682,101109328,101113586,101103795,10…
GO:0032879	regulation of localization	biological_process	0.05424	1	8	702	95	20361	1.0112e+71
GO:0006336	DNA replication-independent nucleosome assembly	biological_process	0.054713	1	2	702	10	20361	1.01105e+17
GO:0031055	chromatin remodeling at centromere	biological_process	0.054713	1	2	702	10	20361	1.01105e+17
GO:0034080	CENP-A containing nucleosome assembly at centromere	biological_process	0.054713	1	2	702	10	20361	1.01115e+17
GO:0034724	DNA replication-independent nucleosome organization	biological_process	0.054713	1	2	702	10	20361	1.01105e+17
GO:0043486	histone exchange	biological_process	0.054713	1	2	702	10	20361	1.01105e+17
GO:0015075	ion transmembrane transporter activity	molecular_function	0.055509	1	56	702	1191	20361	101111639,100233164,101106340,101121614,101120031,101114431,101108183,443273,101122358,101120429,101116194,101104181,443271,101108667,101105618,101119694,101118500,101109979,101122655,443274,101103123,101103126,101113767,101102401,101115361,101108467,101102663,101105356,101107891,101112056,100125358,101118505,101101902,101113095,101113357,101111828,101122005,101116928,100913155,101120904,10112346…
GO:0006399	tRNA metabolic process	biological_process	0.056191	1	15	702	249	20361	1.01107e+134
GO:0007339	binding of sperm to zona pellucida	biological_process	0.057098	1	3	702	18	20361	1.01102e+26
GO:0008037	cell recognition	biological_process	0.057098	1	3	702	18	20361	1.01112e+26
GO:0009988	cell-cell recognition	biological_process	0.057098	1	3	702	18	20361	1.01114e+26
GO:0035036	sperm-egg recognition	biological_process	0.057098	1	3	702	18	20361	1.01102e+26
GO:0070071	proton-transporting two-sector ATPase complex assembly	biological_process	0.058618	1	2	702	14	20361	1.01122e+17
GO:0004675	transmembrane receptor protein serine/threonine kinase activity	molecular_function	0.059118	1	4	702	43	20361	1.01112e+35
GO:0030178	negative regulation of Wnt receptor signaling pathway	biological_process	0.059501	1	2	702	12	20361	1.01117e+17
GO:0005743	mitochondrial inner membrane	cellular_component	0.05977	1	9	702	157	20361	1.01108e+80
GO:0003674	molecular_function	molecular_function	0.060899	1	604	702	17899	20361	105605100,101112637,101106898,101104061,101108204,101103795,101121620,105604107,101123626,101118863,101112175,101112233,101120651,105611834,101108667,101102100,101119564,101108732,101113223,101108654,101104131,101116956,101108584,101117299,101107989,101108178,101104118,101117901,101117137,101116529,101102205,101120845,101104175,101107660,101107438,101107483,101106170,101112525,101109713,101103746…
GO:0006269	DNA replication, synthesis of RNA primer	biological_process	0.062384	1	2	702	14	20361	1.01117e+17
GO:0030151	molybdenum ion binding	molecular_function	0.063222	1	2	702	10	20361	1.01112e+17
GO:0006783	heme biosynthetic process	biological_process	0.063443	1	3	702	21	20361	1.01122e+26
GO:0034660	ncRNA metabolic process	biological_process	0.064465	1	18	702	331	20361	1.01119e+158
GO:0032403	protein complex binding	molecular_function	0.064502	1	8	702	141	20361	1.01107e+71
GO:0044413	avoidance of host defenses	biological_process	0.065689	1	3	702	24	20361	1.01121e+26
GO:0044415	evasion or tolerance of host defenses	biological_process	0.065689	1	3	702	24	20361	1.01121e+26
GO:0051832	avoidance of defenses of other organism involved in symbiotic interaction	biological_process	0.065689	1	3	702	24	20361	1.01103e+26
GO:0051834	evasion or tolerance of defenses of other organism involved in symbiotic interaction	biological_process	0.065689	1	3	702	24	20361	1.05613e+26
GO:0052173	response to defenses of other organism involved in symbiotic interaction	biological_process	0.065689	1	3	702	24	20361	1.05613e+26
GO:0052200	response to host defenses	biological_process	0.065689	1	3	702	24	20361	1.01103e+26
GO:0075136	response to host	biological_process	0.065689	1	3	702	24	20361	1.01103e+26
GO:0000280	nuclear division	biological_process	0.06584	1	7	702	116	20361	1.01115e+62
GO:0007067	mitosis	biological_process	0.06584	1	7	702	116	20361	1.01111e+62
GO:0008939	nicotinate-nucleotide-dimethylbenzimidazole phosphoribosyltransferase activity	molecular_function	0.0665	1	1	702	1	20361	101105203
GO:0090307	spindle assembly involved in mitosis	biological_process	0.0665	1	1	702	1	20361	101115253
GO:0039624	viral outer capsid	cellular_component	0.0665	1	1	702	1	20361	101117891
GO:0044452	nucleolar part	cellular_component	0.066671	1	2	702	16	20361	1.0112e+17
GO:0008158	hedgehog receptor activity	molecular_function	0.066692	1	3	702	24	20361	1.01115e+26
GO:0001816	cytokine production	biological_process	0.068102	1	3	702	24	20361	1.01108e+26
GO:0001817	regulation of cytokine production	biological_process	0.068102	1	3	702	24	20361	1.01108e+26
GO:0001819	positive regulation of cytokine production	biological_process	0.068102	1	3	702	24	20361	1.01118e+26
GO:0030246	carbohydrate binding	molecular_function	0.068244	1	7	702	94	20361	1.01112e+62
GO:0007010	cytoskeleton organization	biological_process	0.06855	1	23	702	426	20361	1.01112e+206
GO:0019012	virion	cellular_component	0.068811	1	31	702	663	20361	101123350,101111884,101110526,101118166,101108973,100233164,101111683,105609492,101108755,101108178,101120904,101107739,101107989,101104434,101108379,101104867,101112322,101112048,101117891,101104181,101108256,101123469,101120495,101108732,101109732,101106538,101116716,101122279,101115253,101105693,101103590
GO:0005509	calcium ion binding	molecular_function	0.069969	1	30	702	554	20361	101117172,101121788,101108200,101102901,443010,101121916,105615370,101107203,101122334,101115211,101105882,101120845,101104136,101116855,101112579,101101882,101116580,101106868,101104285,101107106,101118500,101119694,101107127,105615271,101117580,101109289,101104912,101123062,101114233,101112525
GO:0000444	MIS12/MIND type complex	cellular_component	0.070086	1	1	702	3	20361	101108379
GO:0033647	host intracellular organelle	cellular_component	0.07157	1	7	702	98	20361	1.05613e+62
GO:0033648	host intracellular membrane-bounded organelle	cellular_component	0.07157	1	7	702	98	20361	1.01103e+62
GO:0019825	oxygen binding	molecular_function	0.072414	1	2	702	19	20361	1.01104e+17
GO:0005515	protein binding	molecular_function	0.072878	1	253	702	6046	20361	101113126,101117609,101121880,101118298,101110030,101102220,443189,101109946,101117581,101122921,106991973,101122496,101120726,101119140,101112165,101117793,101118500,101106001,101118945,101105792,101107476,101119442,101103126,101113483,101112542,101106329,101107891,101114313,101114027,101108973,100820740,100135699,101118837,101115361,101115785,101117488,101102729,101108755,101106634,101120630,10…
GO:0044423	virion part	cellular_component	0.073464	1	29	702	617	20361	101123469,101104181,101108256,101112048,101117891,101122279,101103590,101115253,101106538,101109732,101116716,101120495,105609492,101118166,101110526,101108973,100233164,101111683,101111884,101123350,101104434,101108379,101104867,101112322,101107989,101120904,101107739,101108755,101108178
GO:0044403	symbiosis, encompassing mutualism through parasitism	biological_process	0.073669	1	29	702	611	20361	101118166,101112408,101111501,101115785,101112580,101111372,101104486,101121399,101118097,101102729,101120904,101117784,101115254,101103069,101120726,105612572,101115641,101120749,101117084,101105473,101117891,101104535,101119199,101120756,101109732,101115623,101102623,101105693,101119442
GO:0046148	pigment biosynthetic process	biological_process	0.074043	1	5	702	51	20361	1.01104e+44
GO:0006807	nitrogen compound metabolic process	biological_process	0.074745	1	180	702	4608	20361	101113586,101115611,101108320,101114682,101111953,101109328,101122265,101109781,101115623,100820740,101115361,100135699,101118837,101107891,101114027,101109113,101114883,101118975,101108755,100135687,101105203,101114822,101123644,101122150,101122496,101106329,101107166,101107196,101118500,101103126,101107476,101119442,100233164,101117758,101102610,101117609,101103276,101121880,100169935,101109713…
GO:1901681	sulfur compound binding	molecular_function	0.075571	1	5	702	54	20361	1.01116e+44
GO:0005886	plasma membrane	cellular_component	0.075989	1	19	702	371	20361	1.01111e+167
GO:0015937	coenzyme A biosynthetic process	biological_process	0.075992	1	2	702	13	20361	1.01108e+17
GO:0033866	nucleoside bisphosphate biosynthetic process	biological_process	0.075992	1	2	702	13	20361	1.01108e+17
GO:0034030	ribonucleoside bisphosphate biosynthetic process	biological_process	0.075992	1	2	702	13	20361	1.01108e+17
GO:0034033	purine nucleoside bisphosphate biosynthetic process	biological_process	0.075992	1	2	702	13	20361	1.01122e+17
GO:0019058	viral infectious cycle	biological_process	0.076788	1	15	702	293	20361	1.01113e+134
GO:0044764	multi-organism cellular process	biological_process	0.077013	1	29	702	620	20361	101117891,101117084,101105473,101119199,101104535,101120726,101120749,101115641,101112880,105612572,101119442,101109732,101102623,101105693,101115623,101112580,101111501,101118166,101112408,101115785,101102729,101118097,101103069,101117784,101120904,101115254,101102897,101104486,101121399
GO:0005083	small GTPase regulator activity	molecular_function	0.077402	1	9	702	101	20361	1.01117e+80
GO:0055085	transmembrane transport	biological_process	0.077681	1	46	702	946	20361	101116716,101105618,101110415,101122655,101118500,101103126,101103123,100642179,101122358,101120867,101122496,101104181,101109494,101114431,101122806,100233164,101109626,101109149,101106781,101113961,101123485,101111919,106991784,105605801,101104156,101122922,100302553,101105027,101105473,101105524,101119199,101115356,101113095,101113357,101122005,101116928,101120904,101119972,101102401,101111717…
GO:0047474	long-chain fatty acid luciferin component ligase activity	molecular_function	0.078127	1	1	702	2	20361	101104100
GO:0016772	transferase activity, transferring phosphorus-containing groups	molecular_function	0.079189	1	77	702	1663	20361	101108520,101115582,101122941,101111867,101116201,101120982,101104285,101107106,101107789,101106631,105616317,101105428,105605519,101107495,101109931,101119067,101110391,101102513,101114240,101108271,101107483,101107438,101120976,101114291,101105030,101107425,101102402,101104227,101113687,101119015,101105645,101112460,101122496,101122150,101115777,101115163,101116716,101115273,101107476,101115891…
GO:0044421	extracellular region part	cellular_component	0.079551	1	25	702	482	20361	1.0112e+224
GO:0043772	acyl-phosphate glycerol-3-phosphate acyltransferase activity	molecular_function	0.079655	1	1	702	2	20361	101113270
GO:0044419	interspecies interaction between organisms	biological_process	0.080011	1	29	702	615	20361	101115623,101105693,101102623,101109732,101120756,101119442,101115641,105612572,101120749,101120726,101104535,101119199,101105473,101117084,101117891,101121399,101104486,101111372,101115254,101120904,101117784,101103069,101118097,101102729,101115785,101118166,101111501,101112408,101112580
GO:0046999	regulation of conjugation	biological_process	0.080607	1	1	702	2	20361	101112880
GO:0003880	protein C-terminal carboxyl O-methyltransferase activity	molecular_function	0.081443	1	1	702	4	20361	100037702
GO:0004671	protein C-terminal S-isoprenylcysteine carboxyl O-methyltransferase activity	molecular_function	0.081443	1	1	702	4	20361	100037702
GO:0006481	C-terminal protein methylation	biological_process	0.081443	1	1	702	4	20361	100037702
GO:0018410	C-terminal protein amino acid modification	biological_process	0.081443	1	1	702	4	20361	100037702
GO:0043687	post-translational protein modification	biological_process	0.081443	1	1	702	4	20361	100037702
GO:0004674	protein serine/threonine kinase activity	molecular_function	0.081472	1	14	702	197	20361	1.0111e+122
GO:0048610	cellular process involved in reproduction	biological_process	0.082808	1	14	702	265	20361	1.01118e+125
GO:0003919	FMN adenylyltransferase activity	molecular_function	0.083005	1	1	702	2	20361	101113687
GO:0008849	enterochelin esterase activity	molecular_function	0.08424	1	1	702	2	20361	101103679
GO:0016812	hydrolase activity, acting on carbon-nitrogen (but not peptide) bonds, in cyclic amides	molecular_function	0.085412	1	1	702	2	20361	101107196
GO:0019866	organelle inner membrane	cellular_component	0.08671	1	9	702	164	20361	1.01112e+80
GO:0048285	organelle fission	biological_process	0.087989	1	7	702	125	20361	1.01115e+62
GO:0020012	evasion or tolerance of host immune response	biological_process	0.08826	1	2	702	13	20361	1.05613e+17
GO:0051805	evasion or tolerance of immune response of other organism involved in symbiotic interaction	biological_process	0.08826	1	2	702	13	20361	1.05613e+17
GO:0052564	response to immune response of other organism involved in symbiotic interaction	biological_process	0.08826	1	2	702	13	20361	1.01103e+17
GO:0052572	response to host immune response	biological_process	0.08826	1	2	702	13	20361	1.01103e+17
GO:0070652	HAUS complex	cellular_component	0.088398	1	1	702	4	20361	101102395
GO:0008373	sialyltransferase activity	molecular_function	0.089559	1	3	702	23	20361	1.01123e+26
GO:0042221	response to chemical stimulus	biological_process	0.090033	1	16	702	261	20361	1.01102e+137
GO:0019082	viral protein processing	biological_process	0.090887	1	3	702	31	20361	1.01112e+26
GO:0005217	intracellular ligand-gated ion channel activity	molecular_function	0.092826	1	3	702	33	20361	1.01121e+26
GO:0005218	intracellular ligand-gated calcium channel activity	molecular_function	0.092826	1	3	702	33	20361	1.01121e+26
GO:0005219	ryanodine-sensitive calcium-release channel activity	molecular_function	0.092826	1	3	702	33	20361	1.01121e+26
GO:0006874	cellular calcium ion homeostasis	biological_process	0.092826	1	3	702	33	20361	1.01121e+26
GO:0015278	calcium-release channel activity	molecular_function	0.092826	1	3	702	33	20361	1.01121e+26
GO:0055074	calcium ion homeostasis	biological_process	0.092826	1	3	702	33	20361	1.01119e+26
GO:0072503	cellular divalent inorganic cation homeostasis	biological_process	0.092826	1	3	702	33	20361	1.0112e+26
GO:0072507	divalent inorganic cation homeostasis	biological_process	0.092826	1	3	702	33	20361	1.01119e+26
GO:0034508	centromere complex assembly	biological_process	0.09349	1	4	702	50	20361	1.01121e+35
GO:0022892	substrate-specific transporter activity	molecular_function	0.09367	1	60	702	1332	20361	101122358,101120429,101116194,101104181,443271,101108667,101105618,101118500,101109979,101119694,101122655,443274,101112636,101103123,101103126,101111639,100233164,101106340,101121614,101120031,101109149,101108183,101114431,443273,100294558,101123469,101104156,101109931,101120605,101113487,101111919,101105473,443488,100302553,101105027,101115356,101103501,101107319,101115623,101123485,101106170,1…
GO:0000120	RNA polymerase I transcription factor complex	cellular_component	0.093736	1	1	702	4	20361	101119170
GO:0005668	RNA polymerase transcription factor SL1 complex	cellular_component	0.093736	1	1	702	4	20361	101119170
GO:1901698	response to nitrogen compound	biological_process	0.09399	1	2	702	13	20361	1.01112e+17
GO:0010467	gene expression	biological_process	0.09454	1	136	702	3802	20361	101106329,101107196,101118500,101103126,101107476,101121019,101123644,101122496,101109713,443189,101121880,101117609,100169935,101109149,101122265,101109781,101115623,101113586,101115611,101112759,101108320,101114682,101104199,101109328,101109113,101114883,101118975,101108755,100135687,100820740,101115361,100135699,101107891,101109515,101122655,101122913,101113223,100642179,101122281,101104131,10…
GO:0045226	extracellular polysaccharide biosynthetic process	biological_process	0.094582	1	1	702	2	20361	101116835
GO:0045227	capsule polysaccharide biosynthetic process	biological_process	0.094582	1	1	702	2	20361	101116835
GO:0045230	capsule organization	biological_process	0.094582	1	1	702	2	20361	101116835
GO:0046379	extracellular polysaccharide metabolic process	biological_process	0.094582	1	1	702	2	20361	101116835
GO:0008272	sulfate transport	biological_process	0.096608	1	2	702	12	20361	1.00295e+17
GO:0015116	sulfate transmembrane transporter activity	molecular_function	0.096608	1	2	702	12	20361	1.01114e+17
GO:1901682	sulfur compound transmembrane transporter activity	molecular_function	0.096608	1	2	702	12	20361	1.00295e+17
GO:0016272	prefoldin complex	cellular_component	0.0974	1	3	702	38	20361	1.01113e+26
GO:0005179	hormone activity	molecular_function	0.097567	1	12	702	245	20361	4.43466e+95
GO:0070569	uridylyltransferase activity	molecular_function	0.098304	1	2	702	12	20361	1.01116e+17
GO:0006811	ion transport	biological_process	0.098374	1	53	702	1163	20361	101111919,101104156,101113487,101123469,100294558,101115356,101105027,100302553,101105473,443488,101115623,101123485,101106170,101103679,101115361,101102401,101112408,101113767,101103905,100125358,101112056,101105356,101108043,101102663,101108467,101122005,101106620,101113357,101113095,101120904,100913155,101116928,101122358,101119015,101104181,101116194,101120429,101105618,101108667,101103126,10…
GO:0015936	coenzyme A metabolic process	biological_process	0.098752	1	2	702	16	20361	1.01122e+17
GO:0033865	nucleoside bisphosphate metabolic process	biological_process	0.098752	1	2	702	16	20361	1.01108e+17
GO:0033875	ribonucleoside bisphosphate metabolic process	biological_process	0.098752	1	2	702	16	20361	1.01122e+17
GO:0034032	purine nucleoside bisphosphate metabolic process	biological_process	0.098752	1	2	702	16	20361	1.01122e+17
GO:0007051	spindle organization	biological_process	0.098782	1	2	702	17	20361	1.01115e+17
GO:0000334	3-hydroxyanthranilate 3,4-dioxygenase activity	molecular_function	0.098829	1	1	702	4	20361	101115197
GO:0006779	porphyrin-containing compound biosynthetic process	biological_process	0.099047	1	4	702	43	20361	1.01119e+35
GO:0019083	viral transcription	biological_process	0.09978	1	2	702	14	20361	1.01115e+17
GO:0030261	chromosome condensation	biological_process	0.10051	1	2	702	14	20361	1.01114e+17
GO:0007059	chromosome segregation	biological_process	0.10168	1	6	702	86	20361	1.01106e+53
GO:0004650	polygalacturonase activity	molecular_function	0.10203	1	1	702	2	20361	101116950
GO:0005746	mitochondrial respiratory chain	cellular_component	0.10208	1	4	702	51	20361	1.01103e+35
GO:0015081	sodium ion transmembrane transporter activity	molecular_function	0.10213	1	8	702	110	20361	1.01113e+68
GO:0007186	G-protein coupled receptor signaling pathway	biological_process	0.10271	1	46	702	2007	20361	101111884,101114434,101119515,101114869,101104488,101102897,101115539,101121309,101114912,101113787,101104560,101118356,101108320,101113487,101106544,101105655,101104424,101117047,101115877,101107660,101113806,101113240,101121647,101104175,101112233,101121279,101109996,101110298,101109245,101111639,443189,100147707,101114927,101104135,101109535,101102074,101110938,101118816,101123028,101120749,10…
GO:0051321	meiotic cell cycle	biological_process	0.10291	1	4	702	43	20361	1.0111e+35
GO:0033646	host intracellular part	cellular_component	0.10337	1	7	702	107	20361	1.01118e+62
GO:0043656	intracellular region of host	cellular_component	0.10337	1	7	702	107	20361	1.01103e+62
GO:0030695	GTPase regulator activity	molecular_function	0.10401	1	15	702	226	20361	4.43274e+131
GO:0009059	macromolecule biosynthetic process	biological_process	0.10413	1	136	702	3795	20361	101101949,101109405,101108379,101115695,101112580,101118475,101114392,101117106,101111501,101115273,101101895,101115163,101105239,101116716,101111386,101109289,101105645,101104544,101104434,101121788,101110051,101111828,101123504,101121532,101110276,101121782,101115490,100653388,100217409,443412,101112408,101120495,101114771,101113487,101104912,443262,101104304,101108317,101123350,101103984,10112…
GO:0016032	viral process	biological_process	0.10543	1	26	702	567	20361	101115623,101102623,101105693,101109732,101119442,105612572,101120749,101120726,101104535,101119199,101105473,101117084,101117891,101104486,101121399,101120904,101117784,101115254,101103069,101118097,101102729,101115785,101111501,101118166,101112408,101112580
GO:0016301	kinase activity	molecular_function	0.10572	1	53	702	1088	20361	101102693,101120630,101107709,101110314,101109113,101102402,101104100,101107891,101104227,101114291,101116538,101101994,101105030,101107425,101115612,101107483,101113270,105606759,101107438,101103590,101114878,101102513,101102311,101110391,101104881,101108320,101107495,101119067,443010,101108650,101105428,101112580,105616317,101106631,101109626,101119989,101107789,101118973,101115273,101102157,10…
GO:0043547	positive regulation of GTPase activity	biological_process	0.10617	1	1	702	2	20361	443274
GO:0003677	DNA binding	molecular_function	0.1079	1	97	702	2483	20361	101114267,101114511,101108670,443513,101120976,101103292,101102402,101116062,101112662,100125358,101111545,101108271,101106824,101104902,101106113,101107483,101106341,101119199,101121829,101108317,101111845,101114112,105605100,101102074,101119298,101115254,101103795,101104304,101107789,101108762,101103984,101122806,101119632,105616317,101123350,101116201,101113223,101122281,100642179,101108732,10…
GO:0006996	organelle organization	biological_process	0.10863	1	41	702	915	20361	101110526,101102193,101116170,101118475,101123350,101109149,101105428,101111593,101114112,101114034,101116309,101102681,101115263,101120843,101101892,101102395,101114241,101115253,101112636,101110248,101119564,101105792,101108973,101107863,101121782,101115361,101115490,101108178,101118097,101116625,101120517,101107392,101110805,101118949,101114878,101115356,101120756,106990980,101107438,101115833…
GO:0004860	protein kinase inhibitor activity	molecular_function	0.10917	1	3	702	30	20361	1.01119e+26
GO:0019210	kinase inhibitor activity	molecular_function	0.10917	1	3	702	30	20361	1.01119e+26
GO:0044427	chromosomal part	cellular_component	0.11001	1	14	702	287	20361	1.01116e+125
GO:0006313	transposition, DNA-mediated	biological_process	0.11022	1	4	702	48	20361	1.00233e+35
GO:0032196	transposition	biological_process	0.11022	1	4	702	48	20361	1.01123e+35
GO:0060589	nucleoside-triphosphatase regulator activity	molecular_function	0.11042	1	17	702	278	20361	1.01111e+149
GO:0051188	cofactor biosynthetic process	biological_process	0.11101	1	9	702	136	20361	1.01122e+80
GO:0004803	transposase activity	molecular_function	0.1111	1	3	702	31	20361	1.01123e+26
GO:0005102	receptor binding	molecular_function	0.11114	1	31	702	759	20361	101120651,101105341,101106889,106990980,101105074,101113427,101115840,101122496,443053,105605519,101120186,101109289,101122523,101102729,101102220,101117784,443189,101121032,101102468,101121788,101104486,443337,101101931,443466,101113261,443056,101113126,443412,101108973,101103984,101109737
GO:0046782	regulation of viral transcription	biological_process	0.11186	1	1	702	4	20361	101115254
GO:0051240	positive regulation of multicellular organismal process	biological_process	0.11196	1	3	702	31	20361	1.01108e+26
GO:0016558	protein import into peroxisome matrix	biological_process	0.11207	1	1	702	2	20361	101109149
GO:0016560	protein import into peroxisome matrix, docking	biological_process	0.11207	1	1	702	2	20361	101109149
GO:0006826	iron ion transport	biological_process	0.11272	1	6	702	101	20361	1.01113e+53
GO:0034645	cellular macromolecule biosynthetic process	biological_process	0.11296	1	134	702	3755	20361	105615177,101117901,101114511,101119170,101107989,101102402,101120976,443513,101106341,101110686,101107483,101104902,101117084,443068,101107495,101103795,101119298,101102074,105605100,101116328,101111845,101121620,101122913,101122655,101122606,101122281,100642179,101113223,101109515,101104131,101108256,101116194,101113262,100135687,101109113,101114883,101107891,100820740,100135699,101115361,10110…
GO:0030176	integral to endoplasmic reticulum membrane	cellular_component	0.11297	1	4	702	60	20361	1.01114e+35
GO:0031227	intrinsic to endoplasmic reticulum membrane	cellular_component	0.11297	1	4	702	60	20361	1.01115e+35
GO:0007338	single fertilization	biological_process	0.11305	1	3	702	28	20361	1.01114e+26
GO:0009566	fertilization	biological_process	0.11305	1	3	702	28	20361	1.01102e+26
GO:0042176	regulation of protein catabolic process	biological_process	0.11317	1	1	702	4	20361	101106341
GO:0003896	DNA primase activity	molecular_function	0.11339	1	3	702	29	20361	1.01106e+26
GO:0030259	lipid glycosylation	biological_process	0.1156	1	1	702	2	20361	101110667
GO:0043044	ATP-dependent chromatin remodeling	biological_process	0.11566	1	2	702	14	20361	1.01115e+17
GO:0004857	enzyme inhibitor activity	molecular_function	0.11631	1	13	702	253	20361	1.01111e+116
GO:0032978	protein insertion into membrane from inner side	biological_process	0.11681	1	1	702	4	20361	101108178
GO:0032979	protein insertion into mitochondrial membrane from inner side	biological_process	0.11681	1	1	702	4	20361	101108178
GO:0051204	protein insertion into mitochondrial membrane	biological_process	0.11681	1	1	702	4	20361	101108178
GO:0004064	arylesterase activity	molecular_function	0.1177	1	2	702	11	20361	1.01114e+17
GO:0072348	sulfur compound transport	biological_process	0.11809	1	2	702	14	20361	1.01114e+17
GO:0016877	ligase activity, forming carbon-sulfur bonds	molecular_function	0.11885	1	1	702	3	20361	101104100
GO:0016878	acid-thiol ligase activity	molecular_function	0.11885	1	1	702	3	20361	101104100
GO:0015698	inorganic anion transport	biological_process	0.12067	1	5	702	66	20361	1.01119e+44
GO:0033645	host cell endomembrane system	cellular_component	0.12068	1	1	702	4	20361	105612572
GO:0033655	host cell cytoplasm part	cellular_component	0.12068	1	1	702	4	20361	105612572
GO:0044165	host cell endoplasmic reticulum	cellular_component	0.12068	1	1	702	4	20361	105612572
GO:0044167	host cell endoplasmic reticulum membrane	cellular_component	0.12068	1	1	702	4	20361	105612572
GO:0044385	integral to membrane of host cell	cellular_component	0.12068	1	1	702	4	20361	105612572
GO:0044386	integral to host endoplasmic reticulum membrane	cellular_component	0.12068	1	1	702	4	20361	105612572
GO:0004715	non-membrane spanning protein tyrosine kinase activity	molecular_function	0.12163	1	1	702	3	20361	101103590
GO:0030682	evasion or tolerance of host defense response	biological_process	0.12221	1	2	702	16	20361	1.01103e+17
GO:0051807	evasion or tolerance of defense response of other organism involved in symbiotic interaction	biological_process	0.12221	1	2	702	16	20361	1.05613e+17
GO:0007166	cell surface receptor signaling pathway	biological_process	0.12328	1	54	702	2211	20361	101119515,101111884,101114434,101120453,101114869,101114854,101104488,101115539,101102897,101121309,101123633,101118356,101113787,101104560,101114912,101108320,101113487,101106544,101105655,101117047,101104424,101115877,101116876,101113240,101107660,101113806,101104175,101121647,101121279,101112233,101109996,101107789,101119989,101118762,101110298,101111639,101109245,443189,100147707,101114927,10…
GO:0005732	small nucleolar ribonucleoprotein complex	cellular_component	0.12555	1	2	702	22	20361	1.0112e+17
GO:0004190	aspartic-type endopeptidase activity	molecular_function	0.12648	1	8	702	169	20361	4.43379e+65
GO:0070001	aspartic-type peptidase activity	molecular_function	0.12648	1	8	702	169	20361	1.01106e+65
GO:0004340	glucokinase activity	molecular_function	0.12695	1	1	702	2	20361	101115891
GO:0004396	hexokinase activity	molecular_function	0.12695	1	1	702	2	20361	101115891
GO:0051156	glucose 6-phosphate metabolic process	biological_process	0.12695	1	1	702	2	20361	101115891
GO:0000014	single-stranded DNA specific endodeoxyribonuclease activity	molecular_function	0.12854	1	1	702	4	20361	101106170
GO:0004883	glucocorticoid receptor activity	molecular_function	0.12856	1	1	702	2	20361	443412
GO:0031958	corticosteroid receptor signaling pathway	biological_process	0.12856	1	1	702	2	20361	443412
GO:0031960	response to corticosteroid stimulus	biological_process	0.12856	1	1	702	2	20361	443412
GO:0042921	glucocorticoid receptor signaling pathway	biological_process	0.12856	1	1	702	2	20361	443412
GO:0043402	glucocorticoid mediated signaling pathway	biological_process	0.12856	1	1	702	2	20361	443412
GO:0051384	response to glucocorticoid stimulus	biological_process	0.12856	1	1	702	2	20361	443412
GO:0071384	cellular response to corticosteroid stimulus	biological_process	0.12856	1	1	702	2	20361	443412
GO:0071385	cellular response to glucocorticoid stimulus	biological_process	0.12856	1	1	702	2	20361	443412
GO:0003689	DNA clamp loader activity	molecular_function	0.12858	1	1	702	2	20361	101106341
GO:0005657	replication fork	cellular_component	0.12858	1	1	702	2	20361	101106341
GO:0005663	DNA replication factor C complex	cellular_component	0.12858	1	1	702	2	20361	101106341
GO:0033170	protein-DNA loading ATPase activity	molecular_function	0.12858	1	1	702	2	20361	101106341
GO:0019030	icosahedral viral capsid	cellular_component	0.12858	1	1	702	2	20361	101117891
GO:0030554	adenyl nucleotide binding	molecular_function	0.13111	1	81	702	1727	20361	101102402,101104227,101114291,101105030,101107425,101116625,101104118,101118097,101104309,101104486,101108844,101102513,101119199,101110391,105605801,101119067,101108264,101106113,101107438,101106341,101104247,101119512,101106781,101119632,105616317,101118863,101107789,101108762,101106986,101115254,101105428,101107295,101102074,101122941,101115582,101107106,101120982,101111867,101116201,101102395…
GO:0005730	nucleolus	cellular_component	0.13142	1	2	702	22	20361	1.0112e+17
GO:0032559	adenyl ribonucleotide binding	molecular_function	0.13342	1	80	702	1698	20361	101108844,101119199,101102513,101110391,105605801,101119067,101108264,101106113,101107438,101106341,101104247,101119512,101106781,101102402,101104227,101114291,101107425,101105030,101116625,101104309,101118097,101104486,101122941,101115582,101107106,101120982,101111867,101116201,101102395,101119632,101118863,105616317,101108762,101107789,101106986,101115254,101105428,101107295,101102074,101102311…
GO:0006817	phosphate ion transport	biological_process	0.13346	1	2	702	17	20361	1.01106e+17
GO:0015321	sodium-dependent phosphate transmembrane transporter activity	molecular_function	0.13347	1	1	702	4	20361	101106170
GO:0044341	sodium-dependent phosphate transport	biological_process	0.13347	1	1	702	4	20361	101106170
GO:0009279	cell outer membrane	cellular_component	0.13402	1	2	702	15	20361	1.0112e+17
GO:0002694	regulation of leukocyte activation	biological_process	0.13413	1	1	702	5	20361	101118500
GO:0050865	regulation of cell activation	biological_process	0.13413	1	1	702	5	20361	101118500
GO:0051249	regulation of lymphocyte activation	biological_process	0.13413	1	1	702	5	20361	101118500
GO:0043038	amino acid activation	biological_process	0.13458	1	6	702	92	20361	1.01119e+53
GO:0043039	tRNA aminoacylation	biological_process	0.13458	1	6	702	92	20361	1.01104e+53
GO:0071944	cell periphery	cellular_component	0.13505	1	27	702	587	20361	101108973,101120976,101114909,105604107,101101902,101121279,101106620,101114927,101111390,780473,101122835,101107646,101115611,101120429,101110391,101108256,101115356,101122401,101113427,101104244,101106127,101121946,101114643,101112165,101113270,101119694,101103126
GO:0022804	active transmembrane transporter activity	molecular_function	0.13506	1	14	702	241	20361	1.01116e+125
GO:0046677	response to antibiotic	biological_process	0.1359	1	2	702	16	20361	1.01112e+17
GO:0016758	transferase activity, transferring hexosyl groups	molecular_function	0.13804	1	12	702	226	20361	1.01115e+104
GO:0008284	positive regulation of cell proliferation	biological_process	0.13833	1	3	702	33	20361	1.01118e+26
GO:0002218	activation of innate immune response	biological_process	0.1385	1	1	702	3	20361	101107646
GO:0031349	positive regulation of defense response	biological_process	0.1385	1	1	702	3	20361	101107646
GO:0032479	regulation of type I interferon production	biological_process	0.1385	1	1	702	3	20361	101107646
GO:0032481	positive regulation of type I interferon production	biological_process	0.1385	1	1	702	3	20361	101107646
GO:0032606	type I interferon production	biological_process	0.1385	1	1	702	3	20361	101107646
GO:0045089	positive regulation of innate immune response	biological_process	0.1385	1	1	702	3	20361	101107646
GO:0007532	regulation of mating-type specific transcription, DNA-dependent	biological_process	0.13865	1	1	702	4	20361	101106329
GO:0008301	DNA binding, bending	molecular_function	0.13865	1	1	702	4	20361	101106329
GO:0045895	positive regulation of mating-type specific transcription, DNA-dependent	biological_process	0.13865	1	1	702	4	20361	101106329
GO:0042025	host cell nucleus	cellular_component	0.13867	1	6	702	94	20361	1.01107e+53
GO:0008527	taste receptor activity	molecular_function	0.13875	1	1	702	4	20361	101119227
GO:0009593	detection of chemical stimulus	biological_process	0.13875	1	1	702	4	20361	101119227
GO:0050906	detection of stimulus involved in sensory perception	biological_process	0.13875	1	1	702	4	20361	101119227
GO:0050907	detection of chemical stimulus involved in sensory perception	biological_process	0.13875	1	1	702	4	20361	101119227
GO:0050912	detection of chemical stimulus involved in sensory perception of taste	biological_process	0.13875	1	1	702	4	20361	101119227
GO:0016247	channel regulator activity	molecular_function	0.13893	1	9	702	148	20361	1.01119e+80
GO:0016715	oxidoreductase activity, acting on paired donors, with incorporation or reduction of molecular oxygen, reduced ascorbate as one donor, and incorporation of one atom of oxygen	molecular_function	0.13939	1	1	702	3	20361	101112815
GO:0019354	siroheme biosynthetic process	biological_process	0.13952	1	2	702	15	20361	1.01118e+17
GO:0043115	precorrin-2 dehydrogenase activity	molecular_function	0.13952	1	2	702	15	20361	1.01118e+17
GO:0046156	siroheme metabolic process	biological_process	0.13952	1	2	702	15	20361	1.01122e+17
GO:0005088	Ras guanyl-nucleotide exchange factor activity	molecular_function	0.1397	1	7	702	81	20361	1.0111e+62
GO:0005089	Rho guanyl-nucleotide exchange factor activity	molecular_function	0.1397	1	7	702	81	20361	1.0111e+62
GO:0016437	tRNA cytidylyltransferase activity	molecular_function	0.14024	1	1	702	4	20361	101114240
GO:0006796	phosphate-containing compound metabolic process	biological_process	0.14159	1	61	702	1287	20361	101107438,101113270,105606759,101103590,101102513,101110391,101121483,101102311,101122401,101114682,101104881,101107646,101104156,101119067,101102003,101119972,101120630,101114883,101107709,101118975,101117299,101110314,101118505,101102402,101104227,101113261,443513,101114291,101115612,101105030,101112408,101107425,101103126,101115273,101120982,101103425,101115891,443274,101107106,101102157,10110…
GO:0004113	2',3'-cyclic-nucleotide 3'-phosphodiesterase activity	molecular_function	0.14161	1	1	702	3	20361	101102003
GO:0044249	cellular biosynthetic process	biological_process	0.14246	1	156	702	4365	20361	101114771,101120495,101113270,101122401,101113487,101104912,101111828,101123504,101104544,101121788,101110051,101104434,101105233,101110276,101121532,101112408,443412,101121782,101115490,100217409,100653388,100137069,101115273,101101895,101116716,101105239,101105618,101115163,101111386,101105645,101109289,101101949,101109405,101115695,101108379,101114392,101118475,101112580,101117106,101111501,10…
GO:0043565	sequence-specific DNA binding	molecular_function	0.1437	1	24	702	520	20361	1.0111e+206
GO:0015144	carbohydrate transmembrane transporter activity	molecular_function	0.14398	1	3	702	40	20361	1.01109e+26
GO:1901476	carbohydrate transporter activity	molecular_function	0.14398	1	3	702	40	20361	1.0111e+26
GO:0009379	Holliday junction helicase complex	cellular_component	0.14498	1	1	702	4	20361	101115254
GO:0048476	Holliday junction resolvase complex	cellular_component	0.14498	1	1	702	4	20361	101115254
GO:0005085	guanyl-nucleotide exchange factor activity	molecular_function	0.14572	1	10	702	134	20361	1.01117e+89
GO:0004332	fructose-bisphosphate aldolase activity	molecular_function	0.14758	1	1	702	5	20361	443440
GO:0006952	defense response	biological_process	0.14772	1	17	702	376	20361	1.01109e+152
GO:0016311	dephosphorylation	biological_process	0.14884	1	9	702	139	20361	1.0112e+77
GO:0007126	meiosis	biological_process	0.1498	1	3	702	34	20361	1.01106e+26
GO:0070469	respiratory chain	cellular_component	0.15022	1	4	702	56	20361	1.01112e+35
GO:0051049	regulation of transport	biological_process	0.15051	1	4	702	42	20361	1.01115e+35
GO:0000278	mitotic cell cycle	biological_process	0.15068	1	7	702	142	20361	1.01109e+62
GO:0018149	peptide cross-linking	biological_process	0.15075	1	2	702	17	20361	1.01105e+17
GO:0045261	proton-transporting ATP synthase complex, catalytic core F(1)	cellular_component	0.15088	1	2	702	18	20361	1.01104e+17
GO:0033643	host cell part	cellular_component	0.15173	1	8	702	135	20361	1.01113e+71
GO:0007096	regulation of exit from mitosis	biological_process	0.15188	1	1	702	4	20361	101115833
GO:0010458	exit from mitosis	biological_process	0.15188	1	1	702	4	20361	101115833
GO:0015721	bile acid and bile salt transport	biological_process	0.15265	1	1	702	6	20361	101112165
GO:0046982	protein heterodimerization activity	molecular_function	0.15265	1	1	702	6	20361	101112165
GO:0006625	protein targeting to peroxisome	biological_process	0.15412	1	1	702	5	20361	101109149
GO:0043574	peroxisomal transport	biological_process	0.15412	1	1	702	5	20361	101109149
GO:0072662	protein localization to peroxisome	biological_process	0.15412	1	1	702	5	20361	101109149
GO:0072663	establishment of protein localization to peroxisome	biological_process	0.15412	1	1	702	5	20361	101109149
GO:0005834	heterotrimeric G-protein complex	cellular_component	0.15547	1	2	702	18	20361	1.01121e+17
GO:0009898	internal side of plasma membrane	cellular_component	0.15547	1	2	702	18	20361	1.01115e+17
GO:0019897	extrinsic to plasma membrane	cellular_component	0.15547	1	2	702	18	20361	1.01115e+17
GO:0031234	extrinsic to internal side of plasma membrane	cellular_component	0.15547	1	2	702	18	20361	1.01121e+17
GO:0006895	Golgi to endosome transport	biological_process	0.1569	1	1	702	5	20361	101119564
GO:0006903	vesicle targeting	biological_process	0.1569	1	1	702	5	20361	101119564
GO:0007162	negative regulation of cell adhesion	biological_process	0.1569	1	1	702	5	20361	101119564
GO:0010721	negative regulation of cell development	biological_process	0.1569	1	1	702	5	20361	101119564
GO:0010769	regulation of cell morphogenesis involved in differentiation	biological_process	0.1569	1	1	702	5	20361	101119564
GO:0010771	negative regulation of cell morphogenesis involved in differentiation	biological_process	0.1569	1	1	702	5	20361	101119564
GO:0010810	regulation of cell-substrate adhesion	biological_process	0.1569	1	1	702	5	20361	101119564
GO:0010812	negative regulation of cell-substrate adhesion	biological_process	0.1569	1	1	702	5	20361	101119564
GO:0034315	regulation of Arp2/3 complex-mediated actin nucleation	biological_process	0.1569	1	1	702	5	20361	101119564
GO:0034446	substrate adhesion-dependent cell spreading	biological_process	0.1569	1	1	702	5	20361	101119564
GO:0035650	AP-1 adaptor complex binding	molecular_function	0.1569	1	1	702	5	20361	101119564
GO:0045596	negative regulation of cell differentiation	biological_process	0.1569	1	1	702	5	20361	101119564
GO:0048199	vesicle targeting, to, from or within Golgi	biological_process	0.1569	1	1	702	5	20361	101119564
GO:0048203	vesicle targeting, trans-Golgi to endosome	biological_process	0.1569	1	1	702	5	20361	101119564
GO:0051093	negative regulation of developmental process	biological_process	0.1569	1	1	702	5	20361	101119564
GO:0051125	regulation of actin nucleation	biological_process	0.1569	1	1	702	5	20361	101119564
GO:0060284	regulation of cell development	biological_process	0.1569	1	1	702	5	20361	101119564
GO:1900024	regulation of substrate adhesion-dependent cell spreading	biological_process	0.1569	1	1	702	5	20361	101119564
GO:1900025	negative regulation of substrate adhesion-dependent cell spreading	biological_process	0.1569	1	1	702	5	20361	101119564
GO:0019887	protein kinase regulator activity	molecular_function	0.15694	1	3	702	42	20361	1.01119e+26
GO:0042168	heme metabolic process	biological_process	0.15744	1	3	702	33	20361	1.01119e+26
GO:0005488	binding	molecular_function	0.15751	1	443	702	11924	20361	106990980,101106113,101113454,101107483,101104902,101106341,101107438,101123183,101120395,105605519,101112525,101108247,100169936,101108584,101117299,101104118,101117901,101114267,101104458,101108178,101114291,443513,101117137,105615370,101102205,101120845,101120651,105611834,101108667,101119564,101122281,101108732,101113223,101120982,101107106,101104285,101108654,101108256,101116194,101116956,10…
GO:0016773	phosphotransferase activity, alcohol group as acceptor	molecular_function	0.15783	1	46	702	914	20361	101111867,101116201,101115273,101102157,101103425,101120982,101115891,101112636,101107106,101119015,101115582,101112460,101122150,101122941,101105428,443010,101119989,101107789,101118973,105616317,101109149,101106631,101103590,105606759,101107438,101109931,101113739,101119067,101114878,101110391,101102513,101102311,101104881,101108320,101107709,101110314,101120630,101116538,101114291,101101994,10…
GO:0006820	anion transport	biological_process	0.15792	1	10	702	198	20361	1.01109e+89
GO:0019865	immunoglobulin binding	molecular_function	0.15922	1	1	702	4	20361	101112579
GO:0035556	intracellular signal transduction	biological_process	0.15946	1	38	702	800	20361	101113270,101107438,101113454,101113487,101108320,101122401,101110314,101117299,101104309,101101998,101120630,100147794,101104973,101114291,101108467,101107891,101105233,101108667,101119694,101109979,101122281,101107476,101109289,101110972,101107985,101116194,101102074,101109946,101111278,101103746,101105642,101116641,101118166,101111683,101110030,101103984,101106340,101121279
GO:0033057	multicellular organismal reproductive behavior	biological_process	0.15954	1	2	702	17	20361	443053443189
GO:0044706	multi-multicellular organism process	biological_process	0.15954	1	2	702	17	20361	443053443189
GO:0045297	post-mating behavior	biological_process	0.15954	1	2	702	17	20361	443189443053
GO:0045924	regulation of female receptivity	biological_process	0.15954	1	2	702	17	20361	443053443189
GO:0046008	regulation of female receptivity, post-mating	biological_process	0.15954	1	2	702	17	20361	443053443189
GO:0060180	female mating behavior	biological_process	0.15954	1	2	702	17	20361	443189443053
GO:0005801	cis-Golgi network	cellular_component	0.16036	1	3	702	38	20361	1.05606e+26
GO:0048013	ephrin receptor signaling pathway	biological_process	0.16185	1	2	702	14	20361	1.01116e+17
GO:0042127	regulation of cell proliferation	biological_process	0.16323	1	3	702	36	20361	1.01113e+26
GO:0006793	phosphorus metabolic process	biological_process	0.16326	1	61	702	1299	20361	101107438,101113270,105606759,101103590,101104881,101114682,101102513,101102311,101110391,101121483,101122401,101119067,101107646,101104156,101120630,101102003,101119972,101117299,101110314,101114883,101107709,101118975,101104227,101113261,101118505,101102402,101115612,101112408,101105030,101107425,443513,101114291,101103425,101120982,443274,101115891,101107106,101102157,101115273,101103126,10111…
GO:0005126	cytokine receptor binding	molecular_function	0.16377	1	6	702	148	20361	4.43056e+50
GO:0008073	ornithine decarboxylase inhibitor activity	molecular_function	0.16386	1	1	702	7	20361	101111386
GO:0042979	ornithine decarboxylase regulator activity	molecular_function	0.16386	1	1	702	7	20361	101111386
GO:0043900	regulation of multi-organism process	biological_process	0.16434	1	2	702	22	20361	1.01115e+17
GO:1901576	organic substance biosynthetic process	biological_process	0.16571	1	158	702	4447	20361	101104544,101104434,101110051,101121788,101111828,101123504,101105233,101121532,101110276,101121782,101115490,100217409,100653388,443412,101112408,101120495,101114771,101113270,101122401,101104912,101113487,101101949,101109405,101108379,101115695,101112580,101114392,101118475,101117106,101111501,101115273,101101895,100137069,101105618,101115163,101106889,101116716,101105239,101111386,101109289,10…
GO:0005829	cytosol	cellular_component	0.16582	1	5	702	94	20361	1.01116e+44
GO:0006468	protein phosphorylation	biological_process	0.16594	1	33	702	617	20361	101105030,101107425,101115612,101114291,101113261,101104227,101102402,101110314,101107709,101120630,101119067,101104881,101102311,101110391,101102513,101103590,105606759,101107438,101118973,101119989,105616317,101105428,443010,101115582,101122941,101116201,101111867,101102973,101102157,101120982,101103425,101107106,101115273
GO:0030001	metal ion transport	biological_process	0.16651	1	24	702	504	20361	1.01104e+212
GO:0016887	ATPase activity	molecular_function	0.16668	1	22	702	432	20361	1.00148e+197
GO:0008033	tRNA processing	biological_process	0.16725	1	9	702	161	20361	1.01122e+80
GO:0018995	host	cellular_component	0.16752	1	8	702	139	20361	1.01118e+71
GO:0043245	extraorganismal space	cellular_component	0.16752	1	8	702	139	20361	1.01103e+71
GO:0043657	host cell	cellular_component	0.16752	1	8	702	139	20361	1.01108e+71
GO:0044215	other organism	cellular_component	0.16752	1	8	702	139	20361	1.01108e+71
GO:0044216	other organism cell	cellular_component	0.16752	1	8	702	139	20361	1.01108e+71
GO:0044217	other organism part	cellular_component	0.16752	1	8	702	139	20361	1.01118e+71
GO:0017070	U6 snRNA binding	molecular_function	0.16766	1	1	702	3	20361	101111507
GO:0016705	oxidoreductase activity, acting on paired donors, with incorporation or reduction of molecular oxygen	molecular_function	0.16833	1	12	702	217	20361	1.01105e+104
GO:0017080	sodium channel regulator activity	molecular_function	0.16906	1	3	702	38	20361	1.01107e+26
GO:0019871	sodium channel inhibitor activity	molecular_function	0.16906	1	3	702	38	20361	1.01107e+26
GO:0016740	transferase activity	molecular_function	0.16986	1	114	702	2738	20361	100135687,101120630,101102693,101104544,101107709,101111372,101110314,101109113,101110276,101107891,101104100,101101994,101116538,101115612,442993,101113270,105606759,101102623,101103590,101102311,101114878,101104199,101108320,101104881,101112759,101114682,101113739,443010,101109405,101110535,100534644,101102681,101108650,101115695,101109663,101109149,101106812,101112580,101120031,101102610,10110…
GO:0005133	interferon-gamma receptor binding	molecular_function	0.17281	1	1	702	4	20361	101113126
GO:0000079	regulation of cyclin-dependent protein serine/threonine kinase activity	biological_process	0.17408	1	1	702	5	20361	101102973
GO:0071900	regulation of protein serine/threonine kinase activity	biological_process	0.17408	1	1	702	5	20361	101102973
GO:0002161	aminoacyl-tRNA editing activity	molecular_function	0.1756	1	1	702	6	20361	101119512
GO:0008200	ion channel inhibitor activity	molecular_function	0.1763	1	8	702	136	20361	1.01107e+71
GO:0016248	channel inhibitor activity	molecular_function	0.1763	1	8	702	136	20361	1.01107e+71
GO:0016568	chromatin modification	biological_process	0.17764	1	5	702	71	20361	1.01115e+44
GO:0030430	host cell cytoplasm	cellular_component	0.17806	1	2	702	21	20361	1.01118e+17
GO:0016757	transferase activity, transferring glycosyl groups	molecular_function	0.17922	1	18	702	375	20361	1.00535e+158
GO:0034470	ncRNA processing	biological_process	0.18092	1	12	702	244	20361	1.01119e+104
GO:0044380	protein localization to cytoskeleton	biological_process	0.18235	1	2	702	17	20361	1.01115e+17
GO:0071988	protein localization to spindle pole body	biological_process	0.18235	1	2	702	17	20361	1.01115e+17
GO:0044260	cellular macromolecule metabolic process	biological_process	0.18253	1	213	702	5916	20361	101119906,101111845,101116328,101105428,105605100,101102074,101115254,101119298,101103795,101107789,101121620,105616317,101109515,101113223,101108732,101122281,100642179,101119564,101120982,101122655,101107106,101122606,101122913,101111299,101116194,101108256,101113262,101104131,101107989,101119170,101114511,101104118,101117901,105615177,101120976,443513,101114291,101102402,101113261,101104902,10…
GO:0022890	inorganic cation transmembrane transporter activity	molecular_function	0.18291	1	32	702	733	20361	101120031,101111639,101106340,101114431,101108183,101120429,101116194,101122358,101109979,101118500,101119694,101103126,101108667,101105618,100125358,101112056,101107891,101105356,101108467,101101902,101118505,101115361,101116928,101113095,443488,101105473,101115356,101123469,101120605,101104156,101113487,101115623
GO:0006771	riboflavin metabolic process	biological_process	0.18315	1	1	702	6	20361	101113687
GO:0009231	riboflavin biosynthetic process	biological_process	0.18315	1	1	702	6	20361	101113687
GO:0042726	flavin-containing compound metabolic process	biological_process	0.18315	1	1	702	6	20361	101113687
GO:0042727	flavin-containing compound biosynthetic process	biological_process	0.18315	1	1	702	6	20361	101113687
GO:0000981	sequence-specific DNA binding RNA polymerase II transcription factor activity	molecular_function	0.18319	1	2	702	21	20361	1.01107e+17
GO:0015103	inorganic anion transmembrane transporter activity	molecular_function	0.18419	1	3	702	37	20361	1.01114e+26
GO:0009439	cyanate metabolic process	biological_process	0.1842	1	1	702	5	20361	101113635
GO:0004601	peroxidase activity	molecular_function	0.18454	1	2	702	24	20361	1.01113e+17
GO:0016684	oxidoreductase activity, acting on peroxide as acceptor	molecular_function	0.18454	1	2	702	24	20361	1.01113e+17
GO:0033202	DNA helicase complex	cellular_component	0.18456	1	1	702	7	20361	101115254
GO:0005186	pheromone activity	molecular_function	0.18492	1	2	702	18	20361	443412101102729
GO:0006359	regulation of transcription from RNA polymerase III promoter	biological_process	0.18516	1	2	702	21	20361	1.01123e+17
GO:0040013	negative regulation of locomotion	biological_process	0.18665	1	1	702	7	20361	101119564
GO:0051271	negative regulation of cellular component movement	biological_process	0.18665	1	1	702	7	20361	101119564
GO:2000146	negative regulation of cell motility	biological_process	0.18665	1	1	702	7	20361	101119564
GO:0042151	nematocyst	cellular_component	0.18743	1	2	702	21	20361	1.01116e+17
GO:0008283	cell proliferation	biological_process	0.18811	1	3	702	41	20361	1.01118e+26
GO:0008107	galactoside 2-alpha-L-fucosyltransferase activity	molecular_function	0.18822	1	1	702	6	20361	101116804
GO:0031127	alpha-(1,2)-fucosyltransferase activity	molecular_function	0.18822	1	1	702	6	20361	101116804
GO:0018189	pyrroloquinoline quinone biosynthetic process	biological_process	0.18833	1	1	702	4	20361	101107196
GO:0018212	peptidyl-tyrosine modification	biological_process	0.18833	1	1	702	4	20361	101107196
GO:0010646	regulation of cell communication	biological_process	0.18842	1	14	702	239	20361	1.01113e+125
GO:0022402	cell cycle process	biological_process	0.18871	1	15	702	339	20361	1.01122e+134
GO:0051704	multi-organism process	biological_process	0.18948	1	52	702	1257	20361	101115611,101117084,101105473,101119199,101110470,101114878,443053,101122835,101111919,105612572,101123125,101120756,101109732,101102623,101115623,101108973,101111717,101117137,101112408,101115785,101115490,101102729,101118097,101103069,101120904,101111372,101111828,101102897,101104486,101117891,101111386,101102538,101104535,101120726,101120749,101112880,101115641,101105057,101118500,101119442,10…
GO:0023051	regulation of signaling	biological_process	0.18968	1	14	702	240	20361	1.01105e+125
GO:0005740	mitochondrial envelope	cellular_component	0.19042	1	12	702	280	20361	1.00125e+107
GO:0005524	ATP binding	molecular_function	0.19067	1	78	702	1695	20361	101122941,101115582,101120982,101107106,101116201,101111867,105616317,101118863,101119632,101106986,101108762,101107789,101115254,101102074,101107295,101105428,101102513,101108844,101119199,101110391,101108264,101119067,105605801,101106341,101107438,101106113,101106781,101104247,101119512,101104227,101102402,101107425,101105030,101114291,101104309,101118097,101116625,101104486,101118531,101122150…
GO:0042278	purine nucleoside metabolic process	biological_process	0.19079	1	8	702	160	20361	4.43274e+68
GO:0046128	purine ribonucleoside metabolic process	biological_process	0.19079	1	8	702	160	20361	1.01104e+68
GO:0005615	extracellular space	cellular_component	0.1914	1	10	702	200	20361	1.01107e+89
GO:0030515	snoRNA binding	molecular_function	0.1922	1	1	702	8	20361	101108732
GO:0072588	box H/ACA RNP complex	cellular_component	0.1922	1	1	702	8	20361	101108732
GO:0019199	transmembrane receptor protein kinase activity	molecular_function	0.1925	1	4	702	59	20361	1.01112e+35
GO:0010883	regulation of lipid storage	biological_process	0.19271	1	2	702	21	20361	1.01118e+17
GO:0010884	positive regulation of lipid storage	biological_process	0.19271	1	2	702	21	20361	1.01121e+17
GO:0071949	FAD binding	molecular_function	0.19355	1	3	702	33	20361	1.01119e+26
GO:0000724	double-strand break repair via homologous recombination	biological_process	0.19669	1	1	702	4	20361	101109980
GO:0007271	synaptic transmission, cholinergic	biological_process	0.19698	1	1	702	4	20361	101120756
GO:0030431	sleep	biological_process	0.19698	1	1	702	4	20361	101120756
GO:0032222	regulation of synaptic transmission, cholinergic	biological_process	0.19698	1	1	702	4	20361	101120756
GO:0034235	GPI anchor binding	molecular_function	0.19698	1	1	702	4	20361	101120756
GO:0006784	heme a biosynthetic process	biological_process	0.19829	1	1	702	5	20361	101118837
GO:0046160	heme a metabolic process	biological_process	0.19829	1	1	702	5	20361	101118837
GO:0009214	cyclic nucleotide catabolic process	biological_process	0.19871	1	1	702	4	20361	101102003
GO:0046914	transition metal ion binding	molecular_function	0.20001	1	80	702	2042	20361	101111386,101114233,101118531,101104181,101117684,101117793,101104040,101112864,101115163,101120031,101121880,100169935,101103929,101109713,101115695,101111593,101112322,101108650,101114682,768095,101105027,101118949,101111953,101109559,101113586,101103679,101113270,101117026,101107891,101102739,101118505,101105233,443412,100653388,101117488,101101994,105613870,101102729,101120609,101109113,10111…
GO:0005739	mitochondrion	cellular_component	0.20029	1	18	702	431	20361	1.01103e+161
GO:0019236	response to pheromone	biological_process	0.20097	1	1	702	6	20361	101115253
GO:0051056	regulation of small GTPase mediated signal transduction	biological_process	0.20178	1	8	702	104	20361	1.0111e+71
GO:0044462	external encapsulating structure part	cellular_component	0.20196	1	2	702	20	20361	1.01121e+17
GO:0008773	[protein-PII] uridylyltransferase activity	molecular_function	0.20275	1	1	702	4	20361	101112759
GO:0031966	mitochondrial membrane	cellular_component	0.2036	1	11	702	251	20361	1.00125e+98
GO:0007006	mitochondrial membrane organization	biological_process	0.20386	1	1	702	7	20361	101108178
GO:0000070	mitotic sister chromatid segregation	biological_process	0.20397	1	1	702	6	20361	101112636
GO:0000796	condensin complex	cellular_component	0.20397	1	1	702	6	20361	101112636
GO:0000819	sister chromatid segregation	biological_process	0.20397	1	1	702	6	20361	101112636
GO:0007076	mitotic chromosome condensation	biological_process	0.20397	1	1	702	6	20361	101112636
GO:0003899	DNA-directed RNA polymerase activity	molecular_function	0.20481	1	10	702	215	20361	1.01117e+89
GO:0052126	movement in host environment	biological_process	0.20511	1	4	702	63	20361	1.01118e+35
GO:0052192	movement in environment of other organism involved in symbiotic interaction	biological_process	0.20511	1	4	702	63	20361	1.01119e+35
GO:0015114	phosphate ion transmembrane transporter activity	molecular_function	0.20606	1	1	702	6	20361	101106170
GO:0010167	response to nitrate	biological_process	0.2064	1	1	702	4	20361	101112408
GO:0015706	nitrate transport	biological_process	0.2064	1	1	702	4	20361	101112408
GO:0009968	negative regulation of signal transduction	biological_process	0.20663	1	2	702	24	20361	1.01124e+17
GO:0010648	negative regulation of cell communication	biological_process	0.20663	1	2	702	24	20361	1.01124e+17
GO:0023057	negative regulation of signaling	biological_process	0.20663	1	2	702	24	20361	1.01117e+17
GO:0002682	regulation of immune system process	biological_process	0.20727	1	3	702	51	20361	1.01119e+26
GO:0070567	cytidylyltransferase activity	molecular_function	0.20763	1	1	702	6	20361	101114240
GO:0005135	interleukin-3 receptor binding	molecular_function	0.20929	1	1	702	5	20361	101122496
GO:0033014	tetrapyrrole biosynthetic process	biological_process	0.21027	1	5	702	80	20361	1.01104e+44
GO:0051701	interaction with host	biological_process	0.21093	1	9	702	185	20361	1.01121e+80
GO:0072509	divalent inorganic cation transmembrane transporter activity	molecular_function	0.21461	1	8	702	168	20361	1.0111e+71
GO:0015077	monovalent inorganic cation transmembrane transporter activity	molecular_function	0.21478	1	24	702	527	20361	1.01116e+212
GO:0042451	purine nucleoside biosynthetic process	biological_process	0.21547	1	6	702	125	20361	1.01103e+53
GO:0046129	purine ribonucleoside biosynthetic process	biological_process	0.21547	1	6	702	125	20361	1.01103e+53
GO:0030177	positive regulation of Wnt receptor signaling pathway	biological_process	0.21612	1	1	702	5	20361	101107789
GO:0060070	canonical Wnt receptor signaling pathway	biological_process	0.21612	1	1	702	5	20361	101107789
GO:0060828	regulation of canonical Wnt receptor signaling pathway	biological_process	0.21612	1	1	702	5	20361	101107789
GO:0090263	positive regulation of canonical Wnt receptor signaling pathway	biological_process	0.21612	1	1	702	5	20361	101107789
GO:0004594	pantothenate kinase activity	molecular_function	0.21637	1	1	702	7	20361	101122150
GO:0050151	oleate hydratase activity	molecular_function	0.21672	1	1	702	6	20361	101118975
GO:0009636	response to toxic substance	biological_process	0.21771	1	3	702	36	20361	1.01112e+26
GO:0004672	protein kinase activity	molecular_function	0.21915	1	36	702	712	20361	101107709,101110314,101120630,101101994,101114291,101115612,101105030,101107425,101102402,101104227,101104100,101103590,101107438,105606759,101119067,101102311,101102513,101110391,101114878,101104881,101105428,443010,101119989,101118973,101106631,105616317,101111867,101116201,101115273,101103425,101120982,101107106,101102157,101119015,101115582,101122941
GO:0007049	cell cycle	biological_process	0.22051	1	22	702	523	20361	1.01106e+197
GO:0007617	mating behavior	biological_process	0.22054	1	2	702	21	20361	443189443053
GO:0019098	reproductive behavior	biological_process	0.22054	1	2	702	21	20361	443189443053
GO:0009877	nodulation	biological_process	0.22057	1	2	702	23	20361	1.01111e+17
GO:0009058	biosynthetic process	biological_process	0.22272	1	160	702	4556	20361	101106341,101110686,101107483,101104902,101104156,101107495,101117084,443068,101119170,101107989,101118097,101113687,105615177,101117901,101114511,443513,101120976,101102402,105611834,101109515,101122913,101122606,101122655,101122281,100642179,101113223,101104131,101108256,101116194,101113262,101102074,105605100,101111845,101116328,101113311,101103795,101115254,101119298,101121620,101107789,10110…
GO:0016875	ligase activity, forming carbon-oxygen bonds	molecular_function	0.22326	1	5	702	87	20361	1.01119e+44
GO:0016876	ligase activity, forming aminoacyl-tRNA and related compounds	molecular_function	0.22326	1	5	702	87	20361	1.01107e+44
GO:0030260	entry into host cell	biological_process	0.22339	1	3	702	43	20361	1.01119e+26
GO:0044409	entry into host	biological_process	0.22339	1	3	702	43	20361	1.01118e+26
GO:0046718	viral entry into host cell	biological_process	0.22339	1	3	702	43	20361	1.01119e+26
GO:0051806	entry into cell of other organism involved in symbiotic interaction	biological_process	0.22339	1	3	702	43	20361	1.01118e+26
GO:0051828	entry into other organism involved in symbiotic interaction	biological_process	0.22339	1	3	702	43	20361	1.01118e+26
GO:0070566	adenylyltransferase activity	molecular_function	0.22346	1	2	702	29	20361	1.01114e+17
GO:0042440	pigment metabolic process	biological_process	0.22425	1	5	702	77	20361	1.01119e+44
GO:0016628	oxidoreductase activity, acting on the CH-CH group of donors, NAD or NADP as acceptor	molecular_function	0.22561	1	3	702	40	20361	1.01118e+26
GO:0016485	protein processing	biological_process	0.22636	1	4	702	70	20361	1.01112e+35
GO:0051604	protein maturation	biological_process	0.22636	1	4	702	70	20361	1.01123e+35
GO:0007266	Rho protein signal transduction	biological_process	0.22903	1	6	702	75	20361	1.0111e+53
GO:0035023	regulation of Rho protein signal transduction	biological_process	0.22903	1	6	702	75	20361	1.0111e+53
GO:0007265	Ras protein signal transduction	biological_process	0.22908	1	7	702	92	20361	1.0111e+62
GO:0046578	regulation of Ras protein signal transduction	biological_process	0.22908	1	7	702	92	20361	1.0111e+62
GO:0009966	regulation of signal transduction	biological_process	0.23196	1	13	702	231	20361	1.01112e+116
GO:0019915	lipid storage	biological_process	0.23254	1	2	702	25	20361	1.01118e+17
GO:0004558	alpha-glucosidase activity	molecular_function	0.23282	1	1	702	6	20361	443440
GO:0004564	beta-fructofuranosidase activity	molecular_function	0.23282	1	1	702	6	20361	443440
GO:0004575	sucrose alpha-glucosidase activity	molecular_function	0.23282	1	1	702	6	20361	443440
GO:0015926	glucosidase activity	molecular_function	0.23282	1	1	702	6	20361	443440
GO:0019031	viral envelope	cellular_component	0.23367	1	12	702	265	20361	1.0111e+107
GO:0036338	viral membrane	cellular_component	0.23367	1	12	702	265	20361	1.01105e+107
GO:0016108	tetraterpenoid metabolic process	biological_process	0.23461	1	2	702	19	20361	1.01122e+17
GO:0016109	tetraterpenoid biosynthetic process	biological_process	0.23461	1	2	702	19	20361	1.01122e+17
GO:0016116	carotenoid metabolic process	biological_process	0.23461	1	2	702	19	20361	1.01122e+17
GO:0016117	carotenoid biosynthetic process	biological_process	0.23461	1	2	702	19	20361	1.01122e+17
GO:0031300	intrinsic to organelle membrane	cellular_component	0.2347	1	5	702	97	20361	1.01103e+44
GO:0031301	integral to organelle membrane	cellular_component	0.2347	1	5	702	97	20361	1.01103e+44
GO:0032553	ribonucleotide binding	molecular_function	0.23603	1	88	702	2039	20361	101115582,101122941,101116194,101116201,101121946,101102395,101111867,101107106,101120982,101106986,101111683,101108762,101107789,101118863,105616317,101119632,101102074,101107295,101105428,101115254,101108264,101119067,105605801,101110391,101102513,101108844,101119199,101106781,101104247,101119512,101106341,101120395,101107438,101106113,101105030,101107425,101114291,101104227,101102402,101104486…
GO:0003333	amino acid transmembrane transport	biological_process	0.23826	1	3	702	59	20361	1.01122e+26
GO:0042277	peptide binding	molecular_function	0.23859	1	1	702	12	20361	100217409
GO:0045088	regulation of innate immune response	biological_process	0.23875	1	1	702	8	20361	101107646
GO:0022414	reproductive process	biological_process	0.23899	1	9	702	184	20361	4.43189e+74
GO:0051234	establishment of localization	biological_process	0.2405	1	115	702	2845	20361	101115229,101116975,101107321,101104002,101122806,101118166,101119632,101106631,101117032,101121614,101108667,101122055,101121946,100642179,101122281,101103123,101119564,101122655,101122358,101111779,101116194,101101892,101120429,101106620,101113357,101113095,101119972,101108178,100913155,101102401,101111717,101103292,100125358,101105356,101108043,101102663,101109277,101104247,101106781,101123485…
GO:0016021	integral to membrane	cellular_component	0.2412	1	127	702	4128	20361	101120867,101110972,101122496,101123028,101109271,101108803,101113888,101120749,101115641,101115891,101119694,101118500,101109979,100170317,101116045,101103126,101104040,101116716,101107691,101110415,101109626,101114392,101109149,101120031,101101900,101110526,100233164,101114909,101108183,101103929,100147707,101109405,443189,101109494,101109535,101110938,101118816,101121399,101111593,101105524,10…
GO:0042626	ATPase activity, coupled to transmembrane movement of substances	molecular_function	0.24133	1	7	702	121	20361	1.01107e+62
GO:0043492	ATPase activity, coupled to movement of substances	molecular_function	0.24133	1	7	702	121	20361	1.01104e+62
GO:0005539	glycosaminoglycan binding	molecular_function	0.24193	1	3	702	38	20361	1.01107e+26
GO:0008138	protein tyrosine/serine/threonine phosphatase activity	molecular_function	0.24215	1	6	702	90	20361	1.01112e+53
GO:0072350	tricarboxylic acid metabolic process	biological_process	0.24232	1	1	702	5	20361	101107196
GO:0072351	tricarboxylic acid biosynthetic process	biological_process	0.24232	1	1	702	5	20361	101107196
GO:0009186	deoxyribonucleoside diphosphate metabolic process	biological_process	0.24284	1	1	702	5	20361	101107321
GO:0005887	integral to plasma membrane	cellular_component	0.24321	1	6	702	109	20361	1.0112e+53
GO:0031226	intrinsic to plasma membrane	cellular_component	0.24321	1	6	702	109	20361	1.01115e+53
GO:0046649	lymphocyte activation	biological_process	0.24325	1	1	702	11	20361	101118500
GO:0004357	glutamate-cysteine ligase activity	molecular_function	0.24363	1	1	702	6	20361	101114822
GO:0005506	iron ion binding	molecular_function	0.24394	1	9	702	224	20361	1.00568e+77
GO:0019902	phosphatase binding	molecular_function	0.24424	1	1	702	9	20361	101109918
GO:0005451	monovalent cation:hydrogen antiporter activity	molecular_function	0.24432	1	1	702	7	20361	101115623
GO:0015491	cation:cation antiporter activity	molecular_function	0.24432	1	1	702	7	20361	101115623
GO:0000041	transition metal ion transport	biological_process	0.24481	1	7	702	156	20361	1.0111e+62
GO:0005272	sodium channel activity	molecular_function	0.24513	1	3	702	39	20361	1.01103e+23
GO:0006801	superoxide metabolic process	biological_process	0.24539	1	1	702	8	20361	101104150
GO:0072593	reactive oxygen species metabolic process	biological_process	0.24539	1	1	702	8	20361	101104150
GO:0050497	transferase activity, transferring alkylthio groups	molecular_function	0.24584	1	1	702	9	20361	101104199
GO:0050524	coenzyme-B sulfoethylthiotransferase activity	molecular_function	0.24584	1	1	702	9	20361	101104199
GO:0008063	Toll signaling pathway	biological_process	0.24624	1	1	702	6	20361	101114854
GO:0005262	calcium channel activity	molecular_function	0.24668	1	3	702	51	20361	1.01121e+26
GO:0044723	single-organism carbohydrate metabolic process	biological_process	0.24761	1	15	702	331	20361	1.01115e+131
GO:0009119	ribonucleoside metabolic process	biological_process	0.24793	1	8	702	170	20361	1.01106e+68
GO:0009424	bacterial-type flagellum hook	cellular_component	0.24798	1	1	702	5	20361	101112662
GO:0003883	CTP synthase activity	molecular_function	0.248	1	1	702	5	20361	101103276
GO:0004140	dephospho-CoA kinase activity	molecular_function	0.24956	1	1	702	8	20361	101107789
GO:0009401	phosphoenolpyruvate-dependent sugar phosphotransferase system	biological_process	0.24984	1	2	702	25	20361	1.01109e+17
GO:0001882	nucleoside binding	molecular_function	0.25055	1	87	702	2020	20361	101107106,101120982,101116201,101102395,101111867,101122941,101116194,101115582,101115254,101105428,101107295,101102074,101119632,105616317,101118863,101111683,101106986,101107789,101108762,101120395,101107438,101106341,101106113,101106781,101104247,101119512,101108844,101102513,101110391,101119199,101119067,101108264,105605801,101104309,101118097,101116625,101104486,101104227,101102402,101107425…
GO:0044455	mitochondrial membrane part	cellular_component	0.25141	1	7	702	153	20361	1.01103e+62
GO:0045259	proton-transporting ATP synthase complex	cellular_component	0.25226	1	4	702	78	20361	1.01106e+35
GO:0033218	amide binding	molecular_function	0.2526	1	1	702	13	20361	100217409
GO:0010181	FMN binding	molecular_function	0.2527	1	2	702	26	20361	1.01122e+17
GO:0003972	RNA ligase (ATP) activity	molecular_function	0.25407	1	1	702	5	20361	101116625
GO:0030414	peptidase inhibitor activity	molecular_function	0.25438	1	8	702	165	20361	1.01112e+71
GO:0061134	peptidase regulator activity	molecular_function	0.25438	1	8	702	165	20361	1.01112e+71
GO:0000377	RNA splicing, via transesterification reactions with bulged adenosine as nucleophile	biological_process	0.25639	1	3	702	44	20361	4.43068e+23
GO:0000398	mRNA splicing, via spliceosome	biological_process	0.25639	1	3	702	44	20361	4.43068e+23
GO:0017069	snRNA binding	molecular_function	0.25695	1	1	702	7	20361	101111507
GO:0015171	amino acid transmembrane transporter activity	molecular_function	0.25747	1	3	702	60	20361	1.01113e+26
GO:0007618	mating	biological_process	0.25847	1	2	702	23	20361	443189443053
GO:0044703	multi-organism reproductive process	biological_process	0.25847	1	2	702	23	20361	443189443053
GO:0004129	cytochrome-c oxidase activity	molecular_function	0.25908	1	4	702	78	20361	1.01108e+35
GO:0016675	oxidoreductase activity, acting on a heme group of donors	molecular_function	0.25908	1	4	702	78	20361	1.01106e+35
GO:0016676	oxidoreductase activity, acting on a heme group of donors, oxygen as acceptor	molecular_function	0.25908	1	4	702	78	20361	1.01106e+35
GO:0004318	enoyl-[acyl-carrier-protein] reductase (NADH) activity	molecular_function	0.2595	1	1	702	5	20361	101117580
GO:0009150	purine ribonucleotide metabolic process	biological_process	0.26044	1	9	702	188	20361	1.01122e+77
GO:0001614	purinergic nucleotide receptor activity	molecular_function	0.26105	1	1	702	9	20361	101101902
GO:0004931	extracellular ATP-gated cation channel activity	molecular_function	0.26105	1	1	702	9	20361	101101902
GO:0010243	response to organonitrogen compound	biological_process	0.26105	1	1	702	9	20361	101101902
GO:0014074	response to purine-containing compound	biological_process	0.26105	1	1	702	9	20361	101101902
GO:0016502	nucleotide receptor activity	molecular_function	0.26105	1	1	702	9	20361	101101902
GO:0033198	response to ATP	biological_process	0.26105	1	1	702	9	20361	101101902
GO:0035381	ATP-gated ion channel activity	molecular_function	0.26105	1	1	702	9	20361	101101902
GO:0035586	purinergic receptor activity	molecular_function	0.26105	1	1	702	9	20361	101101902
GO:0046683	response to organophosphorus	biological_process	0.26105	1	1	702	9	20361	101101902
GO:0015204	urea transmembrane transporter activity	molecular_function	0.26149	1	1	702	6	20361	101103292
GO:0015840	urea transport	biological_process	0.26149	1	1	702	6	20361	101103292
GO:0019755	one-carbon compound transport	biological_process	0.26149	1	1	702	6	20361	101103292
GO:0042887	amide transmembrane transporter activity	molecular_function	0.26149	1	1	702	6	20361	101103292
GO:0071918	urea transmembrane transport	biological_process	0.26149	1	1	702	6	20361	101103292
GO:0007052	mitotic spindle organization	biological_process	0.2618	1	1	702	8	20361	101115253
GO:0007530	sex determination	biological_process	0.26187	1	1	702	7	20361	101106329
GO:0007531	mating type determination	biological_process	0.26187	1	1	702	7	20361	101106329
GO:0045165	cell fate commitment	biological_process	0.26187	1	1	702	7	20361	101106329
GO:0044163	host cytoskeleton	cellular_component	0.26253	1	1	702	8	20361	101118166
GO:0075519	microtubule-dependent intracellular transport of viral material	biological_process	0.26253	1	1	702	8	20361	101118166
GO:0075521	microtubule-dependent intracellular transport of viral material to nucleus	biological_process	0.26253	1	1	702	8	20361	101118166
GO:0075606	transport of viral material to nucleus	biological_process	0.26253	1	1	702	8	20361	101118166
GO:0075733	intracellular transport of viral material	biological_process	0.26253	1	1	702	8	20361	101118166
GO:0051606	detection of stimulus	biological_process	0.26268	1	1	702	9	20361	101119227
GO:0046849	bone remodeling	biological_process	0.2628	1	1	702	15	20361	106991784
GO:0048771	tissue remodeling	biological_process	0.2628	1	1	702	15	20361	106991784
GO:0031224	intrinsic to membrane	cellular_component	0.26288	1	127	702	4149	20361	101122806,100037702,101111639,101107321,101110298,101109996,101112233,101113668,101113274,101104135,101108204,101106623,101113628,101110673,101110208,101102538,101116194,101108256,101113427,100642179,101111717,101103292,101105356,101111884,101101902,101106620,101115539,101111390,101104488,101120257,101121239,101119972,100294558,105605801,101120605,101122922,101106544,443068,101119199,101104560,10…
GO:0009399	nitrogen fixation	biological_process	0.26291	1	1	702	9	20361	101112662
GO:0016310	phosphorylation	biological_process	0.26349	1	34	702	695	20361	105616317,101119989,101118973,443010,101105428,101122941,101115582,101115273,101102157,101103425,101120982,101107106,101111867,101102973,101116201,101102402,101113261,101104227,101114291,101107425,101105030,101115612,101120630,101107709,101114883,101110314,101102311,101110391,101102513,101104881,101119067,105606759,101107438,101103590
GO:0031975	envelope	cellular_component	0.26417	1	14	702	338	20361	1.00125e+125
GO:0019685	photosynthesis, dark reaction	biological_process	0.26455	1	1	702	6	20361	101103795
GO:0004810	tRNA adenylyltransferase activity	molecular_function	0.26459	1	1	702	7	20361	101114240
GO:0005157	macrophage colony-stimulating factor receptor binding	molecular_function	0.26483	1	1	702	6	20361	101113261
GO:0090544	BAF-type complex	cellular_component	0.26499	1	1	702	5	20361	101115263
GO:0051648	vesicle localization	biological_process	0.26534	1	1	702	7	20361	101119564
GO:0051650	establishment of vesicle localization	biological_process	0.26534	1	1	702	7	20361	101119564
GO:0001932	regulation of protein phosphorylation	biological_process	0.26543	1	2	702	21	20361	1.01103e+17
GO:0050792	regulation of viral process	biological_process	0.26556	1	1	702	11	20361	101115254
GO:0016832	aldehyde-lyase activity	molecular_function	0.26645	1	1	702	8	20361	443440
GO:0015016	[heparan sulfate]-glucosamine N-sulfotransferase activity	molecular_function	0.26684	1	1	702	6	20361	101112819
GO:0034483	heparan sulfate sulfotransferase activity	molecular_function	0.26684	1	1	702	6	20361	101112819
GO:0015078	hydrogen ion transmembrane transporter activity	molecular_function	0.26702	1	13	702	297	20361	1.01117e+116
GO:0000375	RNA splicing, via transesterification reactions	biological_process	0.26726	1	3	702	46	20361	1.01113e+23
GO:0030248	cellulose binding	molecular_function	0.26734	1	1	702	9	20361	101121914
GO:0048585	negative regulation of response to stimulus	biological_process	0.26759	1	2	702	28	20361	1.01124e+17
GO:0006810	transport	biological_process	0.26816	1	114	702	2839	20361	101106954,101109494,101114431,101108183,101114034,101109405,101107739,100233164,101110526,101114909,101109626,101114392,101112580,101109149,101116716,101110415,101105618,101112165,101109979,101118500,101119694,101112636,101119442,101103126,101113888,101119015,101110972,101120867,101104181,101122496,101110314,101123504,101122005,101116928,101120904,101108973,101113767,101112408,101115490,101115361…
GO:0001883	purine nucleoside binding	molecular_function	0.26929	1	86	702	2009	20361	101106781,101104247,101119512,101106341,101107438,101120395,101106113,101108264,101119067,105605801,101119199,101102513,101108844,101110391,101104486,101118097,101104309,101116625,101107425,101105030,101114291,101104227,101102402,101102395,101116201,101111867,101120982,101107106,101115582,101122941,101116194,101102074,101107295,101105428,101115254,101106986,101111683,101107789,101108762,101118863…
GO:0032549	ribonucleoside binding	molecular_function	0.26929	1	86	702	2009	20361	101115273,101119442,101103425,101115891,101109979,101102157,101119694,101119015,101112460,101122496,101122150,101118531,101109663,443010,101103929,101118973,101119989,101110526,101108960,101112580,101109626,101103590,105606759,101113270,101113739,101113487,101102311,101104881,101105473,101121788,101118975,101107709,101111828,101110314,101108755,101120630,100147794,101101998,101115490,101121782,10…
GO:0032550	purine ribonucleoside binding	molecular_function	0.26929	1	86	702	2009	20361	101113487,101113739,101102311,101105473,101104881,101103590,105606759,101113270,100135699,101116538,101121782,101115490,101115612,101108467,101121788,101118975,101107709,101110314,101111828,101101998,100147794,101108755,101120630,101119015,101112460,101122496,101118531,101122150,101119442,101115273,101119694,101109979,101102157,101103425,101115891,101118973,101119989,101110526,101112580,101108960…
GO:0008270	zinc ion binding	molecular_function	0.27171	1	66	702	1672	20361	101117684,101114233,101111386,101118531,101104181,101112864,101115163,101117793,101104040,101120031,100169935,101121880,101115695,101109713,101112322,101108650,101103929,101113586,101114682,101105027,101118949,101109559,101113270,101117026,443412,100653388,101117488,101101994,101107891,101102739,101118505,101105233,101109113,101118975,101102729,101120609,101103405,101111299,101104860,101122806,10…
GO:0017076	purine nucleotide binding	molecular_function	0.27191	1	87	702	2043	20361	101105030,101107425,101114291,101104227,101102402,101104486,101104309,101118097,101116625,101104118,101119067,101108264,105605801,101108844,101102513,101110391,101119199,101106781,101104247,101119512,101120395,101107438,101106341,101106113,101111683,101106986,101108762,101107789,101119632,105616317,101118863,101105428,101102074,101107295,101115254,101115582,101122941,101116194,101116201,101102395…
GO:0044429	mitochondrial part	cellular_component	0.27272	1	12	702	305	20361	1.01108e+107
GO:0019207	kinase regulator activity	molecular_function	0.27304	1	3	702	58	20361	1.01119e+26
GO:0006865	amino acid transport	biological_process	0.2739	1	3	702	64	20361	1.01113e+26
GO:0032555	purine ribonucleotide binding	molecular_function	0.27419	1	86	702	2013	20361	101103929,443010,101109663,101109626,101112580,101108960,101110526,101119989,101118973,101103425,101115891,101102157,101109979,101119694,101115273,101119442,101118531,101122150,101122496,101112460,101119015,101108755,101120630,100147794,101101998,101111828,101110314,101118975,101121788,101107709,101108467,101115612,101121782,101115490,101116538,100135699,101113270,105606759,101103590,101105473,10…
GO:0005634	nucleus	cellular_component	0.2751	1	78	702	2025	20361	101107196,101101895,101104040,101115273,101112864,101106329,101105618,101104535,101123644,101105203,101117261,101115263,101101949,443189,101109663,101115695,101109713,101114392,100169935,101117106,101120495,101102623,101108320,101105027,101115356,101109328,101113586,101123504,101109113,101110051,101114883,101110276,443412,101112408,100217409,100135699,100653388,101115785,101101994,101117488,10112…
GO:0005681	spliceosomal complex	cellular_component	0.27623	1	2	702	27	20361	443068101112880
GO:0030313	cell envelope	cellular_component	0.27633	1	2	702	25	20361	1.01121e+17
GO:0070085	glycosylation	biological_process	0.27854	1	6	702	113	20361	1.01108e+53
GO:0051382	kinetochore assembly	biological_process	0.28044	1	2	702	32	20361	1.01103e+17
GO:0051383	kinetochore organization	biological_process	0.28044	1	2	702	32	20361	1.01121e+17
GO:0031704	apelin receptor binding	molecular_function	0.28054	1	1	702	10	20361	101101931
GO:0006892	post-Golgi vesicle-mediated transport	biological_process	0.28069	1	1	702	9	20361	101119564
GO:0030155	regulation of cell adhesion	biological_process	0.28094	1	2	702	24	20361	1.0112e+17
GO:0051705	multi-organism behavior	biological_process	0.28131	1	2	702	26	20361	443189443053
GO:0042287	MHC protein binding	molecular_function	0.28165	1	1	702	9	20361	101105341
GO:0042289	MHC class II protein binding	molecular_function	0.28165	1	1	702	9	20361	101105341
GO:0001518	voltage-gated sodium channel complex	cellular_component	0.2817	1	2	702	22	20361	1.0112e+17
GO:0005248	voltage-gated sodium channel activity	molecular_function	0.2817	1	2	702	22	20361	1.01103e+17
GO:0034706	sodium channel complex	cellular_component	0.2817	1	2	702	22	20361	1.01103e+17
GO:0009259	ribonucleotide metabolic process	biological_process	0.28248	1	9	702	191	20361	1.01122e+77
GO:0019693	ribose phosphate metabolic process	biological_process	0.28248	1	9	702	191	20361	1.01104e+77
GO:0016779	nucleotidyltransferase activity	molecular_function	0.28281	1	21	702	504	20361	1.01109e+188
GO:0015399	primary active transmembrane transporter activity	molecular_function	0.2834	1	7	702	129	20361	1.01104e+62
GO:0015405	P-P-bond-hydrolysis-driven transmembrane transporter activity	molecular_function	0.2834	1	7	702	129	20361	1.01119e+62
GO:0009163	nucleoside biosynthetic process	biological_process	0.28391	1	6	702	134	20361	1.01106e+53
GO:0042455	ribonucleoside biosynthetic process	biological_process	0.28391	1	6	702	134	20361	1.01103e+53
GO:0004553	hydrolase activity, hydrolyzing O-glycosyl compounds	molecular_function	0.28416	1	10	702	214	20361	1.01122e+83
GO:0030686	90S preribosome	cellular_component	0.28427	1	1	702	12	20361	101120495
GO:0034457	Mpp10 complex	cellular_component	0.28427	1	1	702	12	20361	101120495
GO:0019028	viral capsid	cellular_component	0.28502	1	17	702	420	20361	1.01109e+152
GO:1901659	glycosyl compound biosynthetic process	biological_process	0.28569	1	6	702	135	20361	1.01103e+53
GO:0006900	membrane budding	biological_process	0.28579	1	1	702	9	20361	101117047
GO:0006901	vesicle coating	biological_process	0.28579	1	1	702	9	20361	101117047
GO:0007212	dopamine receptor signaling pathway	biological_process	0.28579	1	1	702	9	20361	101117047
GO:0030276	clathrin binding	molecular_function	0.28579	1	1	702	9	20361	101117047
GO:0032051	clathrin light chain binding	molecular_function	0.28579	1	1	702	9	20361	101117047
GO:0048268	clathrin coat assembly	biological_process	0.28579	1	1	702	9	20361	101117047
GO:0015093	ferrous iron transmembrane transporter activity	molecular_function	0.28698	1	4	702	89	20361	1.01108e+35
GO:0015684	ferrous iron transport	biological_process	0.28698	1	4	702	89	20361	1.01113e+35
GO:0071855	neuropeptide receptor binding	molecular_function	0.28704	1	1	702	11	20361	101101931
GO:0008218	bioluminescence	biological_process	0.28746	1	1	702	8	20361	101104100
GO:0003779	actin binding	molecular_function	0.28817	1	13	702	271	20361	1.06991e+116
GO:0031347	regulation of defense response	biological_process	0.28939	1	1	702	9	20361	101107646
GO:0009152	purine ribonucleotide biosynthetic process	biological_process	0.29106	1	7	702	152	20361	1.01122e+62
GO:0004668	protein-arginine deiminase activity	molecular_function	0.29151	1	1	702	9	20361	101112525
GO:0031225	anchored to membrane	cellular_component	0.29288	1	1	702	11	20361	101106620
GO:0007031	peroxisome organization	biological_process	0.29565	1	2	702	28	20361	1.01109e+17
GO:0005315	inorganic phosphate transmembrane transporter activity	molecular_function	0.29635	1	1	702	8	20361	101119015
GO:1901677	phosphate transmembrane transporter activity	molecular_function	0.29635	1	1	702	8	20361	101119015
GO:0007264	small GTPase mediated signal transduction	biological_process	0.29704	1	19	702	417	20361	1.01122e+170
GO:0030474	spindle pole body duplication	biological_process	0.29779	1	2	702	26	20361	1.01116e+17
GO:0051300	spindle pole body organization	biological_process	0.29779	1	2	702	26	20361	1.01115e+17
GO:0000725	recombinational repair	biological_process	0.29869	1	1	702	7	20361	101109980
GO:0031012	extracellular matrix	cellular_component	0.29928	1	11	702	220	20361	1.01117e+98
GO:0016286	small conductance calcium-activated potassium channel activity	molecular_function	0.29956	1	1	702	8	20361	101112056
GO:0097367	carbohydrate derivative binding	molecular_function	0.30033	1	4	702	68	20361	1.01112e+35
GO:0044445	cytosolic part	cellular_component	0.30044	1	4	702	91	20361	1.01113e+35
GO:0044003	modification by symbiont of host morphology or physiology	biological_process	0.30084	1	5	702	102	20361	1.01103e+44
GO:0008252	nucleotidase activity	molecular_function	0.30108	1	1	702	11	20361	101119265
GO:0008253	5'-nucleotidase activity	molecular_function	0.30108	1	1	702	11	20361	101119265
GO:0005876	spindle microtubule	cellular_component	0.30139	1	2	702	34	20361	1.01115e+17
GO:0006754	ATP biosynthetic process	biological_process	0.30291	1	4	702	90	20361	1.01104e+35
GO:0008452	RNA ligase activity	molecular_function	0.30356	1	1	702	8	20361	101116625
GO:0000049	tRNA binding	molecular_function	0.3042	1	2	702	35	20361	1.01104e+17
GO:0051817	modification of morphology or physiology of other organism involved in symbiotic interaction	biological_process	0.30472	1	5	702	103	20361	1.01103e+44
GO:0051179	localization	biological_process	0.30507	1	119	702	2998	20361	101116975,101115229,101107321,101104002,101122806,101118166,101106631,101119632,101117032,101116170,101121614,101114241,101122055,101108667,101121946,101103123,101122281,101119564,100642179,101122655,101122358,101111779,101116194,101101892,101120429,101106620,101113357,101113095,101119972,101108178,100913155,101102401,101103292,101111717,100125358,101105356,101108043,101102663,101109277,101104247…
GO:0045321	leukocyte activation	biological_process	0.3051	1	1	702	14	20361	101118500
GO:0009144	purine nucleoside triphosphate metabolic process	biological_process	0.30533	1	6	702	132	20361	4.43274e+50
GO:0009199	ribonucleoside triphosphate metabolic process	biological_process	0.30533	1	6	702	132	20361	1.01117e+50
GO:0009205	purine ribonucleoside triphosphate metabolic process	biological_process	0.30533	1	6	702	132	20361	1.01106e+50
GO:0008380	RNA splicing	biological_process	0.30557	1	4	702	65	20361	1.01117e+32
GO:0046873	metal ion transmembrane transporter activity	molecular_function	0.30562	1	22	702	514	20361	1.0111e+194
GO:0006551	leucine metabolic process	biological_process	0.30588	1	1	702	6	20361	101105233
GO:0009098	leucine biosynthetic process	biological_process	0.30588	1	1	702	6	20361	101105233
GO:0005694	chromosome	cellular_component	0.30598	1	14	702	338	20361	1.01123e+125
GO:0006778	porphyrin-containing compound metabolic process	biological_process	0.30744	1	4	702	72	20361	1.01104e+35
GO:0051186	cofactor metabolic process	biological_process	0.30926	1	9	702	181	20361	1.01122e+80
GO:0009116	nucleoside metabolic process	biological_process	0.3097	1	9	702	209	20361	1.01104e+77
GO:1901657	glycosyl compound metabolic process	biological_process	0.31114	1	9	702	210	20361	1.01117e+77
GO:0070603	SWI/SNF superfamily-type complex	cellular_component	0.31178	1	1	702	9	20361	101115263
GO:0007623	circadian rhythm	biological_process	0.31212	1	1	702	11	20361	100217409
GO:0006096	glycolysis	biological_process	0.31267	1	2	702	30	20361	101115891443440
GO:0016055	Wnt receptor signaling pathway	biological_process	0.31277	1	4	702	70	20361	1.01124e+35
GO:0019900	kinase binding	molecular_function	0.31293	1	3	702	50	20361	1.01122e+26
GO:0016742	hydroxymethyl-, formyl- and related transferase activity	molecular_function	0.31305	1	1	702	8	20361	101113311
GO:0048583	regulation of response to stimulus	biological_process	0.3135	1	14	702	280	20361	1.01112e+125
GO:0051495	positive regulation of cytoskeleton organization	biological_process	0.31646	1	2	702	33	20361	1.01108e+17
GO:0016798	hydrolase activity, acting on glycosyl bonds	molecular_function	0.3167	1	11	702	243	20361	4.43068e+92
GO:0016830	carbon-carbon lyase activity	molecular_function	0.31697	1	6	702	112	20361	1.01105e+50
GO:0006812	cation transport	biological_process	0.31733	1	32	702	773	20361	101122358,101116194,101104181,101105618,101108667,101103126,101118500,101109979,101119694,101114909,101107321,101114392,101114431,101104156,101113487,101123469,101115356,443488,101105473,100302553,101115623,101103679,101115361,101103905,101105356,101108043,101108467,101112056,100125358,101113095,101106620,101116928
GO:0009260	ribonucleotide biosynthetic process	biological_process	0.31741	1	7	702	155	20361	1.01122e+62
GO:0046390	ribose phosphate biosynthetic process	biological_process	0.31741	1	7	702	155	20361	1.01103e+62
GO:0003682	chromatin binding	molecular_function	0.3194	1	3	702	66	20361	1.0111e+26
GO:0006152	purine nucleoside catabolic process	biological_process	0.31942	1	2	702	22	20361	101117299443274
GO:0006184	GTP catabolic process	biological_process	0.31942	1	2	702	22	20361	443274101117299
GO:0009143	nucleoside triphosphate catabolic process	biological_process	0.31942	1	2	702	22	20361	443274101117299
GO:0009146	purine nucleoside triphosphate catabolic process	biological_process	0.31942	1	2	702	22	20361	443274101117299
GO:0009203	ribonucleoside triphosphate catabolic process	biological_process	0.31942	1	2	702	22	20361	443274101117299
GO:0009207	purine ribonucleoside triphosphate catabolic process	biological_process	0.31942	1	2	702	22	20361	443274101117299
GO:0033124	regulation of GTP catabolic process	biological_process	0.31942	1	2	702	22	20361	101117299443274
GO:0043087	regulation of GTPase activity	biological_process	0.31942	1	2	702	22	20361	101117299443274
GO:0046130	purine ribonucleoside catabolic process	biological_process	0.31942	1	2	702	22	20361	443274101117299
GO:1901069	guanosine-containing compound catabolic process	biological_process	0.31942	1	2	702	22	20361	443274101117299
GO:0030173	integral to Golgi membrane	cellular_component	0.31998	1	1	702	8	20361	101103126
GO:0031228	intrinsic to Golgi membrane	cellular_component	0.31998	1	1	702	8	20361	101103126
GO:0004812	aminoacyl-tRNA ligase activity	molecular_function	0.32008	1	4	702	75	20361	1.01112e+35
GO:0006873	cellular ion homeostasis	biological_process	0.32062	1	3	702	86	20361	1.01119e+26
GO:0006875	cellular metal ion homeostasis	biological_process	0.32062	1	3	702	86	20361	1.01121e+26
GO:0030003	cellular cation homeostasis	biological_process	0.32062	1	3	702	86	20361	1.01119e+26
GO:0008081	phosphoric diester hydrolase activity	molecular_function	0.3207	1	5	702	76	20361	1.01119e+44
GO:0016209	antioxidant activity	molecular_function	0.32087	1	3	702	64	20361	1.01109e+26
GO:0006164	purine nucleotide biosynthetic process	biological_process	0.32145	1	7	702	159	20361	1.01106e+62
GO:0015085	calcium ion transmembrane transporter activity	molecular_function	0.3218	1	3	702	57	20361	1.01121e+26
GO:0045595	regulation of cell differentiation	biological_process	0.32196	1	1	702	11	20361	101119564
GO:0000003	reproduction	biological_process	0.32292	1	18	702	453	20361	1.05604e+155
GO:0009166	nucleotide catabolic process	biological_process	0.32325	1	3	702	45	20361	1.01102e+23
GO:0009894	regulation of catabolic process	biological_process	0.32519	1	7	702	133	20361	1.01111e+59
GO:0042886	amide transport	biological_process	0.32556	1	1	702	10	20361	101103292
GO:0004725	protein tyrosine phosphatase activity	molecular_function	0.32573	1	6	702	106	20361	1.01102e+53
GO:0009164	nucleoside catabolic process	biological_process	0.3266	1	2	702	23	20361	443274101117299
GO:0042454	ribonucleoside catabolic process	biological_process	0.3266	1	2	702	23	20361	101117299443274
GO:1901658	glycosyl compound catabolic process	biological_process	0.3266	1	2	702	23	20361	443274101117299
GO:0004112	cyclic-nucleotide phosphodiesterase activity	molecular_function	0.3267	1	3	702	39	20361	1.01119e+26
GO:1901292	nucleoside phosphate catabolic process	biological_process	0.3269	1	3	702	46	20361	1.01102e+23
GO:0046933	proton-transporting ATP synthase activity, rotational mechanism	molecular_function	0.32735	1	1	702	11	20361	101104156
GO:0000776	kinetochore	cellular_component	0.32873	1	5	702	110	20361	1.01116e+44
GO:0005261	cation channel activity	molecular_function	0.32899	1	11	702	236	20361	1.01119e+95
GO:0047396	glycosylphosphatidylinositol diacylglycerol-lyase activity	molecular_function	0.32903	1	1	702	12	20361	101113256
GO:0050829	defense response to Gram-negative bacterium	biological_process	0.33051	1	1	702	9	20361	101123125
GO:0004185	serine-type carboxypeptidase activity	molecular_function	0.33073	1	1	702	8	20361	101107196
GO:0005861	troponin complex	cellular_component	0.33086	1	1	702	11	20361	101105233
GO:0005865	striated muscle thin filament	cellular_component	0.33086	1	1	702	11	20361	101105233
GO:0030016	myofibril	cellular_component	0.33086	1	1	702	11	20361	101105233
GO:0030017	sarcomere	cellular_component	0.33086	1	1	702	11	20361	101105233
GO:0036379	myofilament	cellular_component	0.33086	1	1	702	11	20361	101105233
GO:0043292	contractile fiber	cellular_component	0.33086	1	1	702	11	20361	101105233
GO:0044449	contractile fiber part	cellular_component	0.33086	1	1	702	11	20361	101105233
GO:0006275	regulation of DNA replication	biological_process	0.3318	1	2	702	38	20361	1.01112e+17
GO:0006310	DNA recombination	biological_process	0.33197	1	9	702	199	20361	1.01123e+80
GO:0042546	cell wall biogenesis	biological_process	0.33337	1	1	702	9	20361	101116804
GO:0050801	ion homeostasis	biological_process	0.3336	1	3	702	87	20361	1.0112e+26
GO:0055065	metal ion homeostasis	biological_process	0.3336	1	3	702	87	20361	1.01119e+26
GO:0055080	cation homeostasis	biological_process	0.3336	1	3	702	87	20361	1.01121e+26
GO:0000275	mitochondrial proton-transporting ATP synthase complex, catalytic core F(1)	cellular_component	0.33362	1	1	702	11	20361	101118975
GO:0044461	bacterial-type flagellum part	cellular_component	0.33473	1	1	702	11	20361	101112662
GO:0046812	host cell surface binding	molecular_function	0.33524	1	1	702	9	20361	101117891
GO:0065004	protein-DNA complex assembly	biological_process	0.33594	1	4	702	102	20361	1.01103e+35
GO:0071824	protein-DNA complex subunit organization	biological_process	0.33594	1	4	702	102	20361	1.01115e+35
GO:0020037	heme binding	molecular_function	0.33638	1	7	702	176	20361	1.01105e+59
GO:0016051	carbohydrate biosynthetic process	biological_process	0.33792	1	5	702	99	20361	1.01111e+44
GO:0006955	immune response	biological_process	0.33811	1	10	702	322	20361	1.01113e+86
GO:0000226	microtubule cytoskeleton organization	biological_process	0.33882	1	7	702	145	20361	1.01116e+62
GO:0044765	single-organism transport	biological_process	0.33939	1	85	702	2155	20361	101108183,101114431,101107739,101109494,101109626,101114392,101109149,100233164,101114909,101112636,101119694,101112165,101118500,101109979,101103126,101116716,101105618,101110415,101120867,101122496,101104181,101119015,101116928,101120904,101122005,101112056,101108467,101118936,101103905,101112408,101113767,101115361,101115490,101103679,101113961,101117047,101115623,100302553,101105027,443488,10…
GO:0070925	organelle assembly	biological_process	0.33984	1	5	702	111	20361	1.01103e+44
GO:0007088	regulation of mitosis	biological_process	0.34124	1	2	702	38	20361	1.01109e+17
GO:0051783	regulation of nuclear division	biological_process	0.34124	1	2	702	38	20361	1.01109e+17
GO:0043170	macromolecule metabolic process	biological_process	0.34365	1	231	702	6637	20361	101116625,101108670,101111390,101107758,101104486,101115508,101116062,101111609,101104227,100125358,101109737,101103292,101102265,101105030,101107425,101117436,101122961,101104449,101119512,101111550,101111545,101108271,101104074,101106824,101102513,101121483,101110391,101119199,105602103,101112046,101105074,101108920,101109980,101119067,101116835,101108264,443262,101108067,101104304,101108317,10…
GO:0019637	organophosphate metabolic process	biological_process	0.3438	1	21	702	504	20361	1.01108e+182
GO:0035821	modification of morphology or physiology of other organism	biological_process	0.34404	1	5	702	108	20361	1.01103e+44
GO:0009154	purine ribonucleotide catabolic process	biological_process	0.34426	1	2	702	23	20361	443274101117299
GO:0009261	ribonucleotide catabolic process	biological_process	0.34426	1	2	702	23	20361	443274101117299
GO:0000777	condensed chromosome kinetochore	cellular_component	0.34431	1	4	702	90	20361	1.01115e+35
GO:0000779	condensed chromosome, centromeric region	cellular_component	0.34431	1	4	702	90	20361	1.01116e+35
GO:0009141	nucleoside triphosphate metabolic process	biological_process	0.34559	1	6	702	142	20361	1.01106e+50
GO:0000077	DNA damage checkpoint	biological_process	0.34608	1	1	702	14	20361	101106170
GO:0031570	DNA integrity checkpoint	biological_process	0.34608	1	1	702	14	20361	101106170
GO:0006163	purine nucleotide metabolic process	biological_process	0.34658	1	9	702	208	20361	4.43274e+77
GO:0006383	transcription from RNA polymerase III promoter	biological_process	0.34859	1	2	702	35	20361	1.0111e+17
GO:0035639	purine ribonucleoside triphosphate binding	molecular_function	0.34859	1	84	702	2006	20361	101119989,101118973,101110526,101112580,101108960,101109626,101109663,443010,101103929,101119015,101112460,101122496,101122150,101118531,101115273,101119442,101103425,101115891,101119694,101109979,101102157,101115490,101121782,101116538,101115612,101108467,101118975,101121788,101107709,101111828,101110314,101108755,100147794,101120630,101101998,101113739,101113487,101102311,101105473,101104881,10…
GO:0042325	regulation of phosphorylation	biological_process	0.34869	1	2	702	30	20361	1.01103e+17
GO:0019200	carbohydrate kinase activity	molecular_function	0.34874	1	2	702	35	20361	1.01116e+17
GO:0048584	positive regulation of response to stimulus	biological_process	0.34958	1	3	702	64	20361	1.01108e+26
GO:0051052	regulation of DNA metabolic process	biological_process	0.35073	1	2	702	40	20361	1.0112e+17
GO:0005921	gap junction	cellular_component	0.35119	1	1	702	13	20361	101105473
GO:0001664	G-protein coupled receptor binding	molecular_function	0.35169	1	2	702	60	20361	1.0112e+17
GO:0030029	actin filament-based process	biological_process	0.35188	1	4	702	80	20361	1.01107e+35
GO:0030036	actin cytoskeleton organization	biological_process	0.35188	1	4	702	80	20361	1.0112e+35
GO:0019722	calcium-mediated signaling	biological_process	0.35208	1	1	702	12	20361	101105642
GO:0019932	second-messenger-mediated signaling	biological_process	0.35208	1	1	702	12	20361	101105642
GO:0015002	heme-copper terminal oxidase activity	molecular_function	0.35395	1	4	702	88	20361	1.01102e+35
GO:0006007	glucose catabolic process	biological_process	0.35417	1	2	702	35	20361	101115891443440
GO:0019320	hexose catabolic process	biological_process	0.35417	1	2	702	35	20361	443440101115891
GO:0051270	regulation of cellular component movement	biological_process	0.35646	1	2	702	32	20361	1.01109e+17
GO:2000145	regulation of cell motility	biological_process	0.35646	1	2	702	32	20361	1.01109e+17
GO:0031967	organelle envelope	cellular_component	0.35717	1	12	702	313	20361	1.01108e+107
GO:0050790	regulation of catalytic activity	biological_process	0.35726	1	6	702	116	20361	1.01102e+50
GO:0036094	small molecule binding	molecular_function	0.35894	1	97	702	2343	20361	101120982,101107106,101111867,101121946,101102395,101116201,101116194,101122941,101115582,101115254,101102074,101107295,101105428,105616317,101118863,101119632,101110296,101108762,101107789,101107321,101106986,101111683,101106113,101106341,101120395,101107438,101104247,101119512,101111207,101106781,101110391,101102513,101108844,101119199,105605801,101108264,101119067,101104118,101116625,101118097…
GO:0072522	purine-containing compound biosynthetic process	biological_process	0.35993	1	7	702	167	20361	1.01122e+62
GO:0009620	response to fungus	biological_process	0.35996	1	1	702	11	20361	101114878
GO:0050832	defense response to fungus	biological_process	0.35996	1	1	702	11	20361	101114878
GO:0016831	carboxy-lyase activity	molecular_function	0.36082	1	5	702	94	20361	1.01122e+44
GO:0031644	regulation of neurological system process	biological_process	0.36257	1	1	702	8	20361	101120756
GO:0050804	regulation of synaptic transmission	biological_process	0.36257	1	1	702	8	20361	101120756
GO:0051969	regulation of transmission of nerve impulse	biological_process	0.36257	1	1	702	8	20361	101120756
GO:0005381	iron ion transmembrane transporter activity	molecular_function	0.36261	1	4	702	95	20361	1.01116e+35
GO:0030435	sporulation resulting in formation of a cellular spore	biological_process	0.36309	1	1	702	12	20361	101121829
GO:0016567	protein ubiquitination	biological_process	0.36337	1	3	702	60	20361	1.0112e+26
GO:0006914	autophagy	biological_process	0.36386	1	11	702	261	20361	1.05606e+98
GO:0042375	quinone cofactor metabolic process	biological_process	0.3643	1	1	702	12	20361	101107196
GO:0045426	quinone cofactor biosynthetic process	biological_process	0.3643	1	1	702	12	20361	101107196
GO:0007346	regulation of mitotic cell cycle	biological_process	0.36458	1	2	702	42	20361	1.01116e+17
GO:0019072	viral genome packaging	biological_process	0.36468	1	1	702	13	20361	101118097
GO:0051260	protein homooligomerization	biological_process	0.36521	1	3	702	66	20361	1.01103e+26
GO:0055082	cellular chemical homeostasis	biological_process	0.3655	1	3	702	90	20361	1.01121e+26
GO:0031399	regulation of protein modification process	biological_process	0.36572	1	2	702	27	20361	1.01113e+17
GO:0015298	solute:cation antiporter activity	molecular_function	0.36666	1	2	702	26	20361	1.01116e+17
GO:0015299	solute:hydrogen antiporter activity	molecular_function	0.36666	1	2	702	26	20361	1.01117e+17
GO:0005938	cell cortex	cellular_component	0.3671	1	5	702	94	20361	1.01122e+44
GO:0010638	positive regulation of organelle organization	biological_process	0.36733	1	2	702	38	20361	1.0112e+17
GO:0046034	ATP metabolic process	biological_process	0.3682	1	4	702	100	20361	1.01104e+35
GO:0008417	fucosyltransferase activity	molecular_function	0.36825	1	1	702	13	20361	101116804
GO:0022604	regulation of cell morphogenesis	biological_process	0.3685	1	1	702	11	20361	101119564
GO:0000166	nucleotide binding	molecular_function	0.36861	1	95	702	2299	20361	101105030,101107425,101114291,101104227,101102402,101104486,101104309,101118097,101116625,101104118,101119067,101108264,105605801,101110391,101102513,101108844,101119199,101106781,101111207,101119512,101104247,101107438,101120395,101106341,101106113,101111683,101106986,101107321,101108762,101107789,101119632,101110296,101118863,105616317,101105428,101107295,101102074,101115254,101115582,101122941…
GO:1901265	nucleoside phosphate binding	molecular_function	0.36861	1	95	702	2299	20361	105606759,101113270,101115623,101103590,101102311,101105473,101104881,101113487,101119852,101113739,101107997,101101998,101108755,101120630,100147794,101118975,101107709,101121788,101110314,101111828,101108467,100135699,101116538,101121782,101115490,101115612,101119442,101115273,101109979,101119694,101102157,101103425,101115891,101122496,101122150,101118531,101119015,101112460,443010,101103929,10…
GO:0051276	chromosome organization	biological_process	0.36884	1	9	702	218	20361	1.01123e+80
GO:0051246	regulation of protein metabolic process	biological_process	0.36901	1	3	702	58	20361	1.01113e+26
GO:0016052	carbohydrate catabolic process	biological_process	0.37112	1	3	702	64	20361	1.01123e+23
GO:0052689	carboxylic ester hydrolase activity	molecular_function	0.37204	1	3	702	57	20361	1.01114e+26
GO:0043903	regulation of symbiosis, encompassing mutualism through parasitism	biological_process	0.37207	1	1	702	14	20361	101115254
GO:0019566	arabinose metabolic process	biological_process	0.37348	1	1	702	10	20361	101108755
GO:0046373	L-arabinose metabolic process	biological_process	0.37348	1	1	702	10	20361	101108755
GO:0046556	alpha-N-arabinofuranosidase activity	molecular_function	0.37348	1	1	702	10	20361	101108755
GO:0000793	condensed chromosome	cellular_component	0.37365	1	5	702	116	20361	1.01114e+44
GO:0003954	NADH dehydrogenase activity	molecular_function	0.37484	1	3	702	56	20361	1.0111e+26
GO:0048511	rhythmic process	biological_process	0.37531	1	1	702	14	20361	100217409
GO:0033588	Elongator holoenzyme complex	cellular_component	0.37643	1	1	702	10	20361	101108762
GO:0003676	nucleic acid binding	molecular_function	0.37764	1	132	702	3829	20361	100125358,101116062,101112662,101103292,101108670,101104486,101121829,101108844,101119199,101114240,101111507,101104449,101108271,101106824,101111545,101123350,101106631,101122806,101103984,101108762,101104304,101108067,101108317,101114112,101120429,101113497,101122358,101104380,101122055,101116201,101110276,101121532,443412,101112408,101104973,101121782,101115490,100653388,100217409,101120609,10…
GO:0001934	positive regulation of protein phosphorylation	biological_process	0.37776	1	1	702	10	20361	101113261
GO:0042327	positive regulation of phosphorylation	biological_process	0.37776	1	1	702	10	20361	101113261
GO:0006323	DNA packaging	biological_process	0.37842	1	4	702	96	20361	1.01114e+35
GO:0016627	oxidoreductase activity, acting on the CH-CH group of donors	molecular_function	0.3788	1	5	702	100	20361	1.01119e+44
GO:0016780	phosphotransferase activity, for other substituted phosphate groups	molecular_function	0.37926	1	1	702	13	20361	101102610
GO:0051707	response to other organism	biological_process	0.37944	1	8	702	180	20361	1.01123e+71
GO:0014065	phosphatidylinositol 3-kinase cascade	biological_process	0.37968	1	1	702	14	20361	101103984
GO:0014066	regulation of phosphatidylinositol 3-kinase cascade	biological_process	0.37968	1	1	702	14	20361	101103984
GO:0014068	positive regulation of phosphatidylinositol 3-kinase cascade	biological_process	0.37968	1	1	702	14	20361	101103984
GO:0043548	phosphatidylinositol 3-kinase binding	molecular_function	0.37968	1	1	702	14	20361	101103984
GO:0048015	phosphatidylinositol-mediated signaling	biological_process	0.37968	1	1	702	14	20361	101103984
GO:0048017	inositol lipid-mediated signaling	biological_process	0.37968	1	1	702	14	20361	101103984
GO:0009142	nucleoside triphosphate biosynthetic process	biological_process	0.38009	1	4	702	100	20361	1.01104e+35
GO:0009145	purine nucleoside triphosphate biosynthetic process	biological_process	0.38009	1	4	702	100	20361	1.01119e+35
GO:0009201	ribonucleoside triphosphate biosynthetic process	biological_process	0.38009	1	4	702	100	20361	1.01103e+35
GO:0009206	purine ribonucleoside triphosphate biosynthetic process	biological_process	0.38009	1	4	702	100	20361	1.01119e+35
GO:0072521	purine-containing compound metabolic process	biological_process	0.38021	1	9	702	216	20361	1.01117e+77
GO:0005773	vacuole	cellular_component	0.3803	1	2	702	30	20361	1.01111e+17
GO:0008915	lipid-A-disaccharide synthase activity	molecular_function	0.38217	1	1	702	17	20361	101114682
GO:0044459	plasma membrane part	cellular_component	0.38233	1	9	702	214	20361	1.01115e+80
GO:0002376	immune system process	biological_process	0.38259	1	11	702	357	20361	1.01105e+95
GO:0016874	ligase activity	molecular_function	0.38315	1	18	702	409	20361	1.01115e+161
GO:0008324	cation transmembrane transporter activity	molecular_function	0.38555	1	34	702	863	20361	101108183,101114431,101111639,101106340,101120031,101108667,101105618,101109979,101118500,101119694,101103126,101122358,101120429,101116194,101104181,101113095,101116928,101115361,101107891,101112056,100125358,101108467,101105356,101118505,101101902,101115623,101123469,101104156,101113487,101120605,100302553,443488,101105473,101115356
GO:0040012	regulation of locomotion	biological_process	0.38615	1	2	702	34	20361	1.01109e+17
GO:0001897	cytolysis by symbiont of host cells	biological_process	0.38666	1	1	702	10	20361	101120756
GO:0019836	hemolysis by symbiont of host erythrocytes	biological_process	0.38666	1	1	702	10	20361	101120756
GO:0006461	protein complex assembly	biological_process	0.38676	1	18	702	458	20361	1.05616e+161
GO:1901700	response to oxygen-containing compound	biological_process	0.38709	1	2	702	31	20361	1.01112e+17
GO:0004867	serine-type endopeptidase inhibitor activity	molecular_function	0.38727	1	3	702	61	20361	1.01112e+26
GO:0001765	membrane raft assembly	biological_process	0.38806	1	1	702	12	20361	101108178
GO:0031579	membrane raft organization	biological_process	0.38806	1	1	702	12	20361	101108178
GO:0070836	caveola assembly	biological_process	0.38806	1	1	702	12	20361	101108178
GO:0070271	protein complex biogenesis	biological_process	0.38855	1	18	702	459	20361	1.01102e+161
GO:0071826	ribonucleoprotein complex subunit organization	biological_process	0.38863	1	1	702	11	20361	443068
GO:0006644	phospholipid metabolic process	biological_process	0.38885	1	7	702	159	20361	1.0112e+59
GO:0046906	tetrapyrrole binding	molecular_function	0.38952	1	7	702	185	20361	1.01105e+59
GO:0001948	glycoprotein binding	molecular_function	0.38952	1	1	702	10	20361	101106341
GO:0043394	proteoglycan binding	molecular_function	0.38952	1	1	702	10	20361	101106341
GO:0043395	heparan sulfate proteoglycan binding	molecular_function	0.38952	1	1	702	10	20361	101106341
GO:0006432	phenylalanyl-tRNA aminoacylation	biological_process	0.38982	1	1	702	9	20361	101121788
GO:0004017	adenylate kinase activity	molecular_function	0.38993	1	5	702	144	20361	1.01113e+44
GO:0008509	anion transmembrane transporter activity	molecular_function	0.39072	1	6	702	140	20361	1.01121e+53
GO:0044702	single organism reproductive process	biological_process	0.39079	1	6	702	138	20361	1.01112e+53
GO:0019048	modulation by virus of host morphology or physiology	biological_process	0.39105	1	4	702	92	20361	1.01121e+35
GO:0006721	terpenoid metabolic process	biological_process	0.39198	1	2	702	33	20361	1.01122e+17
GO:0016114	terpenoid biosynthetic process	biological_process	0.39198	1	2	702	33	20361	1.01119e+17
GO:1901363	heterocyclic compound binding	molecular_function	0.39215	1	205	702	5697	20361	101112580,101108960,101114392,101118973,101119989,443010,101115263,101103929,101108379,101106899,101115695,101111386,101109289,101112460,101115273,101104040,101103425,101119363,101116716,101105239,101110276,101121532,101108467,101115490,101121782,100217409,100653388,101104973,101112408,443412,101120609,101103069,100147794,105613870,101101998,101110051,101121788,101107709,101111828,101123504,10111…
GO:0051726	regulation of cell cycle	biological_process	0.39239	1	5	702	126	20361	1.01103e+44
GO:0097159	organic cyclic compound binding	molecular_function	0.39437	1	205	702	5698	20361	101118097,101104118,101114267,101114511,101102402,101114291,101120976,443513,101106341,101107438,101120395,101106113,101107483,101104902,101111207,101106781,101104247,101107495,101104061,101103795,101119298,101115254,101102074,105605100,101105428,554257,101111845,101116328,105616317,101118863,101119632,101107789,101107321,101122606,101120982,101107106,101122281,100642179,101108732,101113223,10112…
GO:0051130	positive regulation of cellular component organization	biological_process	0.39535	1	2	702	42	20361	1.0112e+17
GO:0050776	regulation of immune response	biological_process	0.39698	1	2	702	45	20361	1.01108e+17
GO:0005520	insulin-like growth factor binding	molecular_function	0.39714	1	1	702	21	20361	101109099
GO:0051801	cytolysis in other organism involved in symbiotic interaction	biological_process	0.39869	1	1	702	11	20361	101120756
GO:0052331	hemolysis in other organism involved in symbiotic interaction	biological_process	0.39869	1	1	702	11	20361	101120756
GO:0009967	positive regulation of signal transduction	biological_process	0.39869	1	2	702	40	20361	1.01104e+17
GO:0010647	positive regulation of cell communication	biological_process	0.39869	1	2	702	40	20361	1.01104e+17
GO:0023056	positive regulation of signaling	biological_process	0.39869	1	2	702	40	20361	1.01104e+17
GO:0034220	ion transmembrane transport	biological_process	0.39907	1	13	702	336	20361	1.01113e+116
GO:0006672	ceramide metabolic process	biological_process	0.39908	1	1	702	13	20361	101114027
GO:0033644	host cell membrane	cellular_component	0.39908	1	2	702	32	20361	1.05613e+17
GO:0044218	other organism cell membrane	cellular_component	0.39908	1	2	702	32	20361	1.05613e+17
GO:0044279	other organism membrane	cellular_component	0.39908	1	2	702	32	20361	1.01123e+17
GO:0005768	endosome	cellular_component	0.39971	1	1	702	14	20361	101111207
GO:0044440	endosomal part	cellular_component	0.39971	1	1	702	14	20361	101111207
GO:0005874	microtubule	cellular_component	0.40051	1	2	702	40	20361	1.01114e+17
GO:0043168	anion binding	molecular_function	0.40105	1	98	702	2371	20361	101102074,101107295,101105428,101115254,101107789,101108762,101106986,101111683,101118863,105616317,101119632,101111867,101119265,101116201,101121946,101102395,101120982,101107106,101115582,101116194,101122941,101104486,101116625,101118097,101104309,101114291,101105030,101107425,101102402,101104227,101119512,101104247,101106781,101106113,101106341,101120395,101107438,105605801,101108264,101119067…
GO:0009372	quorum sensing	biological_process	0.40194	1	1	702	9	20361	101115641
GO:0048872	homeostasis of number of cells	biological_process	0.40194	1	1	702	9	20361	101115641
GO:0048874	homeostasis of number of cells in a free-living population	biological_process	0.40194	1	1	702	9	20361	101115641
GO:0000772	mating pheromone activity	molecular_function	0.4022	1	1	702	12	20361	443412
GO:0009378	four-way junction helicase activity	molecular_function	0.40304	1	3	702	61	20361	1.01105e+26
GO:0016820	hydrolase activity, acting on acid anhydrides, catalyzing transmembrane movement of substances	molecular_function	0.40335	1	8	702	168	20361	1.01104e+71
GO:0042623	ATPase activity, coupled	molecular_function	0.40411	1	9	702	199	20361	1.01122e+80
GO:0001558	regulation of cell growth	biological_process	0.40491	1	1	702	22	20361	101109099
GO:0001871	pattern binding	molecular_function	0.4055	1	2	702	37	20361	1.0111e+17
GO:0030247	polysaccharide binding	molecular_function	0.4055	1	2	702	37	20361	1.0111e+17
GO:0010564	regulation of cell cycle process	biological_process	0.40693	1	3	702	70	20361	1.01109e+26
GO:0005578	proteinaceous extracellular matrix	cellular_component	0.40741	1	7	702	147	20361	1.01106e+62
GO:0016813	hydrolase activity, acting on carbon-nitrogen (but not peptide) bonds, in linear amidines	molecular_function	0.40744	1	1	702	12	20361	101112525
GO:0004511	tyrosine 3-monooxygenase activity	molecular_function	0.4076	1	1	702	14	20361	101102402
GO:0042995	cell projection	cellular_component	0.40786	1	5	702	116	20361	1.01113e+44
GO:0019953	sexual reproduction	biological_process	0.40835	1	6	702	143	20361	1.01102e+53
GO:0005975	carbohydrate metabolic process	biological_process	0.40905	1	24	702	608	20361	1.01107e+209
GO:0030493	bacteriochlorophyll metabolic process	biological_process	0.41016	1	1	702	11	20361	101103795
GO:0030494	bacteriochlorophyll biosynthetic process	biological_process	0.41016	1	1	702	11	20361	101103795
GO:0042181	ketone biosynthetic process	biological_process	0.41039	1	1	702	14	20361	101107196
GO:1901661	quinone metabolic process	biological_process	0.41039	1	1	702	14	20361	101107196
GO:1901663	quinone biosynthetic process	biological_process	0.41039	1	1	702	14	20361	101107196
GO:0005929	cilium	cellular_component	0.41059	1	4	702	89	20361	1.01114e+35
GO:0031514	motile cilium	cellular_component	0.41059	1	4	702	89	20361	1.00233e+35
GO:0009360	DNA polymerase III complex	cellular_component	0.41132	1	1	702	16	20361	101107166
GO:0042575	DNA polymerase complex	cellular_component	0.41132	1	1	702	16	20361	101107166
GO:0009617	response to bacterium	biological_process	0.41135	1	4	702	88	20361	1.01103e+35
GO:0042742	defense response to bacterium	biological_process	0.41135	1	4	702	88	20361	1.01123e+35
GO:0000990	core RNA polymerase binding transcription factor activity	molecular_function	0.41154	1	2	702	35	20361	1.0111e+17
GO:0000996	core DNA-dependent RNA polymerase binding promoter specificity activity	molecular_function	0.41154	1	2	702	35	20361	1.01123e+17
GO:0016987	sigma factor activity	molecular_function	0.41154	1	2	702	35	20361	1.01123e+17
GO:0019321	pentose metabolic process	biological_process	0.41226	1	1	702	12	20361	101108755
GO:0004499	N,N-dimethylaniline monooxygenase activity	molecular_function	0.41403	1	1	702	11	20361	101118975
GO:0019838	growth factor binding	molecular_function	0.41482	1	1	702	23	20361	101109099
GO:0006750	glutathione biosynthetic process	biological_process	0.41514	1	1	702	11	20361	101114822
GO:0019184	nonribosomal peptide biosynthetic process	biological_process	0.41514	1	1	702	11	20361	101114822
GO:0004497	monooxygenase activity	molecular_function	0.41524	1	3	702	55	20361	1.01119e+26
GO:0055086	nucleobase-containing small molecule metabolic process	biological_process	0.41586	1	14	702	353	20361	1.01103e+119
GO:0033013	tetrapyrrole metabolic process	biological_process	0.41596	1	5	702	110	20361	1.01104e+44
GO:0044766	multi-organism transport	biological_process	0.41602	1	1	702	15	20361	101118166
GO:0046365	monosaccharide catabolic process	biological_process	0.41696	1	2	702	40	20361	101115891443440
GO:0006753	nucleoside phosphate metabolic process	biological_process	0.4174	1	12	702	303	20361	1.01107e+104
GO:0044448	cell cortex part	cellular_component	0.41828	1	4	702	81	20361	1.01116e+35
GO:0065009	regulation of molecular function	biological_process	0.41835	1	6	702	125	20361	1.01103e+50
GO:0016788	hydrolase activity, acting on ester bonds	molecular_function	0.41949	1	40	702	926	20361	101106170,101106113,101119369,101103679,101119512,101110391,101121483,101112759,101107646,101117580,101119972,101102003,101110045,101114027,101118505,101112662,101117488,443513,101112408,100820740,101106001,101119265,101101909,101111299,101108803,101113628,101112093,101115582,101107739,101113174,101108200,101123195,101104304,101112333,101119906,101111593,101106954,101113714,101109302,101119989
GO:0032446	protein modification by small protein conjugation	biological_process	0.42177	1	3	702	66	20361	1.01113e+26
GO:0008083	growth factor activity	molecular_function	0.42347	1	5	702	124	20361	1.05606e+44
GO:0045229	external encapsulating structure organization	biological_process	0.42408	1	1	702	17	20361	101116835
GO:0030131	clathrin adaptor complex	cellular_component	0.42509	1	1	702	16	20361	101104002
GO:0008134	transcription factor binding	molecular_function	0.42568	1	8	702	190	20361	1.05606e+71
GO:0004312	fatty acid synthase activity	molecular_function	0.4257	1	1	702	12	20361	101117580
GO:0043161	proteasomal ubiquitin-dependent protein catabolic process	biological_process	0.42594	1	1	702	13	20361	101102610
GO:0019220	regulation of phosphate metabolic process	biological_process	0.42657	1	4	702	78	20361	1.01113e+32
GO:0051174	regulation of phosphorus metabolic process	biological_process	0.42657	1	4	702	78	20361	1.01117e+32
GO:0006665	sphingolipid metabolic process	biological_process	0.42732	1	1	702	15	20361	101114027
GO:0033043	regulation of organelle organization	biological_process	0.42747	1	5	702	129	20361	1.01108e+44
GO:0005777	peroxisome	cellular_component	0.4279	1	2	702	36	20361	1.01118e+17
GO:0042579	microbody	cellular_component	0.4279	1	2	702	36	20361	1.01118e+17
GO:0006486	protein glycosylation	biological_process	0.42798	1	5	702	111	20361	1.01123e+44
GO:0043413	macromolecule glycosylation	biological_process	0.42798	1	5	702	111	20361	1.01123e+44
GO:0005516	calmodulin binding	molecular_function	0.42915	1	2	702	39	20361	1.01112e+17
GO:0048309	endoplasmic reticulum inheritance	biological_process	0.42996	1	1	702	13	20361	101114034
GO:0007205	protein kinase C-activating G-protein coupled receptor signaling pathway	biological_process	0.43028	1	1	702	11	20361	101108320
GO:0051640	organelle localization	biological_process	0.43271	1	1	702	12	20361	101119564
GO:0051656	establishment of organelle localization	biological_process	0.43271	1	1	702	12	20361	101119564
GO:0007020	microtubule nucleation	biological_process	0.43364	1	1	702	13	20361	101107863
GO:0010968	regulation of microtubule nucleation	biological_process	0.43364	1	1	702	13	20361	101107863
GO:0090063	positive regulation of microtubule nucleation	biological_process	0.43364	1	1	702	13	20361	101107863
GO:0051259	protein oligomerization	biological_process	0.43525	1	5	702	125	20361	1.01115e+44
GO:0004143	diacylglycerol kinase activity	molecular_function	0.43612	1	1	702	12	20361	101108320
GO:0000075	cell cycle checkpoint	biological_process	0.43691	1	2	702	48	20361	1.01106e+17
GO:0006541	glutamine metabolic process	biological_process	0.43712	1	1	702	15	20361	101103276
GO:0006470	protein dephosphorylation	biological_process	0.43829	1	6	702	119	20361	1.01102e+53
GO:0048878	chemical homeostasis	biological_process	0.43998	1	3	702	98	20361	1.01121e+26
GO:0046039	GTP metabolic process	biological_process	0.44183	1	2	702	32	20361	101117299443274
GO:0005667	transcription factor complex	cellular_component	0.44194	1	3	702	79	20361	4.43068e+23
GO:0009312	oligosaccharide biosynthetic process	biological_process	0.44208	1	2	702	40	20361	1.01115e+17
GO:0016591	DNA-directed RNA polymerase II, holoenzyme	cellular_component	0.44292	1	4	702	105	20361	1.01123e+32
GO:0010498	proteasomal protein catabolic process	biological_process	0.44537	1	1	702	15	20361	101102610
GO:0006278	RNA-dependent DNA replication	biological_process	0.44614	1	1	702	15	20361	101109405
GO:0030838	positive regulation of actin filament polymerization	biological_process	0.4468	1	1	702	20	20361	101119564
GO:0031334	positive regulation of protein complex assembly	biological_process	0.4468	1	1	702	20	20361	101119564
GO:0032273	positive regulation of protein polymerization	biological_process	0.4468	1	1	702	20	20361	101119564
GO:0034314	Arp2/3 complex-mediated actin nucleation	biological_process	0.4468	1	1	702	20	20361	101119564
GO:0045010	actin nucleation	biological_process	0.4468	1	1	702	20	20361	101119564
GO:0006325	chromatin organization	biological_process	0.44755	1	5	702	129	20361	1.01115e+44
GO:0015985	energy coupled proton transport, down electrochemical gradient	biological_process	0.44786	1	3	702	82	20361	1.01103e+26
GO:0015986	ATP synthesis coupled proton transport	biological_process	0.44786	1	3	702	82	20361	1.01103e+26
GO:0006732	coenzyme metabolic process	biological_process	0.44857	1	5	702	105	20361	1.01108e+44
GO:1901988	negative regulation of cell cycle phase transition	biological_process	0.44903	1	2	702	50	20361	1.01109e+17
GO:0015995	chlorophyll biosynthetic process	biological_process	0.4514	1	1	702	14	20361	101103795
GO:0051345	positive regulation of hydrolase activity	biological_process	0.45248	1	1	702	13	20361	443274
GO:0005096	GTPase activator activity	molecular_function	0.45264	1	4	702	83	20361	1.01122e+32
GO:0051861	glycolipid binding	molecular_function	0.45296	1	1	702	14	20361	101120756
GO:0019898	extrinsic to membrane	cellular_component	0.45432	1	4	702	85	20361	1.01112e+35
GO:0031023	microtubule organizing center organization	biological_process	0.45501	1	2	702	35	20361	1.01116e+17
GO:0008176	tRNA (guanine-N7-)-methyltransferase activity	molecular_function	0.45516	1	1	702	16	20361	101122281
GO:0016049	cell growth	biological_process	0.4552	1	1	702	24	20361	101109099
GO:0002253	activation of immune response	biological_process	0.45637	1	1	702	18	20361	101107646
GO:0007217	tachykinin receptor signaling pathway	biological_process	0.45808	1	1	702	18	20361	101115877
GO:0006858	extracellular transport	biological_process	0.46094	1	1	702	21	20361	101119442
GO:0044743	intracellular protein transmembrane import	biological_process	0.46256	1	1	702	17	20361	101109149
GO:0065002	intracellular protein transmembrane transport	biological_process	0.46256	1	1	702	17	20361	101109149
GO:0008092	cytoskeletal protein binding	molecular_function	0.46334	1	21	702	502	20361	1.01107e+188
GO:0009132	nucleoside diphosphate metabolic process	biological_process	0.46384	1	1	702	15	20361	101107321
GO:0070588	calcium ion transmembrane transport	biological_process	0.46395	1	1	702	12	20361	101118500
GO:0016776	phosphotransferase activity, phosphate group as acceptor	molecular_function	0.46472	1	5	702	156	20361	1.01109e+44
GO:0006749	glutathione metabolic process	biological_process	0.46525	1	1	702	15	20361	101114822
GO:0006518	peptide metabolic process	biological_process	0.46546	1	2	702	41	20361	1.01123e+17
GO:0034062	RNA polymerase activity	molecular_function	0.46549	1	11	702	288	20361	1.01115e+98
GO:0005342	organic acid transmembrane transporter activity	molecular_function	0.46571	1	3	702	78	20361	1.01121e+26
GO:0046943	carboxylic acid transmembrane transporter activity	molecular_function	0.46571	1	3	702	78	20361	1.01121e+26
GO:0005227	calcium activated cation channel activity	molecular_function	0.46729	1	2	702	32	20361	1.01112e+17
GO:0015269	calcium-activated potassium channel activity	molecular_function	0.46729	1	2	702	32	20361	1.01112e+17
GO:0046961	proton-transporting ATPase activity, rotational mechanism	molecular_function	0.46738	1	1	702	18	20361	101104156
GO:0031589	cell-substrate adhesion	biological_process	0.46805	1	1	702	12	20361	101119564
GO:0006464	cellular protein modification process	biological_process	0.4686	1	57	702	1419	20361	101110314,101107989,101107709,101104486,101104544,101120630,101116625,101105030,101102265,101112408,101107425,101115612,101114291,101113261,101104227,101107891,101102402,101118505,101103590,105606759,101107438,101108264,101119067,101104881,101105074,101102513,101121483,101110391,101102311,101105428,101113256,443010,100913159,100037702,101119989,101107789,101118973,101123350,101109302,105616317,10…
GO:0036211	protein modification process	biological_process	0.4686	1	57	702	1419	20361	101110314,101107989,101107709,101104486,101104544,101120630,101116625,101102265,101105030,101107425,101112408,101115612,101114291,101113261,101104227,101107891,101102402,101118505,101103590,105606759,101107438,101108264,101119067,101105074,101104881,101102513,101102311,101110391,101121483,101105428,101113256,443010,100037702,100913159,101107789,101119989,101118973,101123350,101109302,105616317,10…
GO:0005164	tumor necrosis factor receptor binding	molecular_function	0.46903	1	1	702	20	20361	101105074
GO:0032813	tumor necrosis factor receptor superfamily binding	molecular_function	0.46903	1	1	702	20	20361	101105074
GO:0031329	regulation of cellular catabolic process	biological_process	0.46978	1	6	702	130	20361	4.43274e+50
GO:0009311	oligosaccharide metabolic process	biological_process	0.47006	1	2	702	42	20361	1.01111e+17
GO:0007131	reciprocal meiotic recombination	biological_process	0.47196	1	1	702	16	20361	101109113
GO:0035825	reciprocal DNA recombination	biological_process	0.47196	1	1	702	16	20361	101109113
GO:0006206	pyrimidine nucleobase metabolic process	biological_process	0.47289	1	1	702	15	20361	443440
GO:0019856	pyrimidine nucleobase biosynthetic process	biological_process	0.47289	1	1	702	15	20361	443440
GO:0006334	nucleosome assembly	biological_process	0.47317	1	2	702	62	20361	1.01115e+17
GO:0031497	chromatin assembly	biological_process	0.47317	1	2	702	62	20361	1.01105e+17
GO:0034728	nucleosome organization	biological_process	0.47317	1	2	702	62	20361	1.01115e+17
GO:0009288	bacterial-type flagellum	cellular_component	0.4737	1	2	702	45	20361	1.01113e+17
GO:0046915	transition metal ion transmembrane transporter activity	molecular_function	0.4741	1	5	702	138	20361	1.01108e+44
GO:0009245	lipid A biosynthetic process	biological_process	0.47443	1	1	702	20	20361	101114682
GO:0046493	lipid A metabolic process	biological_process	0.47443	1	1	702	20	20361	101114682
GO:1901269	lipooligosaccharide metabolic process	biological_process	0.47443	1	1	702	20	20361	101114682
GO:1901271	lipooligosaccharide biosynthetic process	biological_process	0.47443	1	1	702	20	20361	101114682
GO:0006140	regulation of nucleotide metabolic process	biological_process	0.47498	1	2	702	35	20361	101117299443274
GO:0009118	regulation of nucleoside metabolic process	biological_process	0.47498	1	2	702	35	20361	101117299443274
GO:0030811	regulation of nucleotide catabolic process	biological_process	0.47498	1	2	702	35	20361	443274101117299
GO:0033121	regulation of purine nucleotide catabolic process	biological_process	0.47498	1	2	702	35	20361	443274101117299
GO:1900542	regulation of purine nucleotide metabolic process	biological_process	0.47498	1	2	702	35	20361	443274101117299
GO:0030163	protein catabolic process	biological_process	0.47517	1	5	702	132	20361	1.01104e+44
GO:0004180	carboxypeptidase activity	molecular_function	0.4755	1	2	702	31	20361	1.01107e+17
GO:0001907	killing by symbiont of host cells	biological_process	0.47563	1	1	702	13	20361	101120756
GO:0044004	disruption by symbiont of host cell	biological_process	0.47563	1	1	702	13	20361	101120756
GO:0003887	DNA-directed DNA polymerase activity	molecular_function	0.47567	1	4	702	100	20361	1.0111e+35
GO:0016593	Cdc73/Paf1 complex	cellular_component	0.47601	1	1	702	16	20361	101123350
GO:0044179	hemolysis in other organism	biological_process	0.47606	1	1	702	13	20361	101120756
GO:0051715	cytolysis in other organism	biological_process	0.47606	1	1	702	13	20361	101120756
GO:0051128	regulation of cellular component organization	biological_process	0.47678	1	6	702	173	20361	1.0112e+53
GO:0044769	ATPase activity, coupled to transmembrane movement of ions, rotational mechanism	molecular_function	0.4768	1	1	702	19	20361	101104156
GO:0007155	cell adhesion	biological_process	0.47723	1	16	702	388	20361	1.01114e+143
GO:0042710	biofilm formation	biological_process	0.47833	1	1	702	20	20361	101102897
GO:0015849	organic acid transport	biological_process	0.47874	1	4	702	115	20361	1.01113e+35
GO:0046942	carboxylic acid transport	biological_process	0.47874	1	4	702	115	20361	1.01121e+35
GO:0051205	protein insertion into membrane	biological_process	0.47874	1	1	702	20	20361	101108178
GO:0051668	localization within membrane	biological_process	0.47874	1	1	702	20	20361	101108178
GO:0032886	regulation of microtubule-based process	biological_process	0.47875	1	2	702	43	20361	1.01115e+17
GO:0070507	regulation of microtubule cytoskeleton organization	biological_process	0.47875	1	2	702	43	20361	1.01115e+17
GO:0016337	cell-cell adhesion	biological_process	0.48013	1	5	702	122	20361	1.01123e+44
GO:0034061	DNA polymerase activity	molecular_function	0.48034	1	5	702	126	20361	1.0111e+44
GO:0006511	ubiquitin-dependent protein catabolic process	biological_process	0.48121	1	4	702	99	20361	1.01117e+35
GO:0071103	DNA conformation change	biological_process	0.48208	1	5	702	137	20361	1.01114e+44
GO:1901566	organonitrogen compound biosynthetic process	biological_process	0.48216	1	20	702	516	20361	1.01106e+176
GO:0009101	glycoprotein biosynthetic process	biological_process	0.48217	1	5	702	118	20361	1.01105e+44
GO:0048609	multicellular organismal reproductive process	biological_process	0.48361	1	5	702	127	20361	4.43189e+38
GO:0019941	modification-dependent protein catabolic process	biological_process	0.48514	1	4	702	100	20361	1.01111e+35
GO:0043632	modification-dependent macromolecule catabolic process	biological_process	0.48514	1	4	702	100	20361	1.01103e+35
GO:0051818	disruption of cells of other organism involved in symbiotic interaction	biological_process	0.48592	1	1	702	14	20361	101120756
GO:0051883	killing of cells in other organism involved in symbiotic interaction	biological_process	0.48592	1	1	702	14	20361	101120756
GO:0000090	mitotic anaphase	biological_process	0.48742	1	1	702	19	20361	101114878
GO:0051322	anaphase	biological_process	0.48742	1	1	702	19	20361	101114878
GO:0010948	negative regulation of cell cycle process	biological_process	0.48881	1	2	702	52	20361	1.01106e+17
GO:0009108	coenzyme biosynthetic process	biological_process	0.48935	1	4	702	87	20361	1.00137e+35
GO:0004721	phosphoprotein phosphatase activity	molecular_function	0.49154	1	6	702	132	20361	1.01102e+53
GO:0007610	behavior	biological_process	0.49215	1	2	702	44	20361	443189443053
GO:0040008	regulation of growth	biological_process	0.49281	1	1	702	26	20361	101109099
GO:0030518	intracellular steroid hormone receptor signaling pathway	biological_process	0.49299	1	1	702	17	20361	443412
GO:0030522	intracellular receptor signaling pathway	biological_process	0.49299	1	1	702	17	20361	443412
GO:0006171	cAMP biosynthetic process	biological_process	0.49307	1	1	702	12	20361	101122401
GO:0017038	protein import	biological_process	0.49312	1	6	702	167	20361	1.01109e+53
GO:0016192	vesicle-mediated transport	biological_process	0.49319	1	16	702	395	20361	1.01104e+143
GO:0044770	cell cycle phase transition	biological_process	0.49359	1	2	702	56	20361	1.01109e+17
GO:1901987	regulation of cell cycle phase transition	biological_process	0.49359	1	2	702	56	20361	1.01106e+17
GO:0006333	chromatin assembly or disassembly	biological_process	0.49428	1	2	702	66	20361	1.01115e+17
GO:0008514	organic anion transmembrane transporter activity	molecular_function	0.49495	1	3	702	80	20361	1.01121e+26
GO:0005057	receptor signaling protein activity	molecular_function	0.49526	1	1	702	13	20361	101107438
GO:0006195	purine nucleotide catabolic process	biological_process	0.49686	1	2	702	36	20361	443274101117299
GO:0072523	purine-containing compound catabolic process	biological_process	0.49686	1	2	702	36	20361	443274101117299
GO:0022610	biological adhesion	biological_process	0.49756	1	16	702	396	20361	1.01123e+143
GO:0003810	protein-glutamine gamma-glutamyltransferase activity	molecular_function	0.49878	1	1	702	16	20361	101102265
GO:0043043	peptide biosynthetic process	biological_process	0.49914	1	1	702	15	20361	101114822
GO:0000988	protein binding transcription factor activity	molecular_function	0.49972	1	9	702	230	20361	1.01112e+80
GO:0000428	DNA-directed RNA polymerase complex	cellular_component	0.50052	1	4	702	113	20361	1.01115e+32
GO:0030880	RNA polymerase complex	cellular_component	0.50052	1	4	702	113	20361	4.43068e+32
GO:0055029	nuclear DNA-directed RNA polymerase complex	cellular_component	0.50052	1	4	702	113	20361	1.01123e+32
GO:0008237	metallopeptidase activity	molecular_function	0.50073	1	10	702	223	20361	1.01103e+89
GO:0009100	glycoprotein metabolic process	biological_process	0.50111	1	5	702	120	20361	1.01123e+44
GO:0009112	nucleobase metabolic process	biological_process	0.50232	1	1	702	17	20361	443440
GO:0046112	nucleobase biosynthetic process	biological_process	0.50232	1	1	702	17	20361	443440
GO:0044724	single-organism carbohydrate catabolic process	biological_process	0.50305	1	2	702	51	20361	443440101115891
GO:0015711	organic anion transport	biological_process	0.50334	1	4	702	117	20361	1.01113e+35
GO:0007167	enzyme linked receptor protein signaling pathway	biological_process	0.50338	1	2	702	34	20361	1.0112e+17
GO:0007169	transmembrane receptor protein tyrosine kinase signaling pathway	biological_process	0.50338	1	2	702	34	20361	1.01116e+17
GO:0019201	nucleotide kinase activity	molecular_function	0.50381	1	5	702	159	20361	1.01113e+44
GO:0009117	nucleotide metabolic process	biological_process	0.5047	1	11	702	297	20361	1.01122e+95
GO:0043231	intracellular membrane-bounded organelle	cellular_component	0.50541	1	107	702	2999	20361	101108762,101106986,101122806,101117032,101123350,101111845,101111278,101119906,101102901,101108200,101116309,101112880,101101892,101116194,101105452,101104131,101114241,101109515,101108732,101122281,101122913,101122655,443513,101120976,101117137,101112662,101102402,100125358,101119170,101108584,101106620,101104118,101114511,101118097,101108178,101102133,105602103,443068,101110805,101110391,10111…
GO:0005507	copper ion binding	molecular_function	0.50638	1	3	702	83	20361	1.01113e+23
GO:0010035	response to inorganic substance	biological_process	0.50669	1	2	702	37	20361	1.01109e+17
GO:0032324	molybdopterin cofactor biosynthetic process	biological_process	0.50703	1	1	702	13	20361	101108067
GO:0043545	molybdopterin cofactor metabolic process	biological_process	0.50703	1	1	702	13	20361	101108067
GO:0043227	membrane-bounded organelle	cellular_component	0.50828	1	107	702	3000	20361	101117032,101123350,101108762,101122806,101106986,101116309,101108200,101102901,101119906,101111278,101111845,101116194,101101892,101104131,101105452,101112880,101108732,101122281,101122655,101122913,101114241,101109515,101112662,101102402,100125358,443513,101120976,101117137,101114511,101104118,101108178,101118097,101106620,101119170,101108584,443068,101110805,101110391,105602103,101121829,10111…
GO:0032065	cortical protein anchoring	biological_process	0.50898	1	1	702	13	20361	101121946
GO:0051220	cytoplasmic sequestering of protein	biological_process	0.50898	1	1	702	13	20361	101121946
GO:0051224	negative regulation of protein transport	biological_process	0.50898	1	1	702	13	20361	101121946
GO:0044255	cellular lipid metabolic process	biological_process	0.50916	1	12	702	304	20361	1.01108e+104
GO:0015718	monocarboxylic acid transport	biological_process	0.50989	1	1	702	23	20361	101112165
GO:0008009	chemokine activity	molecular_function	0.51026	1	1	702	41	20361	101120186
GO:0042379	chemokine receptor binding	molecular_function	0.51026	1	1	702	41	20361	101120186
GO:0044000	movement in host	biological_process	0.51079	1	1	702	20	20361	101105473
GO:0046739	spread of virus in multicellular host	biological_process	0.51079	1	1	702	20	20361	101105473
GO:0046740	spread of virus in host, cell to cell	biological_process	0.51079	1	1	702	20	20361	101105473
GO:0051814	movement in other organism involved in symbiotic interaction	biological_process	0.51079	1	1	702	20	20361	101105473
GO:0009405	pathogenesis	biological_process	0.51097	1	17	702	442	20361	1.01115e+149
GO:0065003	macromolecular complex assembly	biological_process	0.51117	1	19	702	536	20361	1.01121e+170
GO:0048308	organelle inheritance	biological_process	0.51137	1	1	702	16	20361	101114034
GO:0000154	rRNA modification	biological_process	0.51184	1	1	702	17	20361	443274
GO:0031167	rRNA methylation	biological_process	0.51184	1	1	702	17	20361	443274
GO:0071822	protein complex subunit organization	biological_process	0.51225	1	18	702	504	20361	1.01121e+161
GO:0044463	cell projection part	cellular_component	0.51251	1	1	702	19	20361	101112662
GO:0043549	regulation of kinase activity	biological_process	0.51368	1	1	702	15	20361	101102973
GO:0045859	regulation of protein kinase activity	biological_process	0.51368	1	1	702	15	20361	101102973
GO:0051338	regulation of transferase activity	biological_process	0.51368	1	1	702	15	20361	101102973
GO:0005753	mitochondrial proton-transporting ATP synthase complex	cellular_component	0.51559	1	2	702	58	20361	1.01106e+17
GO:0034655	nucleobase-containing compound catabolic process	biological_process	0.51676	1	4	702	87	20361	1.01102e+32
GO:0019033	viral tegument	cellular_component	0.51737	1	1	702	18	20361	101108178
GO:0051920	peroxiredoxin activity	molecular_function	0.51757	1	1	702	22	20361	101106703
GO:0032040	small-subunit processome	cellular_component	0.51879	1	3	702	80	20361	1.0111e+26
GO:0016011	dystroglycan complex	cellular_component	0.52003	1	1	702	17	20361	101113427
GO:0016012	sarcoglycan complex	cellular_component	0.52003	1	1	702	17	20361	101113427
GO:0030976	thiamine pyrophosphate binding	molecular_function	0.52078	1	1	702	21	20361	101120867
GO:0051493	regulation of cytoskeleton organization	biological_process	0.52123	1	3	702	80	20361	1.01115e+26
GO:0004114	3',5'-cyclic-nucleotide phosphodiesterase activity	molecular_function	0.52131	1	2	702	32	20361	1.01119e+17
GO:0000746	conjugation	biological_process	0.52142	1	1	702	22	20361	101112880
GO:0003964	RNA-directed DNA polymerase activity	molecular_function	0.52194	1	1	702	18	20361	101109405
GO:0009165	nucleotide biosynthetic process	biological_process	0.52302	1	8	702	220	20361	1.01108e+71
GO:1901293	nucleoside phosphate biosynthetic process	biological_process	0.52302	1	8	702	220	20361	1.01122e+71
GO:0002684	positive regulation of immune system process	biological_process	0.5234	1	1	702	24	20361	101107646
GO:0050778	positive regulation of immune response	biological_process	0.5234	1	1	702	24	20361	101107646
GO:0006720	isoprenoid metabolic process	biological_process	0.52502	1	2	702	44	20361	1.01122e+17
GO:0008299	isoprenoid biosynthetic process	biological_process	0.52502	1	2	702	44	20361	1.01119e+17
GO:0003006	developmental process involved in reproduction	biological_process	0.52669	1	3	702	79	20361	1.01104e+26
GO:0046058	cAMP metabolic process	biological_process	0.52681	1	1	702	13	20361	101122401
GO:0015459	potassium channel regulator activity	molecular_function	0.52684	1	1	702	18	20361	101115490
GO:0019870	potassium channel inhibitor activity	molecular_function	0.52684	1	1	702	18	20361	101115490
GO:1901068	guanosine-containing compound metabolic process	biological_process	0.52697	1	2	702	38	20361	101117299443274
GO:0005665	DNA-directed RNA polymerase II, core complex	cellular_component	0.52715	1	1	702	23	20361	101114511
GO:0015097	mercury ion transmembrane transporter activity	molecular_function	0.52716	1	1	702	15	20361	101108667
GO:0015694	mercury ion transport	biological_process	0.52716	1	1	702	15	20361	101108667
GO:0046689	response to mercury ion	biological_process	0.52716	1	1	702	15	20361	101108667
GO:0050787	detoxification of mercury ion	biological_process	0.52716	1	1	702	15	20361	101108667
GO:0010562	positive regulation of phosphorus metabolic process	biological_process	0.52753	1	1	702	16	20361	101113261
GO:0031401	positive regulation of protein modification process	biological_process	0.52753	1	1	702	16	20361	101113261
GO:0045937	positive regulation of phosphate metabolic process	biological_process	0.52753	1	1	702	16	20361	101113261
GO:0005200	structural constituent of cytoskeleton	molecular_function	0.52779	1	1	702	20	20361	101104867
GO:0044237	cellular metabolic process	biological_process	0.5281	1	250	702	7223	20361	443068,101112525,100169936,101117084,101107495,101106544,101104156,101106170,101104902,101110686,101107483,101107438,101106341,101111207,101102402,101113261,443513,101120976,101114291,101114511,101117901,101104118,105615177,101118097,101113687,101117299,101107989,101119170,101113262,101116194,101108256,101104131,101111299,101113223,101122281,100642179,101119564,101108732,101120982,101122655,10110…
GO:0003918	DNA topoisomerase type II (ATP-hydrolyzing) activity	molecular_function	0.52833	1	1	702	20	20361	101108762
GO:0061505	DNA topoisomerase II activity	molecular_function	0.52833	1	1	702	20	20361	101108762
GO:0006396	RNA processing	biological_process	0.52961	1	18	702	498	20361	1.01109e+155
GO:0042254	ribosome biogenesis	biological_process	0.53074	1	4	702	122	20361	1.01109e+32
GO:0004016	adenylate cyclase activity	molecular_function	0.53517	1	1	702	14	20361	101122401
GO:0005911	cell-cell junction	cellular_component	0.53632	1	1	702	22	20361	101105473
GO:0071840	cellular component organization or biogenesis	biological_process	0.53645	1	61	702	1727	20361	101107863,101108973,101121782,101115361,101115490,101102663,101121788,101118097,101108178,101120517,101116625,101116835,101107392,101117084,101114878,101115356,101118949,443068,101110805,101120756,101111207,106990980,101102623,101115833,101107438,101120495,101117047,101123485,101110526,101102193,101109099,101123350,101116170,101118475,105616317,101109149,101110938,101105428,101111593,101114112,10…
GO:0009975	cyclase activity	molecular_function	0.53675	1	2	702	40	20361	1.01122e+17
GO:0043933	macromolecular complex subunit organization	biological_process	0.53753	1	20	702	583	20361	4.43068e+176
GO:0009607	response to biotic stimulus	biological_process	0.5376	1	8	702	214	20361	1.01105e+71
GO:0009110	vitamin biosynthetic process	biological_process	0.53788	1	2	702	44	20361	1.01114e+17
GO:0042364	water-soluble vitamin biosynthetic process	biological_process	0.53788	1	2	702	44	20361	1.01105e+17
GO:0032504	multicellular organism reproduction	biological_process	0.53788	1	5	702	137	20361	1.05604e+38
GO:0044425	membrane part	cellular_component	0.53795	1	144	702	4795	20361	101104040,101110415,101105618,101116716,101123028,101113888,101109271,101108803,101109405,101103929,101114431,101108183,101111593,101109535,101110938,101109494,101121279,101114392,101114909,101104424,101117047,101101882,101106127,101113787,101105473,101113487,105612572,106991784,101105655,780473,101116928,101123504,101110314,101111828,101114434,101118936,101108467,105605902,101112056,101114869,10…
GO:0016597	amino acid binding	molecular_function	0.53988	1	1	702	17	20361	101112542
GO:1901136	carbohydrate derivative catabolic process	biological_process	0.54148	1	3	702	66	20361	4.43274e+23
GO:0051189	prosthetic group metabolic process	biological_process	0.54305	1	1	702	16	20361	101108067
GO:0034702	ion channel complex	cellular_component	0.54307	1	2	702	39	20361	1.01103e+17
GO:0034703	cation channel complex	cellular_component	0.54307	1	2	702	39	20361	1.01103e+17
GO:0004198	calcium-dependent cysteine-type endopeptidase activity	molecular_function	0.54339	1	1	702	16	20361	101104136
GO:0051239	regulation of multicellular organismal process	biological_process	0.54362	1	5	702	120	20361	1.01121e+44
GO:0006766	vitamin metabolic process	biological_process	0.54453	1	2	702	45	20361	1.01105e+17
GO:0006767	water-soluble vitamin metabolic process	biological_process	0.54453	1	2	702	45	20361	1.01105e+17
GO:0008289	lipid binding	molecular_function	0.54587	1	11	702	279	20361	1.01107e+95
GO:0016197	endosomal transport	biological_process	0.54593	1	1	702	16	20361	101119564
GO:0060590	ATPase regulator activity	molecular_function	0.5464	1	2	702	53	20361	1.00125e+17
GO:0010506	regulation of autophagy	biological_process	0.54658	1	4	702	94	20361	1.01114e+35
GO:0000103	sulfate assimilation	biological_process	0.5482	1	1	702	17	20361	101112460
GO:0004020	adenylylsulfate kinase activity	molecular_function	0.5482	1	1	702	17	20361	101112460
GO:0070585	protein localization to mitochondrion	biological_process	0.54912	1	1	702	22	20361	101108178
GO:0072655	establishment of protein localization to mitochondrion	biological_process	0.54912	1	1	702	22	20361	101108178
GO:0043412	macromolecule modification	biological_process	0.54977	1	60	702	1547	20361	101108264,101119067,101105074,101104881,101102513,101102311,101110391,101121483,101103590,105606759,101107438,101112408,101105030,101107425,101102265,101115612,101114291,101113261,101104227,101107891,101102402,101118505,101110314,101107989,101104486,101107709,101104544,101120630,101116625,101115582,101111779,101111299,101101909,101122941,101116201,101111867,101102973,101107196,101102157,101103425…
GO:0030684	preribosome	cellular_component	0.55159	1	3	702	87	20361	1.0111e+26
GO:0016714	oxidoreductase activity, acting on paired donors, with incorporation or reduction of molecular oxygen, reduced pteridine as one donor, and incorporation of one atom of oxygen	molecular_function	0.552	1	1	702	19	20361	101102402
GO:0005787	signal peptidase complex	cellular_component	0.5548	1	1	702	22	20361	101122806
GO:0006465	signal peptide processing	biological_process	0.5548	1	1	702	22	20361	101122806
GO:0000940	condensed chromosome outer kinetochore	cellular_component	0.55594	1	3	702	87	20361	1.01114e+26
GO:0030269	tetrahydromethanopterin S-methyltransferase activity	molecular_function	0.5562	1	1	702	16	20361	100135687
GO:0042086	5-methyl-5,6,7,8-tetrahydromethanopterin-dependent methyltransferase activity	molecular_function	0.5562	1	1	702	16	20361	100135687
GO:0045263	proton-transporting ATP synthase complex, coupling factor F(o)	cellular_component	0.55954	1	2	702	60	20361	1.01106e+17
GO:0016836	hydro-lyase activity	molecular_function	0.55955	1	3	702	81	20361	1.01108e+26
GO:0022843	voltage-gated cation channel activity	molecular_function	0.55976	1	4	702	100	20361	1.0112e+35
GO:0051129	negative regulation of cellular component organization	biological_process	0.56046	1	2	702	56	20361	1.0112e+17
GO:0004488	methylenetetrahydrofolate dehydrogenase (NADP+) activity	molecular_function	0.56104	1	1	702	18	20361	100137069
GO:0005669	transcription factor TFIID complex	cellular_component	0.56116	1	1	702	37	20361	101122655
GO:0044257	cellular protein catabolic process	biological_process	0.56179	1	4	702	119	20361	1.01104e+35
GO:0051603	proteolysis involved in cellular protein catabolic process	biological_process	0.56179	1	4	702	119	20361	1.01117e+35
GO:0015297	antiporter activity	molecular_function	0.56226	1	2	702	38	20361	1.01117e+17
GO:0019067	viral assembly, maturation, egress, and release	biological_process	0.56332	1	4	702	126	20361	1.01118e+35
GO:0016706	oxidoreductase activity, acting on paired donors, with incorporation or reduction of molecular oxygen, 2-oxoglutarate as one donor, and incorporation of one atom each of oxygen into both donors	molecular_function	0.56332	1	2	702	37	20361	1.01114e+17
GO:0032270	positive regulation of cellular protein metabolic process	biological_process	0.56334	1	1	702	20	20361	101113261
GO:0051247	positive regulation of protein metabolic process	biological_process	0.56334	1	1	702	20	20361	101113261
GO:0005125	cytokine activity	molecular_function	0.5635	1	2	702	78	20361	1.0112e+17
GO:0046434	organophosphate catabolic process	biological_process	0.56441	1	3	702	69	20361	1.01117e+23
GO:0042180	cellular ketone metabolic process	biological_process	0.56506	1	1	702	22	20361	101107196
GO:0008137	NADH dehydrogenase (ubiquinone) activity	molecular_function	0.566	1	2	702	50	20361	1.0111e+17
GO:0050136	NADH dehydrogenase (quinone) activity	molecular_function	0.566	1	2	702	50	20361	1.0111e+17
GO:0033692	cellular polysaccharide biosynthetic process	biological_process	0.56678	1	1	702	22	20361	101116835
GO:0006032	chitin catabolic process	biological_process	0.56749	1	1	702	18	20361	101108067
GO:0046348	amino sugar catabolic process	biological_process	0.56749	1	1	702	18	20361	101108067
GO:1901072	glucosamine-containing compound catabolic process	biological_process	0.56749	1	1	702	18	20361	101108067
GO:0016846	carbon-sulfur lyase activity	molecular_function	0.56913	1	1	702	25	20361	101114233
GO:0048870	cell motility	biological_process	0.56989	1	5	702	138	20361	1.01115e+44
GO:0051674	localization of cell	biological_process	0.56989	1	5	702	138	20361	1.0112e+44
GO:0045735	nutrient reservoir activity	molecular_function	0.5707	1	1	702	23	20361	101115197
GO:0003873	6-phosphofructo-2-kinase activity	molecular_function	0.5707	1	1	702	27	20361	101116538
GO:0006000	fructose metabolic process	biological_process	0.5707	1	1	702	27	20361	101116538
GO:0006006	glucose metabolic process	biological_process	0.57122	1	2	702	51	20361	101115891443440
GO:0005819	spindle	cellular_component	0.57167	1	4	702	114	20361	1.01114e+35
GO:0006418	tRNA aminoacylation for protein translation	biological_process	0.57173	1	3	702	76	20361	1.0112e+26
GO:0070851	growth factor receptor binding	molecular_function	0.57175	1	1	702	28	20361	101122496
GO:0008047	enzyme activator activity	molecular_function	0.57227	1	4	702	105	20361	1.01112e+32
GO:0090407	organophosphate biosynthetic process	biological_process	0.57541	1	12	702	336	20361	1.01104e+107
GO:0030119	AP-type membrane coat adaptor complex	cellular_component	0.57735	1	1	702	22	20361	101104002
GO:0008094	DNA-dependent ATPase activity	molecular_function	0.57751	1	2	702	55	20361	1.01109e+17
GO:0006364	rRNA processing	biological_process	0.57811	1	3	702	91	20361	4.43274e+23
GO:0016072	rRNA metabolic process	biological_process	0.57811	1	3	702	91	20361	1.01112e+23
GO:0019068	virion assembly	biological_process	0.5786	1	3	702	103	20361	1.01118e+26
GO:0042030	ATPase inhibitor activity	molecular_function	0.57944	1	1	702	21	20361	100125358
GO:0030983	mismatched DNA binding	molecular_function	0.57978	1	1	702	19	20361	101119199
GO:0009512	cytochrome b6f complex	cellular_component	0.57989	1	1	702	27	20361	101113274
GO:0031640	killing of cells of other organism	biological_process	0.58036	1	1	702	19	20361	101120756
GO:0044364	disruption of cells of other organism	biological_process	0.58036	1	1	702	19	20361	101120756
GO:0071806	protein transmembrane transport	biological_process	0.58062	1	1	702	23	20361	101109149
GO:0055036	virion membrane	cellular_component	0.58076	1	1	702	20	20361	101123469
GO:0009187	cyclic nucleotide metabolic process	biological_process	0.58104	1	2	702	39	20361	1.01102e+17
GO:0006891	intra-Golgi vesicle-mediated transport	biological_process	0.58118	1	2	702	47	20361	1.01103e+17
GO:0000394	RNA splicing, via endonucleolytic cleavage and ligation	biological_process	0.5821	1	1	702	16	20361	101116625
GO:0006388	tRNA splicing, via endonucleolytic cleavage and ligation	biological_process	0.5821	1	1	702	16	20361	101116625
GO:0044238	primary metabolic process	biological_process	0.58305	1	261	702	7653	20361	101103795,101115254,105605100,101119906,101116328,101111845,101118863,101121620,101110667,101122334,101107321,101120982,101107106,101122655,101113223,101122281,101119564,101108732,101109515,105611834,101102100,101104131,101116194,101108256,101108178,105615177,101104118,101117901,101117299,101107989,101119170,443513,101114291,101107438,101106341,101106170,101104902,101107483,101112525,101109713,10…
GO:0015672	monovalent inorganic cation transport	biological_process	0.58305	1	16	702	430	20361	1.01113e+140
GO:0005086	ARF guanyl-nucleotide exchange factor activity	molecular_function	0.58423	1	1	702	17	20361	101110972
GO:0032011	ARF protein signal transduction	biological_process	0.58423	1	1	702	17	20361	101110972
GO:0032012	regulation of ARF protein signal transduction	biological_process	0.58423	1	1	702	17	20361	101110972
GO:0005213	structural constituent of chorion	molecular_function	0.58617	1	2	702	57	20361	1.01104e+17
GO:0007292	female gamete generation	biological_process	0.58617	1	2	702	57	20361	1.05604e+17
GO:0007304	chorion-containing eggshell formation	biological_process	0.58617	1	2	702	57	20361	1.01104e+17
GO:0030703	eggshell formation	biological_process	0.58617	1	2	702	57	20361	1.01104e+17
GO:0030707	ovarian follicle cell development	biological_process	0.58617	1	2	702	57	20361	1.05604e+17
GO:0048477	oogenesis	biological_process	0.58617	1	2	702	57	20361	1.05604e+17
GO:0005242	inward rectifier potassium channel activity	molecular_function	0.58623	1	1	702	25	20361	101112056
GO:0016668	oxidoreductase activity, acting on a sulfur group of donors, NAD(P) as acceptor	molecular_function	0.58657	1	3	702	78	20361	1.01108e+26
GO:0047134	protein-disulfide reductase activity	molecular_function	0.58657	1	3	702	78	20361	1.01107e+26
GO:0009396	folic acid-containing compound biosynthetic process	biological_process	0.58682	1	1	702	19	20361	100137069
GO:0016709	oxidoreductase activity, acting on paired donors, with incorporation or reduction of molecular oxygen, NAD(P)H as one donor, and incorporation of one atom of oxygen	molecular_function	0.58705	1	1	702	20	20361	101118975
GO:0006818	hydrogen transport	biological_process	0.5887	1	7	702	206	20361	1.01105e+62
GO:0015992	proton transport	biological_process	0.5887	1	7	702	206	20361	1.01123e+62
GO:0000989	transcription factor binding transcription factor activity	molecular_function	0.59106	1	7	702	195	20361	1.01112e+62
GO:0003712	transcription cofactor activity	molecular_function	0.59106	1	7	702	195	20361	1.01112e+62
GO:0016043	cellular component organization	biological_process	0.59127	1	56	702	1596	20361	101115263,101116309,101114034,101102681,101111593,101114112,101105428,101110938,101109149,105616317,101118475,101116170,101123350,101109099,101102193,101110526,101110248,101119564,101122281,101119442,101105792,101103123,101112636,101115253,101114241,101102395,101113427,101101892,101120843,101116625,101120517,101108178,101118097,101121788,101102663,101115361,101121782,101115490,101108973,101107863…
GO:0007156	homophilic cell adhesion	biological_process	0.59152	1	4	702	102	20361	1.05615e+35
GO:0016010	dystrophin-associated glycoprotein complex	cellular_component	0.59235	1	1	702	22	20361	101113427
GO:0045995	regulation of embryonic development	biological_process	0.59257	1	1	702	19	20361	101108973
GO:0006650	glycerophospholipid metabolic process	biological_process	0.59297	1	4	702	108	20361	1.01113e+32
GO:0016746	transferase activity, transferring acyl groups	molecular_function	0.59617	1	10	702	274	20361	1.01117e+89
GO:0005875	microtubule associated complex	cellular_component	0.59787	1	2	702	47	20361	1.01109e+17
GO:0006457	protein folding	biological_process	0.59792	1	4	702	151	20361	1.01104e+35
GO:0005544	calcium-dependent phospholipid binding	molecular_function	0.59816	1	1	702	22	20361	101107203
GO:0004222	metalloendopeptidase activity	molecular_function	0.59819	1	7	702	176	20361	1.01104e+62
GO:0003707	steroid hormone receptor activity	molecular_function	0.59985	1	1	702	22	20361	443412
GO:0016423	tRNA (guanine) methyltransferase activity	molecular_function	0.60254	1	1	702	24	20361	101122281
GO:0016879	ligase activity, forming carbon-nitrogen bonds	molecular_function	0.60353	1	11	702	272	20361	1.0111e+98
GO:0007094	mitotic spindle assembly checkpoint	biological_process	0.60386	1	1	702	28	20361	101108973
GO:0031577	spindle checkpoint	biological_process	0.60386	1	1	702	28	20361	101108973
GO:0045839	negative regulation of mitosis	biological_process	0.60386	1	1	702	28	20361	101108973
GO:0045841	negative regulation of mitotic metaphase/anaphase transition	biological_process	0.60386	1	1	702	28	20361	101108973
GO:0051784	negative regulation of nuclear division	biological_process	0.60386	1	1	702	28	20361	101108973
GO:0071173	spindle assembly checkpoint	biological_process	0.60386	1	1	702	28	20361	101108973
GO:0071174	mitotic spindle checkpoint	biological_process	0.60386	1	1	702	28	20361	101108973
GO:1902100	negative regulation of metaphase/anaphase transition of cell cycle	biological_process	0.60386	1	1	702	28	20361	101108973
GO:0051262	protein tetramerization	biological_process	0.60407	1	1	702	23	20361	101103123
GO:0046486	glycerolipid metabolic process	biological_process	0.60485	1	4	702	109	20361	1.0112e+32
GO:0042803	protein homodimerization activity	molecular_function	0.60522	1	4	702	128	20361	1.01114e+35
GO:0071554	cell wall organization or biogenesis	biological_process	0.60686	1	1	702	29	20361	101116804
GO:0031406	carboxylic acid binding	molecular_function	0.60741	1	1	702	21	20361	101112542
GO:0004659	prenyltransferase activity	molecular_function	0.60867	1	1	702	25	20361	101122279
GO:0032880	regulation of protein localization	biological_process	0.60902	1	1	702	18	20361	101121946
GO:0051223	regulation of protein transport	biological_process	0.60902	1	1	702	18	20361	101121946
GO:0070201	regulation of establishment of protein localization	biological_process	0.60902	1	1	702	18	20361	101121946
GO:0031109	microtubule polymerization or depolymerization	biological_process	0.60917	1	1	702	28	20361	101114878
GO:0031110	regulation of microtubule polymerization or depolymerization	biological_process	0.60917	1	1	702	28	20361	101114878
GO:0015291	secondary active transmembrane transporter activity	molecular_function	0.60974	1	4	702	95	20361	1.01108e+35
GO:0019013	viral nucleocapsid	cellular_component	0.61133	1	1	702	30	20361	101103590
GO:0031082	BLOC complex	cellular_component	0.61142	1	1	702	28	20361	101122265
GO:0031083	BLOC-1 complex	cellular_component	0.61142	1	1	702	28	20361	101122265
GO:0000922	spindle pole	cellular_component	0.61254	1	1	702	23	20361	101107863
GO:0030118	clathrin coat	cellular_component	0.61283	1	1	702	27	20361	101104002
GO:0010340	carboxyl-O-methyltransferase activity	molecular_function	0.6133	1	1	702	32	20361	100037702
GO:0051998	protein carboxyl O-methyltransferase activity	molecular_function	0.6133	1	1	702	32	20361	100037702
GO:0006366	transcription from RNA polymerase II promoter	biological_process	0.61336	1	9	702	262	20361	1.01112e+77
GO:0001906	cell killing	biological_process	0.61408	1	1	702	21	20361	101120756
GO:0019064	viral entry into host cell via membrane fusion with the plasma membrane	biological_process	0.61455	1	1	702	26	20361	101119442
GO:0007093	mitotic cell cycle checkpoint	biological_process	0.61493	1	1	702	30	20361	101108973
GO:0003724	RNA helicase activity	molecular_function	0.61666	1	3	702	79	20361	1.01113e+26
GO:0032268	regulation of cellular protein metabolic process	biological_process	0.61675	1	2	702	55	20361	1.01103e+17
GO:0022613	ribonucleoprotein complex biogenesis	biological_process	0.61831	1	4	702	131	20361	4.43274e+32
GO:0004435	phosphatidylinositol phospholipase C activity	molecular_function	0.61886	1	1	702	18	20361	101117580
GO:0004629	phospholipase C activity	molecular_function	0.61886	1	1	702	18	20361	101117580
GO:0000774	adenyl-nucleotide exchange factor activity	molecular_function	0.61888	1	1	702	31	20361	101104118
GO:0031683	G-protein beta/gamma-subunit complex binding	molecular_function	0.62024	1	3	702	110	20361	1.01113e+26
GO:0071705	nitrogen compound transport	biological_process	0.6225	1	6	702	183	20361	1.01114e+53
GO:0005326	neurotransmitter transporter activity	molecular_function	0.62259	1	1	702	24	20361	101108183
GO:0005328	neurotransmitter:sodium symporter activity	molecular_function	0.62259	1	1	702	24	20361	101108183
GO:0016811	hydrolase activity, acting on carbon-nitrogen (but not peptide) bonds, in linear amides	molecular_function	0.62535	1	1	702	29	20361	101114027
GO:0008276	protein methyltransferase activity	molecular_function	0.62597	1	2	702	61	20361	1.01115e+17
GO:0009081	branched-chain amino acid metabolic process	biological_process	0.62629	1	1	702	18	20361	101105233
GO:0009082	branched-chain amino acid biosynthetic process	biological_process	0.62629	1	1	702	18	20361	101105233
GO:0005496	steroid binding	molecular_function	0.6265	1	1	702	23	20361	443412
GO:0016782	transferase activity, transferring sulfur-containing groups	molecular_function	0.62788	1	3	702	82	20361	1.01104e+26
GO:0006026	aminoglycan catabolic process	biological_process	0.62796	1	1	702	25	20361	101108067
GO:1901991	negative regulation of mitotic cell cycle phase transition	biological_process	0.62853	1	1	702	32	20361	101108973
GO:0005672	transcription factor TFIIA complex	cellular_component	0.62919	1	1	702	23	20361	443068
GO:0007127	meiosis I	biological_process	0.62935	1	1	702	24	20361	101109113
GO:0016044	cellular membrane organization	biological_process	0.62947	1	4	702	112	20361	1.01117e+35
GO:0042559	pteridine-containing compound biosynthetic process	biological_process	0.62953	1	1	702	22	20361	100137069
GO:0006221	pyrimidine nucleotide biosynthetic process	biological_process	0.62997	1	1	702	29	20361	101103276
GO:0019076	viral release from host cell	biological_process	0.63001	1	1	702	23	20361	101118166
GO:0001522	pseudouridine synthesis	biological_process	0.63021	1	1	702	40	20361	101108732
GO:0008443	phosphofructokinase activity	molecular_function	0.6319	1	1	702	30	20361	101116538
GO:0033177	proton-transporting two-sector ATPase complex, proton-transporting domain	cellular_component	0.63238	1	4	702	126	20361	1.01114e+35
GO:0006261	DNA-dependent DNA replication	biological_process	0.6333	1	3	702	108	20361	1.0112e+26
GO:0019835	cytolysis	biological_process	0.63393	1	1	702	21	20361	101123125
GO:0043604	amide biosynthetic process	biological_process	0.63829	1	1	702	23	20361	101114822
GO:0045502	dynein binding	molecular_function	0.64024	1	3	702	100	20361	1.01109e+26
GO:0016747	transferase activity, transferring acyl groups other than amino-acyl groups	molecular_function	0.64063	1	6	702	177	20361	1.01118e+53
GO:0015994	chlorophyll metabolic process	biological_process	0.64093	1	1	702	26	20361	101103795
GO:1901564	organonitrogen compound metabolic process	biological_process	0.6435	1	34	702	967	20361	101119512,101122401,101113635,101104156,101113487,101118097,101113687,101111828,101117299,101118975,101121788,101104486,101104544,101114027,101105233,101118837,101107196,100137069,443274,101119442,101103126,101105618,101122150,101105203,101114822,101103795,443440,101108067,101102074,101107295,101121880,101103276,101122806,101107789
GO:0042398	cellular modified amino acid biosynthetic process	biological_process	0.64351	1	2	702	50	20361	1.01115e+17
GO:0019205	nucleobase-containing compound kinase activity	molecular_function	0.64439	1	5	702	180	20361	1.01109e+44
GO:0008172	S-methyltransferase activity	molecular_function	0.64445	1	1	702	20	20361	100135687
GO:0016810	hydrolase activity, acting on carbon-nitrogen (but not peptide) bonds	molecular_function	0.64513	1	3	702	91	20361	1.01107e+26
GO:0003924	GTPase activity	molecular_function	0.64602	1	13	702	406	20361	1.0112e+116
GO:0006298	mismatch repair	biological_process	0.64617	1	1	702	23	20361	101119199
GO:0005996	monosaccharide metabolic process	biological_process	0.6469	1	4	702	123	20361	4.4344e+32
GO:0071704	organic substance metabolic process	biological_process	0.64734	1	269	702	7932	20361	101104156,101107495,101117580,443068,101117084,101116950,101110686,101120976,101102402,101113261,101114511,101113687,101118097,101111299,101113262,100642179,101122913,101122606,101107789,105616317,101102074,101105428,101119298,101113586,101109328,101104199,101111953,101102311,101114682,101104881,101115611,101115623,101103590,101109781,100135699,101117488,101115361,100820740,101102739,101114027,10…
GO:0009236	cobalamin biosynthetic process	biological_process	0.64768	1	1	702	25	20361	101105203
GO:0000271	polysaccharide biosynthetic process	biological_process	0.64827	1	1	702	28	20361	101116835
GO:0045087	innate immune response	biological_process	0.65015	1	1	702	33	20361	101107646
GO:0043603	cellular amide metabolic process	biological_process	0.65031	1	2	702	58	20361	1.01115e+17
GO:0006082	organic acid metabolic process	biological_process	0.65222	1	17	702	470	20361	1.01119e+152
GO:0001503	ossification	biological_process	0.65233	1	1	702	32	20361	101120495
GO:0007029	endoplasmic reticulum organization	biological_process	0.65251	1	1	702	26	20361	101114034
GO:0048646	anatomical structure formation involved in morphogenesis	biological_process	0.65262	1	3	702	92	20361	1.05604e+26
GO:0035091	phosphatidylinositol binding	molecular_function	0.65266	1	3	702	74	20361	1.01108e+26
GO:0007091	metaphase/anaphase transition of mitotic cell cycle	biological_process	0.65457	1	1	702	34	20361	101108973
GO:0030071	regulation of mitotic metaphase/anaphase transition	biological_process	0.65457	1	1	702	34	20361	101108973
GO:0044784	metaphase/anaphase transition of cell cycle	biological_process	0.65457	1	1	702	34	20361	101108973
GO:1902099	regulation of metaphase/anaphase transition of cell cycle	biological_process	0.65457	1	1	702	34	20361	101108973
GO:0043229	intracellular organelle	cellular_component	0.65516	1	135	702	4225	20361	101105618,101112636,101115273,101101895,101104040,101123062,101104535,101115695,101108379,101114431,101115263,101101949,101117106,101106340,101114909,101118475,101114392,101108960,101120756,101120495,101115877,101122835,101105027,101114878,101123504,101110314,101110051,101112408,443412,101115490,101121782,100217409,100653388,105605902,101105233,101110276,101102395,101110060,105606632,101112880,10…
GO:0009235	cobalamin metabolic process	biological_process	0.65544	1	1	702	26	20361	101105203
GO:0008378	galactosyltransferase activity	molecular_function	0.65687	1	1	702	31	20361	101104544
GO:0043226	organelle	cellular_component	0.65755	1	135	702	4226	20361	443189,101117261,101109663,101109713,101108716,101109149,100169935,101110526,100233164,101103126,101107196,101106329,101112864,101110972,101123644,101105203,101121019,101120630,101111130,101118975,101114883,101109113,101107891,100135699,101115785,101117488,101101994,101108973,101113240,101102623,101109328,101104199,101115356,101108320,101115611,101113586,101102901,101116309,101111845,101119906,10…
GO:0006760	folic acid-containing compound metabolic process	biological_process	0.65768	1	1	702	23	20361	100137069
GO:0008053	mitochondrial fusion	biological_process	0.659	1	1	702	27	20361	101110526
GO:0030312	external encapsulating structure	cellular_component	0.65903	1	4	702	126	20361	1.0112e+35
GO:0044264	cellular polysaccharide metabolic process	biological_process	0.65958	1	1	702	33	20361	101116835
GO:0040011	locomotion	biological_process	0.65982	1	9	702	256	20361	1.01109e+80
GO:0050660	flavin adenine dinucleotide binding	molecular_function	0.66119	1	3	702	81	20361	1.01118e+26
GO:0008654	phospholipid biosynthetic process	biological_process	0.66205	1	3	702	95	20361	1.01103e+26
GO:0033179	proton-transporting V-type ATPase, V0 domain	cellular_component	0.6623	1	2	702	56	20361	1.01114e+17
GO:0008061	chitin binding	molecular_function	0.6624	1	1	702	30	20361	101108067
GO:0040007	growth	biological_process	0.6631	1	2	702	77	20361	1.01109e+17
GO:0016651	oxidoreductase activity, acting on NAD(P)H	molecular_function	0.6631	1	6	702	174	20361	1.01108e+53
GO:0007268	synaptic transmission	biological_process	0.66544	1	1	702	25	20361	101120756
GO:0019226	transmission of nerve impulse	biological_process	0.66544	1	1	702	25	20361	101120756
GO:0035637	multicellular organismal signaling	biological_process	0.66544	1	1	702	25	20361	101120756
GO:0005856	cytoskeleton	cellular_component	0.66687	1	17	702	517	20361	1.01105e+152
GO:0006030	chitin metabolic process	biological_process	0.66746	1	1	702	27	20361	101108067
GO:1901071	glucosamine-containing compound metabolic process	biological_process	0.66746	1	1	702	27	20361	101108067
GO:0016477	cell migration	biological_process	0.66819	1	1	702	27	20361	101108973
GO:0030334	regulation of cell migration	biological_process	0.66819	1	1	702	27	20361	101108973
GO:0004866	endopeptidase inhibitor activity	molecular_function	0.6695	1	4	702	127	20361	1.01112e+35
GO:0061135	endopeptidase regulator activity	molecular_function	0.6695	1	4	702	127	20361	1.01112e+35
GO:0008643	carbohydrate transport	biological_process	0.66992	1	2	702	60	20361	1.01109e+17
GO:0061024	membrane organization	biological_process	0.67078	1	5	702	150	20361	1.01111e+44
GO:0051213	dioxygenase activity	molecular_function	0.67102	1	3	702	87	20361	1.01115e+26
GO:0006367	transcription initiation from RNA polymerase II promoter	biological_process	0.67122	1	2	702	61	20361	443068101122655
GO:0051082	unfolded protein binding	molecular_function	0.67161	1	4	702	136	20361	1.01108e+35
GO:0017119	Golgi transport complex	cellular_component	0.67182	1	1	702	32	20361	101110805
GO:0033365	protein localization to organelle	biological_process	0.67386	1	8	702	253	20361	1.01115e+71
GO:0044424	intracellular part	cellular_component	0.67586	1	165	702	5082	20361	101114431,101101949,101115263,101115695,101108379,101114392,101118475,101121279,101108960,101117106,101114909,101106340,101112636,101118578,101104040,101101895,101115273,101105618,101123062,101104535,101123504,101110314,101111828,101110051,105605902,101110276,101105233,101106069,443412,101112408,100653388,100217409,101115490,101121782,101113270,101103679,101115877,101120495,101111833,101120756,10…
GO:0044772	mitotic cell cycle phase transition	biological_process	0.67609	1	1	702	38	20361	101108973
GO:1901990	regulation of mitotic cell cycle phase transition	biological_process	0.67609	1	1	702	38	20361	101108973
GO:0004197	cysteine-type endopeptidase activity	molecular_function	0.67613	1	5	702	142	20361	1.01109e+44
GO:0005543	phospholipid binding	molecular_function	0.67613	1	5	702	124	20361	1.01108e+44
GO:0009064	glutamine family amino acid metabolic process	biological_process	0.67628	1	1	702	29	20361	101103276
GO:0048518	positive regulation of biological process	biological_process	0.67685	1	11	702	337	20361	1.01113e+98
GO:0005244	voltage-gated ion channel activity	molecular_function	0.67713	1	4	702	120	20361	1.01112e+35
GO:0022832	voltage-gated channel activity	molecular_function	0.67713	1	4	702	120	20361	1.01112e+35
GO:0006260	DNA replication	biological_process	0.67958	1	15	702	447	20361	1.01112e+134
GO:0044085	cellular component biogenesis	biological_process	0.67975	1	29	702	917	20361	101116804,101112460,101117084,101120843,101115356,101113427,101102395,101102623,101115253,101120495,443274,101123485,101122281,101108732,101103123,101119564,101117047,101108973,101115490,101116170,101102663,101109149,105616317,101105428,101110938,101121788,101108178,101102681,101118097
GO:0000778	condensed nuclear chromosome kinetochore	cellular_component	0.68023	1	2	702	70	20361	1.01116e+17
GO:0000780	condensed nuclear chromosome, centromeric region	cellular_component	0.68023	1	2	702	70	20361	1.01116e+17
GO:0000942	condensed nuclear chromosome outer kinetochore	cellular_component	0.68023	1	2	702	70	20361	1.01116e+17
GO:0042729	DASH complex	cellular_component	0.68023	1	2	702	70	20361	1.01116e+17
GO:0070206	protein trimerization	biological_process	0.68064	1	1	702	32	20361	101115490
GO:0016050	vesicle organization	biological_process	0.68145	1	1	702	29	20361	101117047
GO:0043085	positive regulation of catalytic activity	biological_process	0.68233	1	1	702	26	20361	443274
GO:0044093	positive regulation of molecular function	biological_process	0.68233	1	1	702	26	20361	443274
GO:0022603	regulation of anatomical structure morphogenesis	biological_process	0.6825	1	1	702	28	20361	101119564
GO:0019069	viral capsid assembly	biological_process	0.68287	1	1	702	34	20361	101102623
GO:0005774	vacuolar membrane	cellular_component	0.68525	1	1	702	25	20361	101111207
GO:0044437	vacuolar part	cellular_component	0.68525	1	1	702	25	20361	101111207
GO:1901137	carbohydrate derivative biosynthetic process	biological_process	0.68534	1	13	702	390	20361	1.01103e+116
GO:0004181	metallocarboxypeptidase activity	molecular_function	0.68587	1	1	702	22	20361	101102739
GO:0016469	proton-transporting two-sector ATPase complex	cellular_component	0.68612	1	6	702	192	20361	1.01105e+53
GO:0044281	small molecule metabolic process	biological_process	0.68613	1	31	702	890	20361	101117758,101107321,101107789,101105233,101103276,101104544,101118975,101121788,101104486,101117299,101111828,101107295,443440,101102003,101113687,101104156,101105203,101114822,101113635,101111953,101122401,100169936,101122150,101105618,101119512,105611834,101103126,101119442,443274,100137069,101107196
GO:0009790	embryo development	biological_process	0.68695	1	1	702	25	20361	101108973
GO:0007267	cell-cell signaling	biological_process	0.68701	1	1	702	29	20361	101120756
GO:0006606	protein import into nucleus	biological_process	0.68712	1	4	702	139	20361	1.00125e+35
GO:0034504	protein localization to nucleus	biological_process	0.68712	1	4	702	139	20361	1.01115e+35
GO:0044744	protein targeting to nucleus	biological_process	0.68712	1	4	702	139	20361	1.0111e+35
GO:0051170	nuclear import	biological_process	0.68712	1	4	702	139	20361	1.01115e+35
GO:0044265	cellular macromolecule catabolic process	biological_process	0.68716	1	5	702	161	20361	1.01103e+44
GO:0008064	regulation of actin polymerization or depolymerization	biological_process	0.68837	1	1	702	37	20361	101119564
GO:0008154	actin polymerization or depolymerization	biological_process	0.68837	1	1	702	37	20361	101119564
GO:0030041	actin filament polymerization	biological_process	0.68837	1	1	702	37	20361	101119564
GO:0030832	regulation of actin filament length	biological_process	0.68837	1	1	702	37	20361	101119564
GO:0030833	regulation of actin filament polymerization	biological_process	0.68837	1	1	702	37	20361	101119564
GO:0032271	regulation of protein polymerization	biological_process	0.68837	1	1	702	37	20361	101119564
GO:0032535	regulation of cellular component size	biological_process	0.68837	1	1	702	37	20361	101119564
GO:0032956	regulation of actin cytoskeleton organization	biological_process	0.68837	1	1	702	37	20361	101119564
GO:0032970	regulation of actin filament-based process	biological_process	0.68837	1	1	702	37	20361	101119564
GO:0043254	regulation of protein complex assembly	biological_process	0.68837	1	1	702	37	20361	101119564
GO:0048522	positive regulation of cellular process	biological_process	0.68926	1	10	702	306	20361	1.0112e+89
GO:0080134	regulation of response to stress	biological_process	0.68984	1	1	702	30	20361	101107646
GO:0022412	cellular process involved in reproduction in multicellular organism	biological_process	0.69213	1	2	702	69	20361	1.05604e+17
GO:0016849	phosphorus-oxygen lyase activity	molecular_function	0.69529	1	2	702	52	20361	1.01113e+17
GO:0017004	cytochrome complex assembly	biological_process	0.69542	1	1	702	28	20361	101113427
GO:0072528	pyrimidine-containing compound biosynthetic process	biological_process	0.69597	1	2	702	61	20361	101103276443440
GO:0000921	septin ring assembly	biological_process	0.6977	1	1	702	28	20361	101108973
GO:0005940	septin ring	cellular_component	0.6977	1	1	702	28	20361	101108973
GO:0031106	septin ring organization	biological_process	0.6977	1	1	702	28	20361	101108973
GO:0032156	septin cytoskeleton	cellular_component	0.6977	1	1	702	28	20361	101108973
GO:0032185	septin cytoskeleton organization	biological_process	0.6977	1	1	702	28	20361	101108973
GO:0006289	nucleotide-excision repair	biological_process	0.69877	1	1	702	29	20361	101102610
GO:0009061	anaerobic respiration	biological_process	0.69885	1	1	702	29	20361	100135687
GO:0015948	methanogenesis	biological_process	0.69885	1	1	702	29	20361	100135687
GO:0015975	energy derivation by oxidation of reduced inorganic compounds	biological_process	0.69885	1	1	702	29	20361	100135687
GO:0043447	alkane biosynthetic process	biological_process	0.69885	1	1	702	29	20361	100135687
GO:0019882	antigen processing and presentation	biological_process	0.69923	1	1	702	52	20361	101105341
GO:0010038	response to metal ion	biological_process	0.70073	1	1	702	27	20361	101108667
GO:0046488	phosphatidylinositol metabolic process	biological_process	0.70106	1	3	702	94	20361	1.01108e+23
GO:0005623	cell	cellular_component	0.70267	1	189	702	5839	20361	101107863,100125358,101112662,101106620,101104867,101104486,101111390,101107392,101102133,101121829,101106703,101110391,101108844,105602103,101105756,101104074,101109732,101111545,101122279,101114643,101122961,101122806,101106986,101108762,101123350,101106631,101117032,101113668,101115229,101114927,101111278,101108200,101108067,101113497,101112880,101105452,101120843,101120429,101113427,101101892…
GO:0044464	cell part	cellular_component	0.70267	1	189	702	5839	20361	101106069,443412,101112408,100217409,100653388,101121782,101115490,105605902,101110276,101105233,101110314,101123504,101111828,101110051,780473,101107646,101122835,101105027,101114878,101122401,101111833,101120756,101106127,101104244,101103679,101115877,101113270,101120495,101117106,101114909,101106340,101114392,101118475,101108960,101121279,101104136,101115695,101108379,101114431,101115263,10110…
GO:0003684	damaged DNA binding	molecular_function	0.70293	1	1	702	27	20361	101102610
GO:0050909	sensory perception of taste	biological_process	0.70355	1	1	702	62	20361	101119227
GO:0042802	identical protein binding	molecular_function	0.70362	1	5	702	166	20361	1.01109e+44
GO:0019318	hexose metabolic process	biological_process	0.70431	1	3	702	103	20361	1.01117e+23
GO:0010628	positive regulation of gene expression	biological_process	0.70556	1	2	702	62	20361	1.01116e+17
GO:0045893	positive regulation of transcription, DNA-dependent	biological_process	0.70556	1	2	702	62	20361	1.01106e+17
GO:0006220	pyrimidine nucleotide metabolic process	biological_process	0.70592	1	1	702	39	20361	101103276
GO:0000279	M phase	biological_process	0.70661	1	1	702	38	20361	101114878
GO:0022403	cell cycle phase	biological_process	0.70661	1	1	702	38	20361	101114878
GO:0005267	potassium channel activity	molecular_function	0.70707	1	4	702	118	20361	1.01112e+35
GO:0015947	methane metabolic process	biological_process	0.70849	1	1	702	30	20361	100135687
GO:0043446	cellular alkane metabolic process	biological_process	0.70849	1	1	702	30	20361	100135687
GO:0003857	3-hydroxyacyl-CoA dehydrogenase activity	molecular_function	0.70852	1	1	702	27	20361	101118975
GO:0050793	regulation of developmental process	biological_process	0.70853	1	2	702	58	20361	1.0112e+17
GO:0008023	transcription elongation factor complex	cellular_component	0.70903	1	1	702	28	20361	101123350
GO:0009056	catabolic process	biological_process	0.70905	1	24	702	703	20361	1.01102e+209
GO:0005044	scavenger receptor activity	molecular_function	0.71012	1	2	702	64	20361	1.0111e+17
GO:0038024	cargo receptor activity	molecular_function	0.71012	1	2	702	64	20361	1.0111e+17
GO:0030154	cell differentiation	biological_process	0.71024	1	6	702	199	20361	1.01105e+53
GO:0043934	sporulation	biological_process	0.71027	1	1	702	29	20361	101121829
GO:0019899	enzyme binding	molecular_function	0.71075	1	4	702	115	20361	1.01122e+35
GO:0008235	metalloexopeptidase activity	molecular_function	0.71713	1	1	702	25	20361	101102739
GO:0006576	cellular biogenic amine metabolic process	biological_process	0.71829	1	2	702	74	20361	1.01102e+17
GO:0044106	cellular amine metabolic process	biological_process	0.71829	1	2	702	74	20361	1.01102e+17
GO:0052652	cyclic purine nucleotide metabolic process	biological_process	0.71843	1	1	702	25	20361	101122401
GO:0016829	lyase activity	molecular_function	0.71905	1	12	702	350	20361	1.01113e+104
GO:0010876	lipid localization	biological_process	0.71949	1	3	702	119	20361	1.01115e+26
GO:0042558	pteridine-containing compound metabolic process	biological_process	0.72061	1	1	702	28	20361	100137069
GO:0043436	oxoacid metabolic process	biological_process	0.72067	1	16	702	463	20361	1.01115e+143
GO:0034637	cellular carbohydrate biosynthetic process	biological_process	0.72148	1	1	702	32	20361	101116835
GO:0006357	regulation of transcription from RNA polymerase II promoter	biological_process	0.72269	1	5	702	169	20361	1.01116e+44
GO:0005622	intracellular	cellular_component	0.72348	1	175	702	5450	20361	101111386,101123062,101104535,101112636,101118578,101101895,101104040,101115273,101105618,101118475,101114392,101121279,101108960,101104136,101117106,101114909,101106340,101114431,101115263,101101949,101115695,101108379,101105027,101114878,101107646,101122835,101103679,101115877,101113270,101120495,101120756,101111833,105605902,101110276,101105233,443412,101106069,101112408,100653388,100217409,10…
GO:0008121	ubiquinol-cytochrome-c reductase activity	molecular_function	0.72498	1	1	702	31	20361	101118505
GO:0016681	oxidoreductase activity, acting on diphenols and related substances as donors, cytochrome as acceptor	molecular_function	0.72498	1	1	702	31	20361	101118505
GO:0033178	proton-transporting two-sector ATPase complex, catalytic domain	cellular_component	0.7251	1	2	702	66	20361	1.01119e+17
GO:0050661	NADP binding	molecular_function	0.7262	1	1	702	30	20361	101118975
GO:0019829	cation-transporting ATPase activity	molecular_function	0.72654	1	1	702	36	20361	101104156
GO:0042625	ATPase activity, coupled to transmembrane movement of ions	molecular_function	0.72654	1	1	702	36	20361	101104156
GO:0006119	oxidative phosphorylation	biological_process	0.728	1	1	702	38	20361	101114883
GO:0042773	ATP synthesis coupled electron transport	biological_process	0.728	1	1	702	38	20361	101114883
GO:0009057	macromolecule catabolic process	biological_process	0.73103	1	7	702	229	20361	1.01117e+62
GO:0000145	exocyst	cellular_component	0.73154	1	1	702	30	20361	101107646
GO:0008175	tRNA methyltransferase activity	molecular_function	0.73258	1	1	702	37	20361	101122281
GO:0051087	chaperone binding	molecular_function	0.73308	1	1	702	40	20361	101104118
GO:0001076	RNA polymerase II transcription factor binding transcription factor activity	molecular_function	0.73331	1	4	702	135	20361	1.05602e+35
GO:0001104	RNA polymerase II transcription cofactor activity	molecular_function	0.73331	1	4	702	135	20361	1.01112e+35
GO:0016655	oxidoreductase activity, acting on NAD(P)H, quinone or similar compound as acceptor	molecular_function	0.73444	1	2	702	68	20361	1.01115e+17
GO:0051607	defense response to virus	biological_process	0.73447	1	1	702	35	20361	101108973
GO:0043228	non-membrane-bounded organelle	cellular_component	0.73606	1	43	702	1654	20361	101104902,101110686,101120495,101106341,101122279,101120756,101110805,101108844,101104199,101114878,101115611,101106703,101122835,101107392,101117901,101111130,101104867,101119170,101109113,101123504,101105233,101110276,101112662,101107863,101108973,101112636,101105618,105606632,101114241,101102395,101110060,101123062,101120843,101121019,101116309,101114431,101108379,101105428,101109663,101109149…
GO:0043232	intracellular non-membrane-bounded organelle	cellular_component	0.73606	1	43	702	1654	20361	101116309,101114431,101105428,101109663,101108379,101118475,101109149,101108960,101122806,101112636,101102395,101110060,101114241,101105618,105606632,101123062,101120843,101121019,101111130,101117901,101109113,101123504,101119170,101104867,101105233,101110276,101112662,101107863,101108973,101120495,101106341,101104902,101110686,101120756,101122279,101115611,101106703,101110805,101108844,101104199…
GO:0008375	acetylglucosaminyltransferase activity	molecular_function	0.73676	1	1	702	34	20361	101107989
GO:0000276	mitochondrial proton-transporting ATP synthase complex, coupling factor F(o)	cellular_component	0.73773	1	1	702	47	20361	101105618
GO:0016755	transferase activity, transferring amino-acyl groups	molecular_function	0.73804	1	1	702	33	20361	101102265
GO:0019867	outer membrane	cellular_component	0.73959	1	6	702	201	20361	1.0112e+53
GO:0016835	carbon-oxygen lyase activity	molecular_function	0.74314	1	3	702	103	20361	1.01119e+26
GO:0008146	sulfotransferase activity	molecular_function	0.74401	1	2	702	66	20361	1.01118e+17
GO:0016592	mediator complex	cellular_component	0.74488	1	4	702	137	20361	1.01111e+35
GO:0006040	amino sugar metabolic process	biological_process	0.74525	1	1	702	34	20361	101108067
GO:0007276	gamete generation	biological_process	0.74562	1	3	702	110	20361	1.01104e+26
GO:0016886	ligase activity, forming phosphoric ester bonds	molecular_function	0.74609	1	1	702	34	20361	101116625
GO:0007283	spermatogenesis	biological_process	0.74619	1	1	702	37	20361	101111207
GO:0048232	male gamete generation	biological_process	0.74619	1	1	702	37	20361	101111207
GO:0005581	collagen	cellular_component	0.74731	1	1	702	24	20361	101114569
GO:0006836	neurotransmitter transport	biological_process	0.75015	1	1	702	32	20361	101108183
GO:0042597	periplasmic space	cellular_component	0.75078	1	1	702	33	20361	101106889
GO:0006352	DNA-dependent transcription, initiation	biological_process	0.75246	1	4	702	167	20361	1.0111e+32
GO:0044270	cellular nitrogen compound catabolic process	biological_process	0.75411	1	4	702	123	20361	1.01117e+32
GO:0046700	heterocycle catabolic process	biological_process	0.75411	1	4	702	123	20361	1.01117e+32
GO:0044248	cellular catabolic process	biological_process	0.75537	1	19	702	573	20361	1.01116e+167
GO:0003713	transcription coactivator activity	molecular_function	0.75548	1	1	702	30	20361	101103795
GO:0002252	immune effector process	biological_process	0.75621	1	1	702	38	20361	101108973
GO:0032984	macromolecular complex disassembly	biological_process	0.75626	1	1	702	46	20361	443068
GO:0016278	lysine N-methyltransferase activity	molecular_function	0.75751	1	1	702	35	20361	101114918
GO:0016279	protein-lysine N-methyltransferase activity	molecular_function	0.75751	1	1	702	35	20361	101114918
GO:0018024	histone-lysine N-methyltransferase activity	molecular_function	0.75751	1	1	702	35	20361	101114918
GO:0042054	histone methyltransferase activity	molecular_function	0.75751	1	1	702	35	20361	101114918
GO:0006479	protein methylation	biological_process	0.75752	1	1	702	37	20361	100037702
GO:0008213	protein alkylation	biological_process	0.75752	1	1	702	37	20361	100037702
GO:0016646	oxidoreductase activity, acting on the CH-NH group of donors, NAD or NADP as acceptor	molecular_function	0.75774	1	1	702	33	20361	100137069
GO:0007017	microtubule-based process	biological_process	0.75849	1	8	702	231	20361	1.01116e+71
GO:0004713	protein tyrosine kinase activity	molecular_function	0.76031	1	1	702	29	20361	101103590
GO:0048284	organelle fusion	biological_process	0.76089	1	1	702	33	20361	101110526
GO:0005249	voltage-gated potassium channel activity	molecular_function	0.76129	1	2	702	74	20361	1.0112e+17
GO:0022607	cellular component assembly	biological_process	0.76216	1	24	702	791	20361	1.01122e+215
GO:0010604	positive regulation of macromolecule metabolic process	biological_process	0.76225	1	3	702	105	20361	1.01116e+26
GO:0061025	membrane fusion	biological_process	0.76454	1	2	702	73	20361	1.01119e+17
GO:0045786	negative regulation of cell cycle	biological_process	0.76548	1	1	702	44	20361	101108973
GO:0003690	double-stranded DNA binding	molecular_function	0.76558	1	1	702	43	20361	101119199
GO:0005184	neuropeptide hormone activity	molecular_function	0.76565	1	1	702	37	20361	101102220
GO:0022411	cellular component disassembly	biological_process	0.76618	1	1	702	48	20361	443068
GO:0044087	regulation of cellular component biogenesis	biological_process	0.76725	1	1	702	46	20361	101119564
GO:0044267	cellular protein metabolic process	biological_process	0.76796	1	80	702	2633	20361	101111390,101116625,101104118,101117901,101107989,101104486,101104227,101113261,101102402,101102265,101107425,101105030,101114291,101107438,101104902,101110686,101104074,101119512,101105074,101121483,101102513,101110391,101119067,101108264,101108067,101105428,101123350,105616317,100913159,101122806,100037702,101107789,101122606,101120982,101107106,101119564,101116201,101110060,105606632,101102973…
GO:0072527	pyrimidine-containing compound metabolic process	biological_process	0.76904	1	2	702	75	20361	101103276443440
GO:0006633	fatty acid biosynthetic process	biological_process	0.76952	1	1	702	42	20361	105611834
GO:0055114	oxidation-reduction process	biological_process	0.77108	1	43	702	1273	20361	101102901,101117784,101122806,101107321,101117758,101108716,101121880,101104943,105611834,101104767,443530,100137069,101107837,101111779,101113611,101115197,101113427,101110351,101114883,101118975,101118097,105613870,100135687,101120517,101118837,101104150,101112815,101107891,100568289,101118505,101101902,101102402,101107438,443053,101117580,101106703,768095,101108320,101111953,101116418,10111047…
GO:0007015	actin filament organization	biological_process	0.77188	1	1	702	53	20361	101119564
GO:0006265	DNA topological change	biological_process	0.77209	1	1	702	41	20361	101108762
GO:0019901	protein kinase binding	molecular_function	0.77455	1	1	702	40	20361	101102973
GO:0043623	cellular protein complex assembly	biological_process	0.7747	1	9	702	305	20361	1.01109e+80
GO:0030286	dynein complex	cellular_component	0.77489	1	1	702	24	20361	101108960
GO:0000160	phosphorelay signal transduction system	biological_process	0.77549	1	1	702	35	20361	101123371
GO:1901575	organic substance catabolic process	biological_process	0.77581	1	14	702	440	20361	1.01123e+119
GO:0032507	maintenance of protein location in cell	biological_process	0.77645	1	2	702	70	20361	1.01114e+17
GO:0045185	maintenance of protein location	biological_process	0.77645	1	2	702	70	20361	1.01122e+17
GO:0051235	maintenance of location	biological_process	0.77645	1	2	702	70	20361	1.01114e+17
GO:0051651	maintenance of location in cell	biological_process	0.77645	1	2	702	70	20361	1.01114e+17
GO:0048468	cell development	biological_process	0.77682	1	3	702	104	20361	1.0112e+26
GO:0008152	metabolic process	biological_process	0.77787	1	312	702	9284	20361	101122496,101122150,101115777,101121019,101108411,101115891,101107166,443530,101118500,101108716,101113126,101117758,100233164,443189,101102681,101109663,101111953,101102311,101109328,101104199,101115611,768095,101104881,101114682,101113586,101103590,101115623,101109781,101114027,101102739,101107891,101115361,101117488,100135699,100820740,100135687,101120630,101108755,101114883,101109113,10111326…
GO:0006904	vesicle docking involved in exocytosis	biological_process	0.77816	1	1	702	31	20361	101107646
GO:0015079	potassium ion transmembrane transporter activity	molecular_function	0.77995	1	4	702	132	20361	1.01112e+35
GO:0070647	protein modification by small protein conjugation or removal	biological_process	0.78025	1	4	702	132	20361	1.0112e+35
GO:0006575	cellular modified amino acid metabolic process	biological_process	0.78091	1	2	702	68	20361	1.00137e+17
GO:0008171	O-methyltransferase activity	molecular_function	0.78336	1	1	702	46	20361	100037702
GO:0034622	cellular macromolecular complex assembly	biological_process	0.78384	1	11	702	385	20361	1.01109e+98
GO:0006413	translational initiation	biological_process	0.78389	1	1	702	48	20361	101112759
GO:0044420	extracellular matrix part	cellular_component	0.78475	1	1	702	29	20361	101114569
GO:0006401	RNA catabolic process	biological_process	0.78677	1	1	702	35	20361	101104304
GO:0051051	negative regulation of transport	biological_process	0.78683	1	1	702	29	20361	101121946
GO:0030117	membrane coat	cellular_component	0.7877	1	5	702	149	20361	1.01104e+44
GO:0048475	coated membrane	cellular_component	0.7877	1	5	702	149	20361	1.01104e+44
GO:0072330	monocarboxylic acid biosynthetic process	biological_process	0.78829	1	1	702	44	20361	105611834
GO:0043414	macromolecule methylation	biological_process	0.78832	1	2	702	78	20361	100037702443274
GO:0000502	proteasome complex	cellular_component	0.78848	1	1	702	54	20361	101106341
GO:1901361	organic cyclic compound catabolic process	biological_process	0.78895	1	4	702	129	20361	1.01117e+32
GO:0000794	condensed nuclear chromosome	cellular_component	0.79032	1	2	702	85	20361	1.01114e+17
GO:0005525	GTP binding	molecular_function	0.79059	1	16	702	554	20361	1.0111e+143
GO:0042600	chorion	cellular_component	0.79309	1	2	702	86	20361	1.01104e+17
GO:0004175	endopeptidase activity	molecular_function	0.79471	1	23	702	775	20361	1.01102e+200
GO:0030054	cell junction	cellular_component	0.79522	1	1	702	38	20361	101105473
GO:0008234	cysteine-type peptidase activity	molecular_function	0.79528	1	6	702	194	20361	1.01104e+53
GO:0009451	RNA modification	biological_process	0.79588	1	3	702	128	20361	4.43274e+23
GO:0015630	microtubule cytoskeleton	cellular_component	0.79597	1	6	702	204	20361	1.01109e+53
GO:0022406	membrane docking	biological_process	0.79644	1	1	702	33	20361	101107646
GO:0048278	vesicle docking	biological_process	0.79644	1	1	702	33	20361	101107646
GO:0032561	guanyl ribonucleotide binding	molecular_function	0.79844	1	16	702	558	20361	1.0112e+143
GO:0004620	phospholipase activity	molecular_function	0.79888	1	1	702	35	20361	101117580
GO:0008608	attachment of spindle microtubules to kinetochore	biological_process	0.79972	1	1	702	40	20361	101114241
GO:0015370	solute:sodium symporter activity	molecular_function	0.8006	1	1	702	37	20361	101108183
GO:0006281	DNA repair	biological_process	0.80133	1	14	702	496	20361	1.01103e+125
GO:0008757	S-adenosylmethionine-dependent methyltransferase activity	molecular_function	0.80198	1	3	702	119	20361	1.01122e+26
GO:0010639	negative regulation of organelle organization	biological_process	0.80273	1	1	702	47	20361	101108973
GO:0005783	endoplasmic reticulum	cellular_component	0.80295	1	8	702	296	20361	1.01123e+71
GO:0019439	aromatic compound catabolic process	biological_process	0.80476	1	4	702	132	20361	1.01102e+32
GO:0003678	DNA helicase activity	molecular_function	0.80569	1	3	702	118	20361	1.01113e+26
GO:0019842	vitamin binding	molecular_function	0.80597	1	1	702	42	20361	101120867
GO:0019001	guanyl nucleotide binding	molecular_function	0.80605	1	16	702	560	20361	1.01107e+143
GO:1901135	carbohydrate derivative metabolic process	biological_process	0.80757	1	17	702	548	20361	1.01103e+149
GO:0008610	lipid biosynthetic process	biological_process	0.80819	1	6	702	223	20361	1.01122e+53
GO:0051336	regulation of hydrolase activity	biological_process	0.80984	1	2	702	73	20361	443274101117299
GO:0003916	DNA topoisomerase activity	molecular_function	0.81011	1	1	702	46	20361	101108762
GO:0005201	extracellular matrix structural constituent	molecular_function	0.81072	1	1	702	32	20361	101114569
GO:0001510	RNA methylation	biological_process	0.81273	1	1	702	43	20361	443274
GO:0009306	protein secretion	biological_process	0.81471	1	1	702	49	20361	101122835
GO:0016569	covalent chromatin modification	biological_process	0.81499	1	1	702	41	20361	101123350
GO:0016570	histone modification	biological_process	0.81499	1	1	702	41	20361	101123350
GO:0006974	response to DNA damage stimulus	biological_process	0.81624	1	15	702	544	20361	1.01106e+134
GO:0034453	microtubule anchoring	biological_process	0.81753	1	1	702	43	20361	101114241
GO:0006944	cellular membrane fusion	biological_process	0.82168	1	1	702	43	20361	101110526
GO:0072594	establishment of protein localization to organelle	biological_process	0.82251	1	2	702	83	20361	1.01109e+17
GO:0006520	cellular amino acid metabolic process	biological_process	0.82469	1	10	702	335	20361	1.01115e+89
GO:0031090	organelle membrane	cellular_component	0.82625	1	18	702	615	20361	1.01111e+161
GO:0005789	endoplasmic reticulum membrane	cellular_component	0.82696	1	5	702	203	20361	1.01114e+44
GO:0009190	cyclic nucleotide biosynthetic process	biological_process	0.82757	1	1	702	35	20361	101122401
GO:0045935	positive regulation of nucleobase-containing compound metabolic process	biological_process	0.82792	1	2	702	85	20361	1.01106e+17
GO:0051173	positive regulation of nitrogen compound metabolic process	biological_process	0.82792	1	2	702	85	20361	1.01116e+17
GO:0051254	positive regulation of RNA metabolic process	biological_process	0.82792	1	2	702	85	20361	1.01116e+17
GO:0000904	cell morphogenesis involved in differentiation	biological_process	0.82985	1	1	702	39	20361	101119564
GO:0005976	polysaccharide metabolic process	biological_process	0.8318	1	1	702	54	20361	101116835
GO:0006790	sulfur compound metabolic process	biological_process	0.83186	1	2	702	76	20361	1.01115e+17
GO:0006368	transcription elongation from RNA polymerase II promoter	biological_process	0.83189	1	1	702	47	20361	101123350
GO:0008194	UDP-glycosyltransferase activity	molecular_function	0.83286	1	2	702	83	20361	1.01115e+17
GO:0003743	translation initiation factor activity	molecular_function	0.83449	1	1	702	59	20361	101112759
GO:0000152	nuclear ubiquitin ligase complex	cellular_component	0.83597	1	3	702	116	20361	1.01117e+26
GO:0005680	anaphase-promoting complex	cellular_component	0.83597	1	3	702	116	20361	1.01109e+26
GO:0031461	cullin-RING ubiquitin ligase complex	cellular_component	0.83597	1	3	702	116	20361	1.01109e+26
GO:0009891	positive regulation of biosynthetic process	biological_process	0.83805	1	2	702	89	20361	1.01116e+17
GO:0010557	positive regulation of macromolecule biosynthetic process	biological_process	0.83805	1	2	702	89	20361	1.01106e+17
GO:0031328	positive regulation of cellular biosynthetic process	biological_process	0.83805	1	2	702	89	20361	1.01116e+17
GO:2000026	regulation of multicellular organismal development	biological_process	0.83861	1	1	702	41	20361	101108973
GO:0006302	double-strand break repair	biological_process	0.83901	1	1	702	43	20361	101109980
GO:0044432	endoplasmic reticulum part	cellular_component	0.83925	1	5	702	208	20361	1.01115e+44
GO:0006259	DNA metabolic process	biological_process	0.84126	1	37	702	1226	20361	101120495,101106341,101106170,101108271,101123503,101105473,101119199,101109980,101109113,101107758,101104486,101107891,101115490,101122606,101107166,101112636,101122281,100642179,101116716,101106329,101111386,101120429,101105452,101113262,101105645,101102681,101115254,101109405,101105428,101109663,101119906,101114112,101102610,101112580,100233164,101111501,101108762
GO:0016741	transferase activity, transferring one-carbon groups	molecular_function	0.84173	1	9	702	323	20361	1.01114e+77
GO:0007606	sensory perception of chemical stimulus	biological_process	0.8427	1	1	702	84	20361	101119227
GO:0009523	photosystem II	cellular_component	0.84283	1	2	702	88	20361	1.01122e+17
GO:0016881	acid-amino acid ligase activity	molecular_function	0.84441	1	7	702	218	20361	1.01105e+62
GO:0044283	small molecule biosynthetic process	biological_process	0.84514	1	7	702	256	20361	1.01105e+62
GO:0009308	amine metabolic process	biological_process	0.84534	1	2	702	100	20361	1.01113e+17
GO:0044057	regulation of system process	biological_process	0.84595	1	1	702	45	20361	101120756
GO:0005741	mitochondrial outer membrane	cellular_component	0.84657	1	2	702	93	20361	1.01111e+17
GO:0031968	organelle outer membrane	cellular_component	0.84657	1	2	702	93	20361	1.00125e+17
GO:0016765	transferase activity, transferring alkyl or aryl (other than methyl) groups	molecular_function	0.84674	1	1	702	51	20361	101122279
GO:0016702	oxidoreductase activity, acting on single donors with incorporation of molecular oxygen, incorporation of two atoms of oxygen	molecular_function	0.84682	1	1	702	55	20361	101115197
GO:0048193	Golgi vesicle transport	biological_process	0.84722	1	4	702	160	20361	1.01111e+35
GO:0050662	coenzyme binding	molecular_function	0.84756	1	8	702	289	20361	1.0112e+71
GO:0000151	ubiquitin ligase complex	cellular_component	0.84884	1	3	702	118	20361	1.01117e+26
GO:0022904	respiratory electron transport chain	biological_process	0.84934	1	1	702	55	20361	101114883
GO:0006631	fatty acid metabolic process	biological_process	0.84983	1	2	702	83	20361	1.05612e+17
GO:0005654	nucleoplasm	cellular_component	0.84987	1	9	702	334	20361	1.01123e+77
GO:0044451	nucleoplasm part	cellular_component	0.84987	1	9	702	334	20361	1.01119e+77
GO:0004520	endodeoxyribonuclease activity	molecular_function	0.85065	1	1	702	43	20361	101106170
GO:0042175	nuclear outer membrane-endoplasmic reticulum membrane network	cellular_component	0.85074	1	5	702	209	20361	1.01111e+44
GO:0016042	lipid catabolic process	biological_process	0.85148	1	1	702	48	20361	101117580
GO:0005794	Golgi apparatus	cellular_component	0.85158	1	3	702	118	20361	1.01104e+26
GO:0016645	oxidoreductase activity, acting on the CH-NH group of donors	molecular_function	0.85241	1	1	702	45	20361	100137069
GO:0072686	mitotic spindle	cellular_component	0.85286	1	1	702	55	20361	101116309
GO:0015631	tubulin binding	molecular_function	0.85507	1	4	702	152	20361	1.01113e+35
GO:0006913	nucleocytoplasmic transport	biological_process	0.85772	1	4	702	179	20361	1.0111e+35
GO:0051169	nuclear transport	biological_process	0.85772	1	4	702	179	20361	1.01115e+35
GO:0006950	response to stress	biological_process	0.85823	1	34	702	1179	20361	101119199,101110470,101114878,101105473,105605519,101109980,101107646,105612572,106991784,101106170,101123125,101114169,101123503,101107891,101120976,101111914,101108973,101102729,101120630,101107758,101104486,101102538,101111386,101111299,100642179,101118500,101105057,101120651,101112580,101102610,101115254,101102681,101113274,101119906
GO:0006354	DNA-dependent transcription, elongation	biological_process	0.85889	1	1	702	51	20361	101123350
GO:0016462	pyrophosphatase activity	molecular_function	0.86321	1	30	702	934	20361	101104247,101106781,101106341,101119694,101109979,101120395,101113487,105605801,101104156,101119015,101112460,101108844,101122496,101116194,101119199,101105473,101118975,101102074,101115254,443010,101104309,101101998,100147794,101108762,101115490,101107321,101110526,101108960,101112580,101109626
GO:0006915	apoptotic process	biological_process	0.86502	1	4	702	177	20361	1.0112e+35
GO:0012501	programmed cell death	biological_process	0.86502	1	4	702	177	20361	1.0112e+35
GO:1901565	organonitrogen compound catabolic process	biological_process	0.86521	1	3	702	119	20361	1.01117e+23
GO:0044272	sulfur compound biosynthetic process	biological_process	0.86556	1	1	702	45	20361	101114822
GO:0016787	hydrolase activity	molecular_function	0.86734	1	119	702	3421	20361	101106001,101109979,101119694,101107196,101101909,101115641,101119015,101108803,101112460,101122496,101117891,101111593,101106954,101115695,101107739,443010,101101949,101123195,101112333,101103929,101102681,101119989,101110526,101104136,101103276,101120031,101112580,101108960,101109626,101109302,101113714,101104539,101103679,101113739,101122835,101107646,101113487,101122761,101115356,101105473,10…
GO:0019538	protein metabolic process	biological_process	0.8679	1	100	702	3359	20361	101110686,101104902,101106341,101107438,101119512,101111550,101104074,101121483,101102513,101110391,101105074,101108920,101108264,101119067,101104118,101117901,101116625,101111390,101104486,101107989,101115508,101102402,101113261,101104227,101114291,101109737,101107425,101102265,101105030,101119564,101107106,101120982,101122606,101111867,101102100,105606632,101102973,101110060,101116201,101104943…
GO:0050877	neurological system process	biological_process	0.86793	1	2	702	139	20361	1.01119e+17
GO:0032501	multicellular organismal process	biological_process	0.86809	1	25	702	907	20361	1.0112e+218
GO:0033176	proton-transporting V-type ATPase complex	cellular_component	0.86821	1	2	702	82	20361	1.01105e+17
GO:0032259	methylation	biological_process	0.86831	1	2	702	98	20361	100037702443274
GO:0010941	regulation of cell death	biological_process	0.86898	1	3	702	134	20361	1.0112e+26
GO:0042981	regulation of apoptotic process	biological_process	0.86898	1	3	702	134	20361	1.0112e+26
GO:0043067	regulation of programmed cell death	biological_process	0.86898	1	3	702	134	20361	1.0112e+26
GO:0015293	symporter activity	molecular_function	0.86917	1	1	702	49	20361	101108183
GO:0015294	solute:cation symporter activity	molecular_function	0.86917	1	1	702	49	20361	101108183
GO:0051028	mRNA transport	biological_process	0.87037	1	1	702	53	20361	101114034
GO:0016053	organic acid biosynthetic process	biological_process	0.87093	1	5	702	201	20361	1.01107e+44
GO:0046394	carboxylic acid biosynthetic process	biological_process	0.87093	1	5	702	201	20361	1.05612e+44
GO:0007218	neuropeptide signaling pathway	biological_process	0.87107	1	1	702	61	20361	101113806
GO:0009539	photosystem II reaction center	cellular_component	0.87177	1	1	702	49	20361	101122279
GO:0033554	cellular response to stress	biological_process	0.87229	1	15	702	581	20361	1.01115e+134
GO:0006508	proteolysis	biological_process	0.87246	1	21	702	769	20361	1.01116e+185
GO:0048523	negative regulation of cellular process	biological_process	0.87434	1	5	702	210	20361	1.01109e+44
GO:0003723	RNA binding	molecular_function	0.87439	1	21	702	782	20361	1.01115e+185
GO:0009611	response to wounding	biological_process	0.8758	1	4	702	193	20361	1.01113e+35
GO:0006643	membrane lipid metabolic process	biological_process	0.87621	1	2	702	99	20361	1.01115e+17
GO:0008219	cell death	biological_process	0.87622	1	5	702	210	20361	1.0112e+44
GO:0016265	death	biological_process	0.87622	1	5	702	210	20361	1.01123e+44
GO:0019725	cellular homeostasis	biological_process	0.8783	1	3	702	170	20361	1.01121e+26
GO:0008168	methyltransferase activity	molecular_function	0.87856	1	8	702	310	20361	1.01115e+68
GO:0015074	DNA integration	biological_process	0.87858	1	1	702	74	20361	101106329
GO:0000287	magnesium ion binding	molecular_function	0.87938	1	2	702	93	20361	1.01119e+17
GO:0048869	cellular developmental process	biological_process	0.87988	1	6	702	258	20361	1.01105e+53
GO:0017111	nucleoside-triphosphatase activity	molecular_function	0.88033	1	29	702	918	20361	101118975,101102074,101115254,100147794,101104309,101101998,101115490,101107321,101108762,101110526,101108960,101112580,101109626,101104247,101106781,101120395,101106341,101109979,101119694,101119015,105605801,101104156,101113487,101112460,101122496,101119199,101116194,101108844,101105473
GO:0044262	cellular carbohydrate metabolic process	biological_process	0.88119	1	1	702	59	20361	101116835
GO:0008017	microtubule binding	molecular_function	0.88238	1	3	702	125	20361	1.01116e+26
GO:0044431	Golgi apparatus part	cellular_component	0.88274	1	2	702	89	20361	1.01111e+17
GO:0008170	N-methyltransferase activity	molecular_function	0.88277	1	1	702	54	20361	101114918
GO:0044711	single-organism biosynthetic process	biological_process	0.88575	1	7	702	270	20361	1.05612e+62
GO:0018193	peptidyl-amino acid modification	biological_process	0.8865	1	1	702	74	20361	101107196
GO:0006400	tRNA modification	biological_process	0.8866	1	1	702	64	20361	101122281
GO:0007005	mitochondrion organization	biological_process	0.88708	1	2	702	98	20361	1.01111e+17
GO:0044454	nuclear chromosome part	cellular_component	0.88766	1	2	702	107	20361	1.01114e+17
GO:0016298	lipase activity	molecular_function	0.88829	1	1	702	47	20361	101117580
GO:0019752	carboxylic acid metabolic process	biological_process	0.8887	1	13	702	446	20361	1.01119e+116
GO:0016491	oxidoreductase activity	molecular_function	0.88968	1	43	702	1379	20361	101107837,443530,101104222,100137069,101104767,101104943,105611834,101113611,101115197,101117784,101121880,101108716,101113668,101117758,101106340,101122806,101107438,101113270,101111953,101116418,100169936,101113943,101108320,101106703,768095,101117580,443053,101120517,105613870,101118097,101114883,101110051,101118975,101110351,101110314,101118505,101101902,100568289,101102402,101112815,10110789…
GO:0005882	intermediate filament	cellular_component	0.89029	1	3	702	193	20361	1.01111e+26
GO:0045111	intermediate filament cytoskeleton	cellular_component	0.89029	1	3	702	193	20361	1.01111e+26
GO:0030170	pyridoxal phosphate binding	molecular_function	0.89169	1	1	702	54	20361	101119265
GO:0006605	protein targeting	biological_process	0.89186	1	6	702	255	20361	1.00125e+53
GO:0022900	electron transport chain	biological_process	0.89244	1	2	702	96	20361	1.01103e+17
GO:0070008	serine-type exopeptidase activity	molecular_function	0.89323	1	1	702	53	20361	101107196
GO:0051301	cell division	biological_process	0.89348	1	3	702	145	20361	1.01115e+26
GO:0016818	hydrolase activity, acting on acid anhydrides, in phosphorus-containing anhydrides	molecular_function	0.89508	1	31	702	989	20361	101109626,101112580,101108960,101110526,101108762,101121782,101107321,101115490,101104309,101101998,100147794,101115254,443010,101102074,101118975,101105473,101116194,101122496,101119199,101108844,101112460,105605801,101119015,101104156,101113487,101109979,101106341,101119694,101120395,101106781,101104247
GO:0042592	homeostatic process	biological_process	0.89519	1	4	702	205	20361	1.01121e+35
GO:0006887	exocytosis	biological_process	0.89566	1	1	702	57	20361	101107646
GO:0001775	cell activation	biological_process	0.89675	1	2	702	118	20361	1.01109e+17
GO:0090066	regulation of anatomical structure size	biological_process	0.89699	1	1	702	64	20361	101119564
GO:0045333	cellular respiration	biological_process	0.89826	1	2	702	103	20361	1.00136e+17
GO:0044707	single-multicellular organism process	biological_process	0.90256	1	20	702	776	20361	1.00642e+179
GO:0032940	secretion by cell	biological_process	0.90315	1	2	702	106	20361	1.01108e+17
GO:0046903	secretion	biological_process	0.90315	1	2	702	106	20361	1.01123e+17
GO:0006629	lipid metabolic process	biological_process	0.9032	1	14	702	499	20361	1.01114e+122
GO:0004842	ubiquitin-protein ligase activity	molecular_function	0.90416	1	5	702	182	20361	1.01117e+44
GO:0019787	small conjugating protein ligase activity	molecular_function	0.90416	1	5	702	182	20361	1.01117e+44
GO:0044710	single-organism metabolic process	biological_process	0.90455	1	78	702	2382	20361	101111779,101113427,101115197,101104767,105611834,101104943,101107837,101107789,101107321,101110667,101122806,101113668,101107295,443440,101102901,101103795,101104156,443053,101117580,100169936,101116418,101106703,101119512,101107438,101104150,443513,101102402,100568289,101101902,101112815,101104486,101117299,101110351,101119972,101120517,101118097,101113687,101105203,101114822,101113611,10112215…
GO:0044430	cytoskeletal part	cellular_component	0.90478	1	12	702	469	20361	1.01102e+107
GO:0006022	aminoglycan metabolic process	biological_process	0.90571	1	1	702	60	20361	101108067
GO:0004386	helicase activity	molecular_function	0.90646	1	5	702	213	20361	1.01105e+44
GO:1901607	alpha-amino acid biosynthetic process	biological_process	0.90686	1	2	702	109	20361	1.01105e+17
GO:0008104	protein localization	biological_process	0.90804	1	26	702	847	20361	101106631,101119632,101109149,101117032,105605902,101116170,100125358,101115490,101104002,101107739,101108178,101115229,101123504,101109559,101101892,101115356,101110972,101122835,101107646,101111779,101122281,101110686,101109277,101114241,101105341,101121946
GO:0051537	2 iron, 2 sulfur cluster binding	molecular_function	0.90817	1	1	702	57	20361	443513
GO:0045184	establishment of protein localization	biological_process	0.90924	1	23	702	762	20361	1.01108e+206
GO:0008173	RNA methyltransferase activity	molecular_function	0.9106	1	1	702	63	20361	101122281
GO:0070011	peptidase activity, acting on L-amino acid peptides	molecular_function	0.91061	1	28	702	977	20361	101115356,101110391,443068,101122761,101122922,101122835,101108920,101107196,101104539,101104860,101104943,101102100,101111550,101113714,443379,101118863,101120031,101105864,101102739,101104136,101109737,101122334,101103929,101102681,101102729,101101949,101109113,101115508
GO:0016701	oxidoreductase activity, acting on single donors with incorporation of molecular oxygen	molecular_function	0.911	1	1	702	68	20361	101115197
GO:0016667	oxidoreductase activity, acting on a sulfur group of donors	molecular_function	0.91122	1	3	702	153	20361	1.01107e+26
GO:0009893	positive regulation of metabolic process	biological_process	0.91176	1	4	702	177	20361	1.01113e+35
GO:0031325	positive regulation of cellular metabolic process	biological_process	0.91176	1	4	702	177	20361	1.01113e+35
GO:0000139	Golgi membrane	cellular_component	0.91307	1	1	702	54	20361	101103126
GO:0007600	sensory perception	biological_process	0.91397	1	1	702	114	20361	101119227
GO:0009247	glycolipid biosynthetic process	biological_process	0.91508	1	1	702	70	20361	101114682
GO:0046467	membrane lipid biosynthetic process	biological_process	0.91508	1	1	702	70	20361	101114682
GO:0015979	photosynthesis	biological_process	0.91511	1	4	702	178	20361	1.01104e+35
GO:0009615	response to virus	biological_process	0.91553	1	1	702	58	20361	101108973
GO:0016817	hydrolase activity, acting on acid anhydrides	molecular_function	0.91712	1	34	702	1097	20361	101113487,101104156,105605801,101105473,101119199,101108844,101106781,101104247,101120395,101106341,101121782,101115490,101118975,100147794,101101998,101104309,101112460,101119015,101116194,101122496,101116201,101119694,101109979,101110526,101107321,101108762,101109626,101108960,101112580,101115695,101102074,101103795,443010,101115254
GO:0031981	nuclear lumen	cellular_component	0.91752	1	12	702	470	20361	1.01112e+104
GO:0048519	negative regulation of biological process	biological_process	0.9183	1	6	702	253	20361	1.01122e+53
GO:0008233	peptidase activity	molecular_function	0.91873	1	30	702	1044	20361	101104539,101107196,101102100,101111550,101104860,101104943,101115356,443068,101110391,101115641,101122922,101122835,101108920,101122761,101101949,101103929,101102681,101102729,101109113,101115508,101120031,101118863,101105864,101102739,101104136,101113714,443379,101109737,101122334,101122806
GO:0003824	catalytic activity	molecular_function	0.91883	1	267	702	7631	20361	105616317,101119632,101107789,101113311,101102074,101105428,101111299,101113628,100642179,101107837,101104222,101122606,101114918,101104860,101102402,101120976,101114511,101113687,101118097,101112819,443068,101109931,101104156,101107495,101117580,101119369,101104247,101116950,101106781,101108716,101117758,101110526,101102681,101109663,101122496,101122150,101115777,101115641,101108411,101118500,10…
GO:0032787	monocarboxylic acid metabolic process	biological_process	0.91895	1	2	702	101	20361	1.01119e+17
GO:0034613	cellular protein localization	biological_process	0.91926	1	21	702	697	20361	1.01124e+188
GO:0070727	cellular macromolecule localization	biological_process	0.91926	1	21	702	697	20361	1.0111e+188
GO:0019079	viral genome replication	biological_process	0.91964	1	1	702	63	20361	101112580
GO:0016679	oxidoreductase activity, acting on diphenols and related substances as donors	molecular_function	0.92059	1	1	702	58	20361	101118505
GO:0044444	cytoplasmic part	cellular_component	0.92088	1	54	702	2124	20361	101109149,101106631,101108716,101113126,101114392,101114909,101106340,101110526,101122806,101104002,101102901,101108200,101115229,101111278,101110972,101115641,101121019,101103126,101107196,101106329,105606632,101105618,101110060,101121946,101112542,101105233,101107891,100125358,101112408,101117137,101108973,101117901,101104118,101118097,101108178,101120630,101118975,101110051,101114883,101109113…
GO:0008855	exodeoxyribonuclease VII activity	molecular_function	0.92122	1	2	702	110	20361	1.01113e+17
GO:0016151	nickel cation binding	molecular_function	0.92124	1	2	702	164	20361	1.01104e+17
GO:0009521	photosystem	cellular_component	0.92124	1	2	702	109	20361	1.01122e+17
GO:0006270	DNA replication initiation	biological_process	0.92322	1	1	702	85	20361	101120495
GO:0009653	anatomical structure morphogenesis	biological_process	0.92553	1	4	702	197	20361	1.01122e+35
GO:0015980	energy derivation by oxidation of organic compounds	biological_process	0.92576	1	2	702	112	20361	1.01115e+17
GO:0005815	microtubule organizing center	cellular_component	0.92617	1	1	702	65	20361	101107863
GO:0015988	energy coupled proton transmembrane transport, against electrochemical gradient	biological_process	0.9262	1	2	702	110	20361	1.01105e+17
GO:0015991	ATP hydrolysis coupled proton transport	biological_process	0.9262	1	2	702	110	20361	1.01105e+17
GO:0048037	cofactor binding	molecular_function	0.92638	1	9	702	363	20361	1.0112e+80
GO:0006403	RNA localization	biological_process	0.92685	1	1	702	66	20361	101114034
GO:0050657	nucleic acid transport	biological_process	0.92685	1	1	702	66	20361	101114034
GO:0050658	RNA transport	biological_process	0.92685	1	1	702	66	20361	101114034
GO:0051236	establishment of RNA localization	biological_process	0.92685	1	1	702	66	20361	101114034
GO:0004529	exodeoxyribonuclease activity	molecular_function	0.92727	1	2	702	113	20361	1.01113e+17
GO:0016895	exodeoxyribonuclease activity, producing 5'-phosphomonoesters	molecular_function	0.92727	1	2	702	113	20361	1.01112e+17
GO:0015629	actin cytoskeleton	cellular_component	0.92743	1	2	702	99	20361	1.01105e+17
GO:0007275	multicellular organismal development	biological_process	0.92757	1	8	702	350	20361	1.01115e+71
GO:0009579	thylakoid	cellular_component	0.92908	1	3	702	154	20361	1.01113e+26
GO:0044436	thylakoid part	cellular_component	0.92908	1	3	702	154	20361	1.01107e+26
GO:0008652	cellular amino acid biosynthetic process	biological_process	0.92959	1	3	702	153	20361	1.01105e+26
GO:0006091	generation of precursor metabolites and energy	biological_process	0.93154	1	5	702	222	20361	1.01115e+41
GO:0033036	macromolecule localization	biological_process	0.93295	1	30	702	1008	20361	101111779,101122835,101107646,101114682,101110972,101109559,101101892,101115356,101105341,101121946,101114241,101109277,101122281,101110686,101104002,101115490,100125358,105605902,101116170,101106631,101119632,101109149,101117032,101123504,101115229,101108178,101114034,101120609,101107739,101118032
GO:1901605	alpha-amino acid metabolic process	biological_process	0.93498	1	3	702	156	20361	1.00137e+26
GO:0015031	protein transport	biological_process	0.93619	1	22	702	758	20361	1.01109e+197
GO:0000228	nuclear chromosome	cellular_component	0.93664	1	2	702	121	20361	1.01116e+17
GO:0015931	nucleobase-containing compound transport	biological_process	0.93719	1	1	702	71	20361	101114034
GO:0032502	developmental process	biological_process	0.93839	1	14	702	579	20361	1.01117e+125
GO:0006869	lipid transport	biological_process	0.94096	1	1	702	94	20361	101114682
GO:0043233	organelle lumen	cellular_component	0.94307	1	12	702	497	20361	4.43068e+104
GO:0070013	intracellular organelle lumen	cellular_component	0.94307	1	12	702	497	20361	4.43068e+104
GO:0009896	positive regulation of catabolic process	biological_process	0.94443	1	1	702	72	20361	101111467
GO:0010508	positive regulation of autophagy	biological_process	0.94443	1	1	702	72	20361	101111467
GO:0031331	positive regulation of cellular catabolic process	biological_process	0.94443	1	1	702	72	20361	101111467
GO:0004536	deoxyribonuclease activity	molecular_function	0.94448	1	3	702	155	20361	1.01106e+26
GO:0051258	protein polymerization	biological_process	0.94619	1	2	702	141	20361	1.0112e+17
GO:0008135	translation factor activity, nucleic acid binding	molecular_function	0.94637	1	1	702	104	20361	101112759
GO:0005737	cytoplasm	cellular_component	0.94685	1	71	702	2679	20361	101121019,101115641,101110972,101104535,101112542,101105618,101106329,101118578,101107196,101103126,101119442,101110526,101106340,101114909,101114392,101109149,101108716,101113126,101121279,101122835,101107646,101115611,101104199,101122265,101111833,101102623,101113240,101103679,101113270,101115877,101108973,101106069,101112408,101107891,101105233,101111828,101109113,101123504,101110314,101114883…
GO:0031974	membrane-enclosed lumen	cellular_component	0.94706	1	12	702	504	20361	1.01115e+104
GO:0006397	mRNA processing	biological_process	0.94792	1	3	702	179	20361	1.01113e+23
GO:0016459	myosin complex	cellular_component	0.94976	1	1	702	57	20361	101108844
GO:0016579	protein deubiquitination	biological_process	0.9503	1	1	702	66	20361	101116625
GO:0070646	protein modification by small protein removal	biological_process	0.9503	1	1	702	66	20361	101116625
GO:0016763	transferase activity, transferring pentosyl groups	molecular_function	0.95466	1	1	702	84	20361	101105203
GO:0006928	cellular component movement	biological_process	0.95473	1	6	702	250	20361	1.0112e+53
GO:0043093	cytokinesis by binary fission	biological_process	0.95483	1	1	702	91	20361	101122281
GO:0043234	protein complex	cellular_component	0.95543	1	61	702	2052	20361	101113240,101122279,101122265,101111207,101110686,101120495,101106341,101107646,101104156,101106544,443068,101110805,101108844,105602103,101114878,101106703,101104867,101118975,101108584,101123504,101119170,101114511,101111130,101108973,101107863,101112408,101105233,101112662,101105356,101105618,101114241,101106329,101112542,101102395,101103126,101122655,101107166,101112636,101119694,101113427,10…
GO:0003008	system process	biological_process	0.95576	1	2	702	175	20361	1.01121e+17
GO:0065008	regulation of biological quality	biological_process	0.95627	1	15	702	631	20361	1.01121e+128
GO:0003968	RNA-directed RNA polymerase activity	molecular_function	0.95651	1	1	702	74	20361	101104285
GO:0006664	glycolipid metabolic process	biological_process	0.95711	1	1	702	85	20361	101114682
GO:0034357	photosynthetic membrane	cellular_component	0.95825	1	2	702	127	20361	1.01122e+17
GO:0006886	intracellular protein transport	biological_process	0.95859	1	16	702	596	20361	1.01109e+143
GO:0016796	exonuclease activity, active with either ribo- or deoxyribonucleic acids and producing 5'-phosphomonoesters	molecular_function	0.95887	1	2	702	128	20361	1.01113e+17
GO:0030529	ribonucleoprotein complex	cellular_component	0.9606	1	15	702	972	20361	1.0111e+131
GO:0032505	reproduction of a single-celled organism	biological_process	0.96131	1	1	702	94	20361	101122281
GO:0044446	intracellular organelle part	cellular_component	0.96276	1	54	702	1890	20361	101107863,101108973,101112408,101107891,100125358,101112662,101110276,101105233,101108584,101123504,101119170,101106620,101118975,101114883,101104867,101111130,101108178,101114511,101106703,105602103,101114878,101110805,443068,101108844,101111207,101113240,101106341,101120495,101110686,101110526,101122806,101114909,101123350,101114392,101108960,101109663,101105428,101108379,101102901,101117261,10…
GO:0042157	lipoprotein metabolic process	biological_process	0.96336	1	1	702	109	20361	101114682
GO:0008565	protein transporter activity	molecular_function	0.96369	1	1	702	85	20361	100125358
GO:0000917	barrier septum assembly	biological_process	0.96524	1	1	702	97	20361	101122281
GO:0032506	cytokinetic process	biological_process	0.96524	1	1	702	97	20361	101122281
GO:0090529	cell septum assembly	biological_process	0.96524	1	1	702	97	20361	101122281
GO:0043566	structure-specific DNA binding	molecular_function	0.96659	1	1	702	100	20361	101119199
GO:0044422	organelle part	cellular_component	0.96733	1	54	702	1902	20361	101104867,101114883,101118975,101106620,101119170,101123504,101108584,101114511,101111130,101108178,101107863,101112408,101108973,101105233,101110276,101112662,100125358,101107891,101113240,101111207,101110686,101120495,101106341,443068,101108844,101110805,105602103,101114878,101106703,101108379,101105428,101109663,101115263,101101949,101116309,101108200,101117261,101102901,101114909,101122806,10…
GO:0051536	iron-sulfur cluster binding	molecular_function	0.96737	1	2	702	141	20361	443513101105341
GO:0051540	metal cluster binding	molecular_function	0.96737	1	2	702	141	20361	443513101105341
GO:0044428	nuclear part	cellular_component	0.96812	1	17	702	677	20361	1.01112e+149
GO:0016482	cytoplasmic transport	biological_process	0.96825	1	6	702	316	20361	1.01115e+53
GO:0005198	structural molecule activity	molecular_function	0.96857	1	29	702	1453	20361	101108379,101112322,101104867,101123504,101109113,105613042,101117901,101111130,105604107,101111717,101110526,101109149,101122279,101115253,105606632,101110060,101106538,101114569,101120756,101104244,101110686,101104902,101107438,101121019,101104199,101104181,101112759,101112048,101106703
GO:0005577	fibrinogen complex	cellular_component	0.96989	1	1	702	104	20361	101108973
GO:0030168	platelet activation	biological_process	0.96989	1	1	702	104	20361	101108973
GO:0071702	organic substance transport	biological_process	0.97055	1	30	702	1093	20361	101114034,101120904,101107739,101123504,101113357,101122005,101115229,105605902,100125358,101117032,101106631,101119632,101109149,101103292,101104002,101115490,101112165,101112636,101110686,101122281,101121946,101105341,101109277,101114682,101110972,101101892,101109559,101111779,101107646,101122835
GO:0006813	potassium ion transport	biological_process	0.97059	1	2	702	132	20361	1.01112e+17
GO:0044767	single-organism developmental process	biological_process	0.97124	1	5	702	273	20361	1.01104e+44
GO:0008238	exopeptidase activity	molecular_function	0.97227	1	2	702	130	20361	1.01103e+17
GO:0000902	cell morphogenesis	biological_process	0.97272	1	1	702	98	20361	101119564
GO:0032989	cellular component morphogenesis	biological_process	0.97272	1	1	702	98	20361	101119564
GO:0019954	asexual reproduction	biological_process	0.97508	1	1	702	104	20361	101122281
GO:0003777	microtubule motor activity	molecular_function	0.97593	1	1	702	69	20361	101108960
GO:0048856	anatomical structure development	biological_process	0.97777	1	5	702	297	20361	1.01104e+44
GO:0051641	cellular localization	biological_process	0.97961	1	26	702	958	20361	101101892,101115356,101109559,101110805,101107646,101122835,101122281,101119564,101110686,101103126,101114241,101109277,101121946,101105341,101117032,101109149,101106631,105605902,100125358,101116170,101115490,101104002,101107739,101108178,101115229,101123504
GO:0007018	microtubule-based movement	biological_process	0.98144	1	1	702	75	20361	101108960
GO:0000910	cytokinesis	biological_process	0.98376	1	1	702	113	20361	101122281
GO:0004527	exonuclease activity	molecular_function	0.98459	1	2	702	154	20361	1.01112e+17
GO:0016071	mRNA metabolic process	biological_process	0.98469	1	3	702	214	20361	4.43068e+23
GO:0051649	establishment of localization in cell	biological_process	0.98516	1	22	702	862	20361	1.01115e+197
GO:0046907	intracellular transport	biological_process	0.98602	1	19	702	763	20361	1.01104e+170
GO:0004540	ribonuclease activity	molecular_function	0.98697	1	1	702	122	20361	101107739
GO:0004519	endonuclease activity	molecular_function	0.98715	1	2	702	173	20361	1.01104e+17
GO:0004518	nuclease activity	molecular_function	0.9879	1	7	702	370	20361	1.01117e+62
GO:0030674	protein binding, bridging	molecular_function	0.98818	1	1	702	124	20361	101108973
GO:0060090	binding, bridging	molecular_function	0.98818	1	1	702	124	20361	101108973
GO:0007596	blood coagulation	biological_process	0.98936	1	1	702	130	20361	101108973
GO:0003735	structural constituent of ribosome	molecular_function	0.98997	1	9	702	831	20361	1.0111e+80
GO:0012505	endomembrane system	cellular_component	0.99062	1	6	702	343	20361	1.01123e+53
[truncated: 16 more rows]

## Sheet: MF vs ML mRNA
gene list: DE mRNAs identified in MF vs. ML
GO_accession	Description	Term_type	Over_represented_pValue	Corrected_pValue	CAD_item	CAD_list	Bg_item	Bg_list	Gene_names
GO:0071840	cellular component organization or biogenesis	biological_process	4.6084e-05	0.20609	55	340	1727	20361	101109612,443274,101112734,101123485,101102548,101109362,101107444,101115715,101120768,101110947,101106906,101107392,101105636,780511,101105324,101114649,443469,101102648,101113427,101103846,101111396,106990090,101119971,101115490,101110920,101110342,101108973,101103398,101102663,101108178,101104585,101102193,101106908,101109229,101109966,101120756,101120777,101114242,101119938,101117024,10111609…
GO:0016043	cellular component organization	biological_process	0.00040262	0.90026	49	340	1596	20361	101102737,101116916,101116403,101119420,101110012,101114406,101111925,101118671,101106365,106990980,101117876,101111160,101116878,101108178,101102663,101103398,101108973,101106908,101102193,101109966,101120756,101104585,101120777,101119938,101116090,101117024,101114242,101105324,101102648,101114649,443469,101111396,101119971,101103846,101113427,101110920,101115490,101123485,101112734,101102548,10…
GO:0008092	cytoskeletal protein binding	molecular_function	0.0012833	1	22	340	502	20361	1.01107e+197
GO:0015631	tubulin binding	molecular_function	0.0013994	1	10	340	152	20361	1.01123e+89
GO:0008017	microtubule binding	molecular_function	0.0014628	1	9	340	125	20361	1.01103e+80
GO:0022613	ribonucleoprotein complex biogenesis	biological_process	0.0015854	1	8	340	131	20361	1.0699e+65
GO:0007017	microtubule-based process	biological_process	0.0022299	1	13	340	231	20361	1.01117e+116
GO:0042611	MHC protein complex	cellular_component	0.0030134	1	3	340	31	20361	1.0112e+26
GO:0042613	MHC class II protein complex	cellular_component	0.0030134	1	3	340	31	20361	1.0111e+26
GO:0007010	cytoskeleton organization	biological_process	0.0031082	1	18	340	426	20361	1.01109e+161
GO:0006996	organelle organization	biological_process	0.0031685	1	30	340	915	20361	101116403,101116916,101102737,101114649,106990980,101106365,101114406,101103846,101111396,101116878,101115490,101110920,101111160,101108973,101109612,101108178,101112734,101103398,101120756,101107444,101106908,101102193,101120777,101110947,101120768,101114242,101119938,101117024,101107392,101105636
GO:0005245	voltage-gated calcium channel activity	molecular_function	0.0033156	1	2	340	4	20361	1.01118e+17
GO:0070588	calcium ion transmembrane transport	biological_process	0.0038636	1	3	340	12	20361	1.01109e+26
GO:0008150	biological_process	biological_process	0.0043683	1	277	340	15203	20361	101113925,101112706,101107392,101113888,101110522,101122574,101103746,101116580,101117989,101119060,101122835,101106761,101102648,101114649,101115891,101119015,101116876,101111678,101114242,101116177,101123227,101119176,101109746,101116084,101111609,101102489,101104362,101117696,101117187,101119989,101101844,101116558,101118988,101102737,101116916,101110012,101111009,101119334,443213,101119820,10…
GO:1901700	response to oxygen-containing compound	biological_process	0.005346	1	4	340	31	20361	1.01107e+35
GO:0030865	cortical cytoskeleton organization	biological_process	0.0058419	1	3	340	12	20361	1.01121e+26
GO:0030866	cortical actin cytoskeleton organization	biological_process	0.0058419	1	3	340	12	20361	1.01121e+26
GO:0009987	cellular process	biological_process	0.0059535	1	229	340	12236	20361	101120777,101112580,101108762,101104446,101119938,101110510,101103398,101102663,101120538,101104585,105607811,100135687,101114639,101120756,101109966,101112185,101111925,101106365,101118671,101105449,101111160,101105752,101101931,101119420,101118119,101121464,101106808,101112983,101122791,101105303,101110252,101113884,101108864,101103276,101102720,101109612,100170317,101102548,101107321,443270,10…
GO:0003724	RNA helicase activity	molecular_function	0.0066861	1	6	340	79	20361	1.01113e+53
GO:0016597	amino acid binding	molecular_function	0.0072291	1	3	340	17	20361	1.01113e+26
GO:0006816	calcium ion transport	biological_process	0.0072573	1	4	340	32	20361	1.01119e+35
GO:0005179	hormone activity	molecular_function	0.007595	1	10	340	245	20361	1.0111e+86
GO:0043015	gamma-tubulin binding	molecular_function	0.0077411	1	2	340	6	20361	1.01116e+17
GO:0016044	cellular membrane organization	biological_process	0.0078413	1	7	340	112	20361	1.01119e+62
GO:0009186	deoxyribonucleoside diphosphate metabolic process	biological_process	0.008375	1	2	340	5	20361	1.01107e+17
GO:0044459	plasma membrane part	cellular_component	0.0084835	1	10	340	214	20361	1.01118e+89
GO:0009415	response to water stimulus	biological_process	0.0089298	1	2	340	6	20361	1.01103e+17
GO:0061024	membrane organization	biological_process	0.010188	1	8	340	150	20361	1.0111e+71
GO:0051704	multi-organism process	biological_process	0.010267	1	36	340	1257	20361	101122835,101120029,443189,101110804,101115490,101109680,101112825,101111764,101115623,101104420,101112070,101107444,101102548,101110822,101106906,101108864,101115715,101115635,101119334,101105703,101115029,101111919,101108691,101116558,101115785,101117187,101114406,101111372,101120756,101112408,101121274,101108973,101123125,105609426,101111880,101112580
GO:0009877	nodulation	biological_process	0.01099	1	3	340	23	20361	1.01111e+26
GO:0007617	mating behavior	biological_process	0.011395	1	3	340	21	20361	4.43189e+23
GO:0019098	reproductive behavior	biological_process	0.011395	1	3	340	21	20361	1.01107e+23
GO:0008851	ethanolamine ammonia-lyase activity	molecular_function	0.011812	1	1	340	1	20361	101114794
GO:0009141	nucleoside triphosphate metabolic process	biological_process	0.012149	1	7	340	142	20361	1.01112e+59
GO:0044419	interspecies interaction between organisms	biological_process	0.01221	1	20	340	615	20361	1.01115e+179
GO:0031406	carboxylic acid binding	molecular_function	0.012313	1	3	340	21	20361	1.01113e+26
GO:0010035	response to inorganic substance	biological_process	0.012427	1	4	340	37	20361	1.01107e+35
GO:0005685	U1 snRNP	cellular_component	0.013045	1	2	340	6	20361	1.01105e+17
GO:0006376	mRNA splice site selection	biological_process	0.013045	1	2	340	6	20361	1.01105e+17
GO:0030532	small nuclear ribonucleoprotein complex	cellular_component	0.013045	1	2	340	6	20361	1.01105e+17
GO:0008770	[acyl-carrier-protein] phosphodiesterase activity	molecular_function	0.013125	1	1	340	2	20361	101111009
GO:0042254	ribosome biogenesis	biological_process	0.013259	1	6	340	122	20361	1.01118e+47
GO:0070070	proton-transporting V-type ATPase complex assembly	biological_process	0.01413	1	2	340	13	20361	1.01109e+17
GO:0070072	vacuolar proton-transporting V-type ATPase complex assembly	biological_process	0.01413	1	2	340	13	20361	1.01109e+17
GO:0003777	microtubule motor activity	molecular_function	0.014349	1	6	340	69	20361	1.01123e+53
GO:0007618	mating	biological_process	0.01545	1	3	340	23	20361	1.01107e+23
GO:0044703	multi-organism reproductive process	biological_process	0.01545	1	3	340	23	20361	4.43189e+23
GO:0070071	proton-transporting two-sector ATPase complex assembly	biological_process	0.015519	1	2	340	14	20361	1.01103e+17
GO:0007029	endoplasmic reticulum organization	biological_process	0.017225	1	3	340	26	20361	1.01121e+26
GO:0051705	multi-organism behavior	biological_process	0.017902	1	3	340	26	20361	1.01113e+23
GO:0019882	antigen processing and presentation	biological_process	0.018659	1	3	340	52	20361	1.01116e+26
GO:0007018	microtubule-based movement	biological_process	0.019376	1	6	340	75	20361	1.0112e+53
GO:0016841	ammonia-lyase activity	molecular_function	0.019695	1	1	340	2	20361	101114794
GO:0043666	regulation of phosphoprotein phosphatase activity	biological_process	0.021153	1	1	340	3	20361	105607811
GO:0044403	symbiosis, encompassing mutualism through parasitism	biological_process	0.021317	1	19	340	611	20361	1.01117e+170
GO:0006096	glycolysis	biological_process	0.021321	1	3	340	30	20361	1.01116e+26
GO:0005549	odorant binding	molecular_function	0.021448	1	2	340	10	20361	1.01114e+17
GO:0042375	quinone cofactor metabolic process	biological_process	0.022391	1	2	340	12	20361	1.01107e+17
GO:0045426	quinone cofactor biosynthetic process	biological_process	0.022391	1	2	340	12	20361	1.01116e+17
GO:0019637	organophosphate metabolic process	biological_process	0.023023	1	17	340	504	20361	1.01112e+149
GO:0000245	spliceosomal complex assembly	biological_process	0.023089	1	2	340	9	20361	1.01105e+17
GO:0006553	lysine metabolic process	biological_process	0.023995	1	2	340	16	20361	443270101119255
GO:0005520	insulin-like growth factor binding	molecular_function	0.024176	1	2	340	21	20361	443469101117876
GO:0051128	regulation of cellular component organization	biological_process	0.024375	1	7	340	173	20361	1.0111e+59
GO:0006261	DNA-dependent DNA replication	biological_process	0.024413	1	5	340	108	20361	1.01121e+44
GO:0022618	ribonucleoprotein complex assembly	biological_process	0.024727	1	2	340	10	20361	1.01105e+17
GO:0001558	regulation of cell growth	biological_process	0.025017	1	2	340	22	20361	443469101117876
GO:0005515	protein binding	molecular_function	0.026079	1	142	340	6046	20361	101111550,101106908,101108973,101118419,101117024,101101939,101111880,101123125,101106406,101105530,101122986,101113630,101105703,101123150,101120998,101114779,101103709,101116403,101116878,101106433,101122496,101117876,101115785,106990980,101104978,101115950,101112585,101116684,101104867,101110947,101117203,101121429,101110865,101114240,101103342,101102485,101104420,101113427,101109229,101108178…
GO:0019838	growth factor binding	molecular_function	0.026419	1	2	340	23	20361	101117876443469
GO:0048306	calcium-dependent protein binding	molecular_function	0.026468	1	1	340	1	20361	101111609
GO:0071826	ribonucleoprotein complex subunit organization	biological_process	0.026738	1	2	340	11	20361	1.01105e+17
GO:0006007	glucose catabolic process	biological_process	0.026771	1	3	340	35	20361	1.01118e+26
GO:0019320	hexose catabolic process	biological_process	0.026771	1	3	340	35	20361	1.01118e+26
GO:0005488	binding	molecular_function	0.027112	1	242	340	11924	20361	101112542,101122574,101106001,101102163,101115715,101113925,101107392,101105636,101119271,101117404,101114170,101122835,443189,101106761,101113409,101102297,101103349,101118423,101115891,101114291,101114649,101116191,101119971,101110145,101103746,105601931,101105281,101116580,101113583,101115097,101117230,101119060,101105652,101122625,101116177,101104029,101109746,101116084,101105807,101102193,10…
GO:0042181	ketone biosynthetic process	biological_process	0.030009	1	2	340	14	20361	1.01107e+17
GO:1901661	quinone metabolic process	biological_process	0.030009	1	2	340	14	20361	1.01116e+17
GO:1901663	quinone biosynthetic process	biological_process	0.030009	1	2	340	14	20361	1.01107e+17
GO:0005891	voltage-gated calcium channel complex	cellular_component	0.030394	1	2	340	12	20361	1.01105e+17
GO:0034704	calcium channel complex	cellular_component	0.030394	1	2	340	12	20361	1.01118e+17
GO:1901698	response to nitrogen compound	biological_process	0.03075	1	2	340	13	20361	1.01116e+17
GO:0010564	regulation of cell cycle process	biological_process	0.03131	1	4	340	70	20361	1.01122e+35
GO:0009144	purine nucleoside triphosphate metabolic process	biological_process	0.031642	1	6	340	132	20361	1.01119e+50
GO:0009199	ribonucleoside triphosphate metabolic process	biological_process	0.031642	1	6	340	132	20361	1.01124e+50
GO:0009205	purine ribonucleoside triphosphate metabolic process	biological_process	0.031642	1	6	340	132	20361	1.01117e+50
GO:0048309	endoplasmic reticulum inheritance	biological_process	0.034275	1	2	340	13	20361	1.01114e+17
GO:0043167	ion binding	molecular_function	0.034291	1	127	340	5471	20361	101107127,101114406,101108987,101120241,101105752,101115714,101112750,101116619,101118119,101105303,101117987,101122791,101108762,101112580,101119938,101110510,105609426,101108178,101109873,101116440,101111491,101112185,101109966,101114639,101120756,101102513,101120867,101105882,101116155,101115623,101115490,101110920,101103679,101109436,100302079,101102360,101109680,101113784,101113858,101123336…
GO:0016049	cell growth	biological_process	0.034538	1	2	340	24	20361	443469101117876
GO:0006909	phagocytosis	biological_process	0.03481	1	1	340	2	20361	101111925
GO:0030100	regulation of endocytosis	biological_process	0.03481	1	1	340	2	20361	101111925
GO:0045806	negative regulation of endocytosis	biological_process	0.03481	1	1	340	2	20361	101111925
GO:0050764	regulation of phagocytosis	biological_process	0.03481	1	1	340	2	20361	101111925
GO:0050765	negative regulation of phagocytosis	biological_process	0.03481	1	1	340	2	20361	101111925
GO:0005576	extracellular region	cellular_component	0.036013	1	39	340	1623	20361	101112706,101110252,101115635,101101882,101116679,101106906,101102720,101119368,101112825,101113427,101112070,101115490,101116580,101108197,101102323,101119832,443189,101110804,101109289,443469,101122104,101116876,101105652,101121274,101116084,101108973,101117522,101120756,101106433,101107127,101115785,101117876,101122496,101116878,101118808,101111919,101106676,101106824,101113034
GO:0006554	lysine catabolic process	biological_process	0.037334	1	1	340	1	20361	443270
GO:0009068	aspartate family amino acid catabolic process	biological_process	0.037334	1	1	340	1	20361	443270
GO:0019475	L-lysine catabolic process to acetate	biological_process	0.037334	1	1	340	1	20361	443270
GO:0019477	L-lysine catabolic process	biological_process	0.037334	1	1	340	1	20361	443270
GO:0046440	L-lysine metabolic process	biological_process	0.037334	1	1	340	1	20361	443270
GO:0046365	monosaccharide catabolic process	biological_process	0.037769	1	3	340	40	20361	1.01116e+26
GO:0003880	protein C-terminal carboxyl O-methyltransferase activity	molecular_function	0.038098	1	1	340	4	20361	101110348
GO:0004671	protein C-terminal S-isoprenylcysteine carboxyl O-methyltransferase activity	molecular_function	0.038098	1	1	340	4	20361	101110348
GO:0006481	C-terminal protein methylation	biological_process	0.038098	1	1	340	4	20361	101110348
GO:0018410	C-terminal protein amino acid modification	biological_process	0.038098	1	1	340	4	20361	101110348
GO:0043687	post-translational protein modification	biological_process	0.038098	1	1	340	4	20361	101110348
GO:0051861	glycolipid binding	molecular_function	0.038282	1	2	340	14	20361	1.01117e+17
GO:0006270	DNA replication initiation	biological_process	0.038958	1	4	340	85	20361	1.01121e+35
GO:0005743	mitochondrial inner membrane	cellular_component	0.040098	1	6	340	157	20361	1.01119e+53
GO:0009132	nucleoside diphosphate metabolic process	biological_process	0.040801	1	2	340	15	20361	1.01107e+17
GO:0017172	cysteine dioxygenase activity	molecular_function	0.041747	1	1	340	4	20361	101102489
GO:0046439	L-cysteine metabolic process	biological_process	0.041747	1	1	340	4	20361	101102489
GO:0040008	regulation of growth	biological_process	0.042246	1	2	340	26	20361	443469101117876
GO:0045259	proton-transporting ATP synthase complex	cellular_component	0.042455	1	4	340	78	20361	1.01119e+35
GO:0051205	protein insertion into membrane	biological_process	0.042706	1	2	340	20	20361	1.01108e+17
GO:0051668	localization within membrane	biological_process	0.042706	1	2	340	20	20361	1.01121e+17
GO:0006793	phosphorus metabolic process	biological_process	0.045196	1	38	340	1299	20361	101107611,101107321,780507,443274,101110522,105613207,101110171,101106906,101117432,101103276,101114291,101114649,101115891,101113784,101117404,101118975,101109789,101119255,101111396,101102513,101102485,101110145,101112482,101112185,101112408,105607811,101104362,101104446,101102458,101105303,101116916,101116403,101119420,101123531,101120241,101115714,101104977,101119989
GO:0043169	cation binding	molecular_function	0.045678	1	81	340	3456	20361	101112898,101106001,101122574,101104533,101115635,101110947,105613207,101109284,101106761,101114240,101116112,101114170,101102323,101118423,101115891,101116191,101110107,101103349,101103746,101104420,101110145,101115508,101116580,101105281,101113583,101104029,101102489,101115925,101102193,101122986,101122642,101114400,101116090,101103709,101105696,101109324,101110012,101119334,101113630,101117187…
GO:0034220	ion transmembrane transport	biological_process	0.045802	1	11	340	336	20361	1.01124e+98
GO:0008849	enterochelin esterase activity	molecular_function	0.046104	1	1	340	2	20361	101103679
GO:0006113	fermentation	biological_process	0.046725	1	1	340	2	20361	443270
GO:0019665	anaerobic amino acid catabolic process	biological_process	0.046725	1	1	340	2	20361	443270
GO:0016812	hydrolase activity, acting on carbon-nitrogen (but not peptide) bonds, in cyclic amides	molecular_function	0.046815	1	1	340	2	20361	101107196
GO:0005542	folic acid binding	molecular_function	0.048905	1	1	340	3	20361	101102297
GO:0072341	modified amino acid binding	molecular_function	0.048905	1	1	340	3	20361	101102297
GO:0044699	single-organism process	biological_process	0.049466	1	152	340	8130	20361	101119334,101110012,443213,101102737,101118808,101116916,101111919,101119989,101101844,101118988,101107570,101117187,101102193,101112408,101117696,101122625,101119176,101120121,101116084,101104029,101116876,101114242,101119015,101109980,101114291,101114649,443189,101122835,101106761,101115097,101116580,101119060,101119971,101103746,101107444,101107392,101105636,101113925,101112706,101122791,10111…
GO:0006534	cysteine metabolic process	biological_process	0.050287	1	1	340	5	20361	101102489
GO:0044770	cell cycle phase transition	biological_process	0.050689	1	3	340	56	20361	1.01109e+26
GO:1901987	regulation of cell cycle phase transition	biological_process	0.050689	1	3	340	56	20361	1.01122e+26
GO:0016835	carbon-oxygen lyase activity	molecular_function	0.052282	1	5	340	103	20361	1.01104e+44
GO:0006139	nucleobase-containing compound metabolic process	biological_process	0.052403	1	89	340	4120	20361	101109324,101108691,101105696,101103709,101118988,101115827,101116558,101107196,101117187,101122496,101122772,443262,101112408,101111609,101115896,101106908,101110342,101105652,101122625,101114794,101116090,101122986,101114649,101109980,101118423,101103349,101110107,101103342,443189,101102323,101105324,101117989,101119971,101115494,101104533,101109331,101112898,101114403,101105636,101102560,10561…
GO:0019033	viral tegument	cellular_component	0.053345	1	2	340	18	20361	1.05609e+17
GO:0006754	ATP biosynthetic process	biological_process	0.053412	1	4	340	90	20361	1.01119e+35
GO:0048308	organelle inheritance	biological_process	0.053791	1	2	340	16	20361	1.01117e+17
GO:0003729	mRNA binding	molecular_function	0.054325	1	2	340	18	20361	1.01105e+17
GO:0046872	metal ion binding	molecular_function	0.054433	1	80	340	3438	20361	101105696,101103709,101109324,101110012,101113630,101119334,101117187,101107570,101106433,101109307,101119989,101104029,101102489,101102193,101115925,101122986,101122642,101114400,101116090,101106761,101116112,101114170,101102323,101114240,101116191,101115891,101118423,101103349,101110107,101103746,101104420,101110145,101115508,101113583,101116580,101105281,101112898,101104533,101122574,101106001…
GO:0044085	cellular component biogenesis	biological_process	0.054598	1	23	340	917	20361	7.80511e+200
GO:0007586	digestion	biological_process	0.054603	1	1	340	6	20361	101116679
GO:0005216	ion channel activity	molecular_function	0.054703	1	16	340	469	20361	1.01123e+140
GO:0022838	substrate-specific channel activity	molecular_function	0.054703	1	16	340	469	20361	1.01114e+140
GO:0014070	response to organic cyclic compound	biological_process	0.055128	1	4	340	63	20361	1.01105e+35
GO:0005753	mitochondrial proton-transporting ATP synthase complex	cellular_component	0.055267	1	3	340	58	20361	1.01119e+26
GO:0007610	behavior	biological_process	0.055345	1	3	340	44	20361	1.01107e+23
GO:0044724	single-organism carbohydrate catabolic process	biological_process	0.055557	1	3	340	51	20361	1.01116e+26
GO:0019866	organelle inner membrane	cellular_component	0.055801	1	6	340	164	20361	1.01119e+53
GO:0033057	multicellular organismal reproductive behavior	biological_process	0.05619	1	2	340	17	20361	101112825443189
GO:0044706	multi-multicellular organism process	biological_process	0.05619	1	2	340	17	20361	443189101112825
GO:0045297	post-mating behavior	biological_process	0.05619	1	2	340	17	20361	101112825443189
GO:0045924	regulation of female receptivity	biological_process	0.05619	1	2	340	17	20361	443189101112825
GO:0046008	regulation of female receptivity, post-mating	biological_process	0.05619	1	2	340	17	20361	101112825443189
GO:0060180	female mating behavior	biological_process	0.05619	1	2	340	17	20361	443189101112825
GO:0006796	phosphate-containing compound metabolic process	biological_process	0.057007	1	37	340	1287	20361	101120241,101104977,101115714,101119989,101105303,101116403,101116916,101119420,101123531,101102458,101104446,105607811,101112408,101104362,101112185,101119255,101110145,101112482,101111396,101102485,101102513,101114291,101115891,101118975,101109789,101113784,101117404,101110171,101106906,105613207,101117432,101103276,101107321,101107611,101110522,443274,780507
GO:0015267	channel activity	molecular_function	0.0573	1	16	340	472	20361	1.01114e+140
GO:0022803	passive transmembrane transporter activity	molecular_function	0.0573	1	16	340	472	20361	1.01123e+140
GO:0006928	cellular component movement	biological_process	0.057459	1	10	340	250	20361	1.01117e+89
GO:0005201	extracellular matrix structural constituent	molecular_function	0.058378	1	3	340	32	20361	1.01119e+26
GO:0006812	cation transport	biological_process	0.058798	1	22	340	773	20361	1.01121e+197
GO:0005262	calcium channel activity	molecular_function	0.059061	1	3	340	51	20361	1.01109e+26
GO:0043547	positive regulation of GTPase activity	biological_process	0.059469	1	1	340	2	20361	443274
GO:0046483	heterocycle metabolic process	biological_process	0.060094	1	92	340	4278	20361	101123531,101119420,101106824,101113034,101105449,101103795,101115714,100135687,101104585,101120538,101112185,101109229,101114639,101112580,101120777,101108762,105609426,101119938,101102874,101118975,101108755,100169935,101113784,101123336,101109289,101121816,101115623,101112482,106990090,101102360,101109680,101119255,101115490,101109436,443274,101119344,101119368,101107321,101107611,101110252,10…
GO:0007009	plasma membrane organization	biological_process	0.060305	1	2	340	13	20361	1.0111e+17
GO:0051726	regulation of cell cycle	biological_process	0.060666	1	5	340	126	20361	1.01122e+44
GO:0005261	cation channel activity	molecular_function	0.060805	1	9	340	236	20361	1.01119e+80
GO:0004601	peroxidase activity	molecular_function	0.060951	1	2	340	24	20361	1.01114e+17
GO:0016684	oxidoreductase activity, acting on peroxide as acceptor	molecular_function	0.060951	1	2	340	24	20361	1.01114e+17
[truncated: 1,579 more rows]

## Sheet: wF vs wL lncRNA cis
gene list: cis-target genes of DE lncRNAs identified in wF vs. wL
GO_accession	Description	Term_type	Over_represented_pValue	Corrected_pValue	CAD_item	CAD_list	Bg_item	Bg_list	Gene_names
GO:0042221	response to chemical stimulus	biological_process	5.0816e-05	0.22725	5	45	261	20361	1.00579e+41
GO:0043190	ATP-binding cassette (ABC) transporter complex	cellular_component	0.0043201	1	1	45	3	20361	101119115
[truncated: 396 more rows]

## Sheet: wF vs wL lncRNA trans
gene list: trans-target genes of DE lncRNAs identified in wF vs. wL
[truncated: 1,253 more rows]

[truncated: 7 more sheets: wF vs wL mRNA, MF vs wF lncRNA cis, MF vs wF lncRNA trans, MF vs wF mRNA, ML vs wL lncRNA cis, ML vs wL lncRNA trans, ML vs wL mRNA]
